# Supplementary material for: Affinity-guided labeling reveals P2X7 nanoscale membrane redistribution during BV2 microglial activation
Source: eLife journal article supplement (doi:10.7554/elife.106096), 2025-04-30
Supplement: fig2-data1 [file Figure 2-source data 1.pdf › Figure 2-source data 1.pdf]

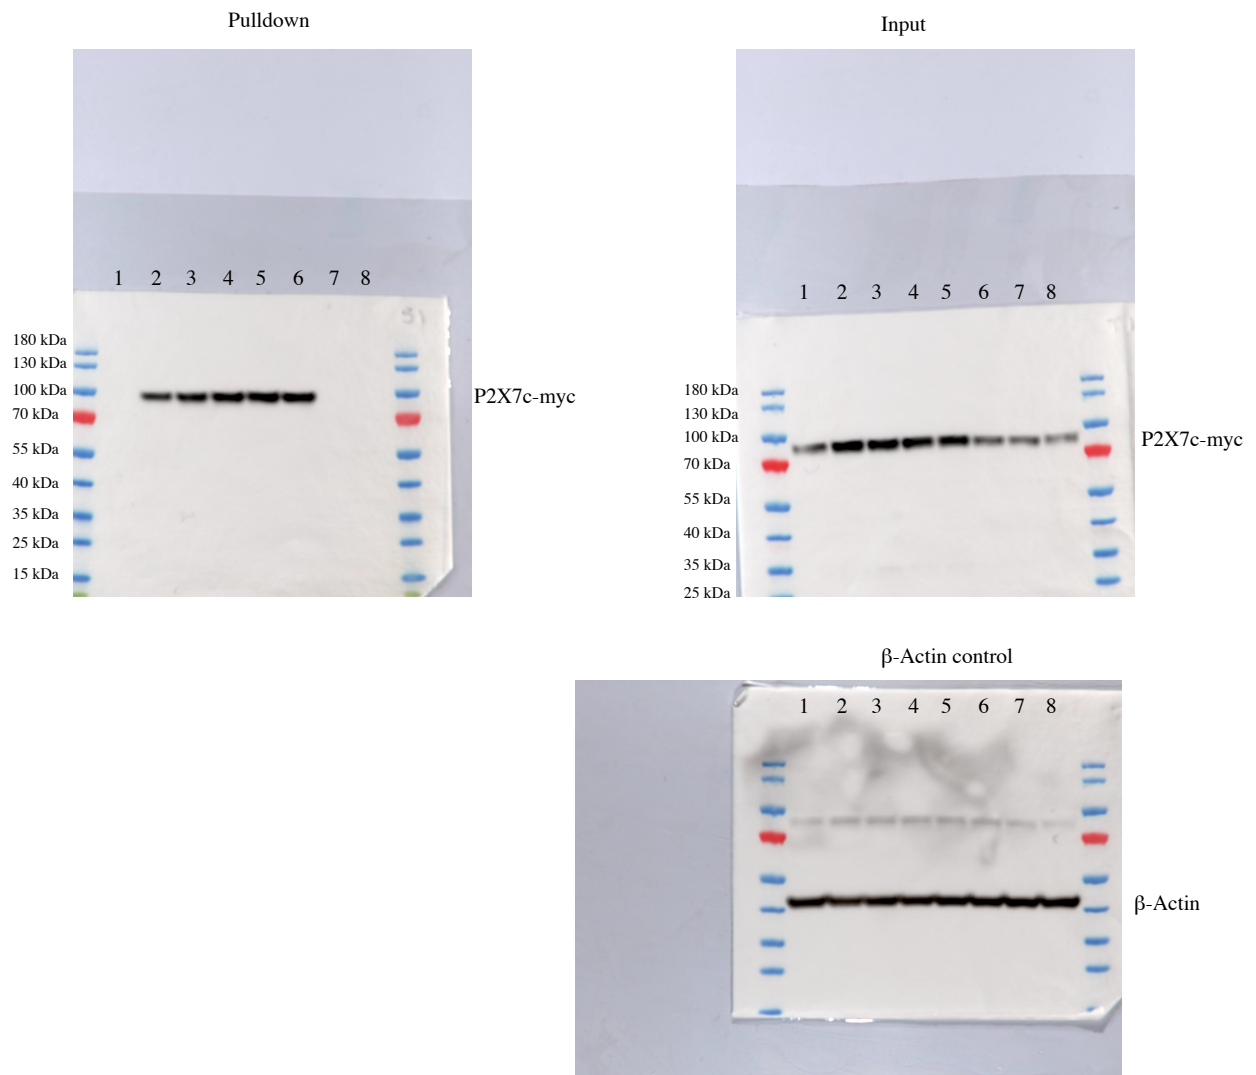

**Figure 2 – source data 1.** Original membranes corresponding to Figure 2C. The indicated lanes are shown in figure. Molecular weight markers are in color.
