# Supplementary material for: Affinity-guided labeling reveals P2X7 nanoscale membrane redistribution during BV2 microglial activation
Source: eLife journal article supplement (doi:10.7554/elife.106096), 2025-04-30
Supplement: fig5-figsupp1-data1 [file Figure 5-figure supplement 1-source data 1.pdf › Figure 5-figure supplement 1-source data 1.pdf]

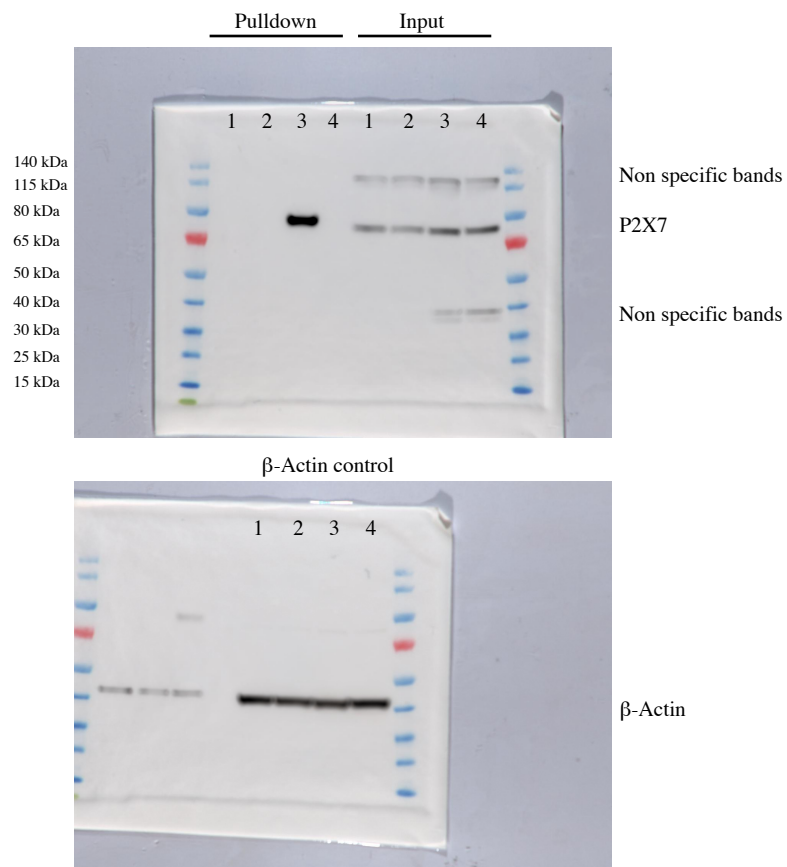

**Figure 5–figure supplement 1 – source data 1.** Original membranes corresponding to Figure 5–figure supplement 1A and 1B. The indicated lanes are shown in figure. Molecular weight markers are in color.
