# Supplementary material for: Affinity-guided labeling reveals P2X7 nanoscale membrane redistribution during BV2 microglial activation
Source: eLife. 2026 Jan 9;14:RP106096. doi: 10.7554/eLife.106096 (PMC12788799; doi:10.7554/eLife.106096)
Supplement: Figure 2—figure supplement 1—source data 3. [file elife-106096-fig2-figsupp1-data3.xlsx]

## Sheet: Figure 2-figure supplement 1C
Panel C: Labeling kinetics
0.5 µM X7-uP				2.5 µM X7-uP
time (min)	mean	s.e.m.		time (min)	mean	s.e.m.
0	0	0		0	0	0
5	0.0559961	0.0157288		10	0.805445	0.131645
10	0.301464	0.0575316		20	1.0434	0.0566367
20	0.559383	0.216388		30	1	0
30	1	0		60	0.891437	0.0366788
60	0.970689	0.0693475

## Sheet: Figure 2-figure supplement 1D
Panel D: Concentration dependence
[X7-uP] (µM)	kapp (s-1)	s.d.
0	0	0
0.5	0.000818	0.000149
1	0.001408	0.000195
1.5	0.001848	0.000808
2.5	0.002957	0.000606
