# Supplementary material for: Affinity-guided labeling reveals P2X7 nanoscale membrane redistribution during BV2 microglial activation
Source: eLife. 2026 Jan 9;14:RP106096. doi: 10.7554/eLife.106096 (PMC12788799; doi:10.7554/eLife.106096)
Supplement: Figure 2—figure supplement 2—source data 3. [file elife-106096-fig2-figsupp2-data3.xlsx]

## Sheet: Figure 2-figure supplement 2B
Panel B: Labeling yield (%)
HEK293T	BV2
67.2852	80.3755
67.8306	81.2175
59.9369	80.0011
	78.0707
