# Supplementary material for: Affinity-guided labeling reveals P2X7 nanoscale membrane redistribution during BV2 microglial activation
Source: eLife. 2026 Jan 9;14:RP106096. doi: 10.7554/eLife.106096 (PMC12788799; doi:10.7554/eLife.106096)
Supplement: Figure 2—source data 3. [file elife-106096-fig2-data3.xlsx]

## Sheet: Figure 2B
Pane B: Current inhibition (%)
1 µM X7-uP	1 µM AZ10606120	Control	300 nM X7-uP	10 nM AZ10606120
72.9907	99.7	-27.2688	54.8007	32.8887
67.6051	99.9	-16.0701	46.0533	53.4754
92.708	99.6094	-7.75302	38.3472	45.9736
83.8583	99.5763	-9.77671	21.6233	15.1764
			55.0684	31.7099
			41.924	13.4974
				56.3336
				45.6594

## Sheet: Figure 2D
Panel D: Labeling kinetics
time (min)	mean	s.e.m.
0	0	0
5	0.24	0.116995
10	0.49	0.0916513
20	0.85	0.080004
30	1	0
60	0.94	0.0360101
