# Supplementary material for: Affinity-guided labeling reveals P2X7 nanoscale membrane redistribution during BV2 microglial activation
Source: eLife. 2026 Jan 9;14:RP106096. doi: 10.7554/eLife.106096 (PMC12788799; doi:10.7554/eLife.106096)
Supplement: Figure 3—figure supplement 1—source data 3. [file elife-106096-fig3-figsupp1-data3.xlsx]

## Sheet: Figure 3-figure supplement 1C
Panel C: Surface expression
Untransfected	rP2X1-GFP	rP2X2-GFP	rP2X3-GFP	rP2X4-GFP	rP2X5-GFP	rP2X6-GFP
0	0.537	2.9798	0.55	1.0647	1.9971	0.1215
0	0.4909	2.0628	0.6619	1.4258	2.3553	0.062
0	0.02544	0.43771	0.45958	0.46869	2.30498	0.04986
0	0.46917	2.53898	0.35686	0.80509	2.2148	0.02801
0	0.38783	0.4997	0.36733	1.52253	2.36981	0.04941

## Sheet: Figure 3-figure supplement 1D
Panel D: Total expression
Untransfected	rP2X1-GFP	rP2X2-GFP	rP2X3-GFP	rP2X4-GFP	rP2X5-GFP	rP2X6-GFP
0	0.6244	1.6936	0.9788	1.7558	1.4319	0.3789
0	0.54761	1.16555	0.48747	1.29438	1.61048	0.01679
0	0.01468	0.12902	0.12608	0.56035	1.3094	0.02464
0	0.24084	1.37048	0.26159	1.08301	1.57631	0.14636
0	0.3424	0.44815	0.37837	1.75279	1.58478	0.18092
