# Supplementary material for: Affinity-guided labeling reveals P2X7 nanoscale membrane redistribution during BV2 microglial activation
Source: eLife. 2026 Jan 9;14:RP106096. doi: 10.7554/eLife.106096 (PMC12788799; doi:10.7554/eLife.106096)
Supplement: Figure 3—source data 1. [file elife-106096-fig3-data1.xlsx]

## Sheet: Figure 3C
Panel C: Alexa 647 fluorescence (a.u.)		Note: Please use the provided RStudio code for Figure 3C to generate the histogram.
P2X7-mScarlet					(+)AZ10606120					(+)A740003					P2X1-GFP					P2X2-GFP					P2X3-GFP					P2X4-GFP					P2X5-GFP					P2X6-GFP
Serie	Cellule	Area	Mean	Background	Serie	Cellule	Area	Mean	Background	Serie	Cellule	Area	Mean	Background	Serie	Cellule	Area	Mean	Background	Serie	Cellule	Area	Mean	Background	Serie	Cellule	Area	Mean	Background	Serie	Cellule	Area	Mean	Background	Serie	Cellule	Area	Mean	Background	Serie	Cellule	Area	Mean	Background
1		94.842	178.952	10.049	1		153.865	30.916	23.350	1		74.385	37.835	22.428	1		63.284	37.954	27.283	1		61.799	42.601	29.739	1		79.467	39.372	29.585	1		74.307	40.558	31.609	1		121.279	16.882	7.328	1		82.190	11.203	7.929
1		116.471	157.287	9.543	1		113.774	29.322	23.090	1		55.011	36.454	24.425	1		90.034	36.889	27.697	1		47.141	38.051	28.565	1		77.434	41.389	30.525	1		101.187	39.276	30.810	1		63.701	15.778	6.420	1		59.545	16.339	7.307
1		49.291	502.337	11.136	1		91.220	28.980	21.678	1		109.617	35.555	32.663	1		86.503	37.551	28.299	1		62.998	38.317	26.316	1		96.861	37.169	28.655	1		81.799	45.896	29.773	1		45.238	13.452	6.595	1		36.717	12.609	7.813
1		159.924	95.885	13.171	1		83.389	31.782	19.418	1		54.463	41.231	27.647	1		62.307	35.704	27.724	1		82.881	42.321	21.560	1		139.741	39.302	31.154	1		98.751	46.339	28.859	1		85.786	14.903	7.352	1		56.457	11.610	7.612
1		149.748	249.547	9.774	1		103.402	34.032	22.756	1		73.786	39.587	28.118	2		43.062	29.992	9.885	1		68.131	38.096	23.587	1		69.330	39.372	28.433	1		37.382	52.442	27.598	1		71.506	17.116	8.073	1		103.363	11.656	7.972
1		56.248	262.875	11.412	1		92.119	31.984	23.821	2		26.020	41.116	25.506	2		55.636	22.874	11.572	2		34.007	40.888	33.400	1		78.464	44.056	29.447	1		44.756	46.760	32.316	1		71.871	18.236	8.246	2		85.539	18.327	11.794
2		102.646	239.759	9.618	2		105.005	54.284	36.028	2		28.013	40.829	18.312	2		81.812	21.060	10.421	2		134.477	38.440	36.911	1		49.017	37.717	30.548	1		58.007	44.319	36.727	2		85.565	22.751	15.817	2		93.435	17.953	11.416
2		103.884	352.592	6.712	2		73.643	49.485	43.849	2		44.795	49.542	18.183	2		77.799	24.123	10.848	2		101.917	39.733	32.155	1		53.799	53.684	36.824	1		60.626	35.548	38.077	2		111.519	22.615	16.798	2		115.454	17.815	11.246
2		36.066	294.971	7.445	2		63.792	58.589	37.624	2		97.005	42.730	18.914	2		63.506	22.184	11.303	2		63.845	44.688	33.921	2		51.857	38.620	34.766	1		52.287	34.158	38.237	2		92.053	22.025	16.193	2		135.168	18.053	11.112
2		105.904	391.441	15.399	2		94.060	56.570	35.931	2		60.105	38.030	17.476	2		63.662	23.508	11.462	2		138.491	37.761	36.249	2		64.366	43.656	39.298	2		37.408	48.104	53.564	2		52.965	24.474	16.551	2		135.363	18.227	11.245
3		99.024	205.484	13.664	2		48.639	60.916	46.311	2		102.803	42.153	22.311	2		54.711	24.348	12.281	2		163.924	39.810	36.149	2		66.919	41.083	37.324	2		45.082	49.728	45.302	2		100.340	23.101	17.735	2		136.953	14.905	14.870
3		83.832	315.179	9.226	3		84.991	33.931	20.500	3		77.278	49.921	30.480	2		35.062	21.353	12.753	2		99.168	43.153	28.868	2		50.541	50.673	38.115	2		115.207	40.206	38.420	2		52.379	25.980	19.199	2		198.778	14.551	13.914
3		109.018	439.773	11.687	3		169.188	34.262	18.078	3		71.154	41.972	21.848	2		69.056	19.932	11.558	2		39.075	35.904	31.155	2		72.887	44.245	37.960	2		21.212	50.541	44.264	3		200.615	25.804	16.960	3		171.468	14.930	8.982
4		120.510	468.647	16.011	3		176.980	32.011	24.931	3		90.008	45.299	39.922	3		43.323	41.167	39.584	2		104.379	37.649	34.243	2		97.461	47.351	48.785	2		44.743	45.495	55.268	3		165.761	24.914	20.151	3		80.757	20.479	12.408
4		44.470	178.491	17.429	3		69.981	29.668	26.018	3		101.187	45.828	33.867	3		67.532	46.663	34.056	3		50.776	36.399	21.073	2		77.486	46.258	44.344	2		53.864	45.802	52.505	3		121.422	26.099	22.025	3		125.318	16.842	8.806
4		74.164	178.454	16.792	4		67.662	36.008	22.788	4		60.822	34.534	26.620	3		94.229	49.488	35.370	3		38.242	39.076	18.839	3		36.587	42.837	32.903	3		44.926	41.735	22.782	4		75.584	18.151	13.142	3		74.320	19.655	13.490
4		58.698	193.860	13.667	4		71.871	35.782	26.309	4		46.763	39.323	24.030	3		86.073	52.521	31.512	3		66.229	32.638	19.429	3		67.271	39.387	32.794	3		63.740	38.171	25.449	4		72.105	19.435	12.100	3		26.932	17.746	13.630
5		50.229	222.616	13.285	4		57.369	37.581	26.731	4		91.024	38.242	22.181	3		77.825	48.777	31.415	3		64.678	41.398	20.400	3		52.431	44.116	34.568	3		83.649	48.290	25.224	4		75.271	19.919	12.105	4		97.995	27.336	23.506
5		54.685	168.364	13.949	4		57.955	37.471	26.480	5		55.636	38.252	36.997	4		83.975	25.079	20.119	3		69.591	43.820	20.598	3		96.887	44.967	35.974	3		54.424	39.953	25.785	4		72.822	19.055	12.962	4		170.087	27.570	24.475
5		40.730	171.821	13.582	4		49.095	33.116	27.984	5		51.141	43.767	34.849	4		156.354	27.075	22.897	3		69.591	43.820	19.879	4		102.464	32.716	31.838	3		77.825	35.564	27.085	5		192.354	24.551	17.394	4		160.927	35.554	19.095
5		134.582	246.718	10.493	4		70.985	29.814	25.619	5		66.763	40.859	33.594	4		67.675	41.342	30.559	3		45.799	44.702	21.215	4		88.301	42.181	29.420	3		149.448	38.759	30.101	5		98.360	24.469	20.636	4		182.126	33.888	35.210
6		207.299	133.064	11.694	4		75.454	27.327	20.802	5		85.903	41.836	31.066	5		56.717	40.583	30.913	3		60.353	39.254	20.668	4		135.520	42.881	29.780	3		116.497	37.409	29.759	5		36.105	25.883	25.419	4		132.810	30.585	21.730
7		143.064	363.686	15.960	4		55.154	30.283	18.279	5		108.901	44.021	28.855	5		52.248	36.971	25.442	3		71.897	43.601	29.571	4		169.214	39.447	27.927	3		98.816	38.516	28.007	5		92.679	27.739	24.049	4		220.433	25.539	20.377
7		72.926	190.992	15.064	4		54.229	35.085	18.327	5		76.483	55.486	30.831	5		99.676	30.994	23.308	3		140.406	28.560	20.271	4		100.940	52.247	32.176	3		99.793	35.421	27.188	5		91.024	28.157	24.463	4		179.377	28.457	22.202
7		87.428	492.746	13.813	4		59.740	34.814	16.461	6		106.477	36.453	26.349	5		127.689	33.354	28.126	3		97.773	38.831	29.448	5		69.043	23.367	11.478	3		29.538	36.232	27.437	6		102.698	30.026	22.520	4		216.316	48.209	24.515
7		80.548	172.884	17.689	4		51.545	39.919	21.834	6		83.623	31.855	21.580	6		93.408	29.774	13.444	3		59.415	37.185	31.200	5		51.701	34.871	13.021	3		91.441	38.228	32.632	6		70.750	32.651	26.204	5		91.089	14.201	10.938
7		133.044	153.656	17.123	4		35.766	29.940	26.569	6		33.733	41.421	23.315	6		80.809	27.825	12.726	3		91.467	33.240	31.039	5		49.864	30.947	12.326	4		47.636	45.819	31.977	7		70.529	18.111	13.287	5		87.454	15.886	10.781
7		147.481	203.822	15.813	4		41.369	35.201	26.689	6		28.639	39.079	18.283	6		72.874	35.754	15.320	3		73.995	32.952	34.580	5		41.642	26.436	12.335	4		55.271	51.358	33.889	7		103.337	20.987	11.596	5		151.090	14.616	10.297
8		34.111	484.548	9.638	4		41.590	39.811	24.938	6		67.675	39.669	19.484	6		81.330	29.300	18.651	4		37.603	54.629	42.339	5		49.929	30.527	12.115	4		119.103	32.174	31.009	7		57.551	17.507	16.146	5		67.962	15.871	9.972
8		21.850	413.557	8.523	5		83.545	42.912	26.613	7		46.502	37.361	36.084	7		66.020	37.908	27.779	4		36.157	50.646	39.659	5		56.926	26.423	11.439	4		48.365	42.270	30.677	7		71.884	19.759	16.164	5		83.089	18.186	9.820
8		34.150	341.806	6.798	5		130.634	33.566	21.848	7		23.974	46.602	34.788	7		57.108	37.362	27.045	4		79.011	49.711	45.357	5		40.847	25.867	12.085	4		56.444	33.614	29.031	8		348.200	46.368	19.333	5		82.138	17.090	9.165
8		19.818	286.714	8.347	5		79.584	41.719	21.069	7		71.766	43.131	22.585	7		144.067	44.834	27.943	4		87.285	59.926	40.210	5		52.548	30.109	11.594	4		75.063	47.974	29.059	8		160.810	27.123	18.676	5		51.310	19.172	9.721
8		23.466	377.992	7.295	5		93.187	35.360	26.470	8		64.848	48.347	23.009	7		164.380	47.240	38.716	4		33.551	59.938	27.516	5		99.611	27.304	13.326	4		61.734	48.515	27.799	8		78.281	31.885	22.503	6		104.275	19.638	16.856
8		71.832	338.715	7.809	5		84.470	38.820	35.602	8		60.183	49.309	19.813	7		125.513	61.694	48.506	4		30.346	51.743	48.912	5		93.669	26.065	12.795	4		66.581	40.527	32.331	8		250.935	29.580	17.691	6		124.653	18.004	13.127
8		71.193	411.641	8.209	5		59.193	36.029	32.521	8		83.350	40.053	24.184	7		92.027	39.220	50.262	4		48.040	52.867	60.634	5		89.148	26.109	12.508	4		65.968	45.320	30.583	8		204.263	23.613	18.678	6		172.719	18.465	14.603
9		115.324	159.524	19.160	5		76.353	35.164	34.062	8		58.320	40.540	28.404	7		112.158	35.616	34.417	4		84.822	64.183	44.033	5		26.802	26.135	13.045	4		53.616	40.635	38.735	9		58.711	22.184	16.277	6		104.731	19.589	13.430
9		62.281	130.885	19.775	6		88.783	37.208	31.657	8		136.823	28.723	33.837	8		78.412	30.023	19.698	4		71.727	64.702	41.439	5		39.388	35.071	13.122	4		13.968	36.787	31.024	9		46.268	21.442	16.601	6		74.112	22.950	19.595
					6		111.663	38.103	25.317						8		34.085	39.728	22.069	4		77.369	63.983	43.301	5		130.490	24.564	12.173	4		45.408	42.900	33.329	9		69.630	24.660	19.321	7		94.373	16.297	14.009
					6		79.154	40.253	30.277	9		48.769	39.065	23.973	8		44.639	35.378	18.910	4		55.623	69.842	45.670	6		123.689	50.124	49.022	4		64.405	41.630	34.021	9		68.678	25.417	22.074	7		124.836	13.433	12.257
10		125.031	461.358	21.057	6		183.012	46.706	39.866	9		63.675	37.865	27.698	8		46.659	28.234	17.814	4		48.483	56.823	74.338	6		271.626	47.887	39.677	4		50.294	41.621	24.000	10		96.770	23.844	14.559	7		98.373	15.857	10.327
10		90.347	670.853	16.300	6		117.930	49.858	34.358	9		94.308	36.718	33.510	8		35.544	28.392	18.988	4		23.010	61.576	59.543	6		209.566	53.521	45.431	4		71.415	50.221	37.887	10		82.594	25.491	19.562	7		44.535	13.802	13.912
10		52.900	633.801	21.166	7		90.047	23.109	15.804	9		85.682	37.086	35.721	9		70.959	30.447	19.791	5		84.770	59.137	44.179	6		67.024	78.889	45.172	4		59.271	37.687	39.236	11		65.121	39.229	25.823	7		51.701	16.880	12.910
10		56.066	488.847	19.317	7		82.464	19.738	15.743	9		22.697	46.682	36.297	9		74.633	34.667	19.054	5		97.695	68.740	43.926	6		96.014	77.176	39.757	5		42.763	41.856	16.878	11		80.249	37.561	26.864	7		116.627	18.627	13.305
10		114.151	194.473	19.575	7		56.900	22.342	15.528	10		140.171	68.847	67.823	9		59.154	28.321	18.671	5		103.311	49.420	57.378	6		37.733	79.933	59.804	5		79.258	34.753	17.091	11		86.203	37.564	30.768	7		69.708	21.155	14.581
10		148.654	166.718	19.066	7		67.519	19.324	11.424	11		61.877	37.131	24.444	9		108.418	28.462	16.487	5		93.904	53.146	57.967	6		67.050	51.968	62.771	5		45.460	32.085	17.417	11		97.265	34.444	28.066	8		98.047	13.040	9.501
11		105.526	186.986	8.815	7		139.025	26.472	13.008	11		62.946	39.757	29.163	9		78.333	30.394	14.957	6		87.063	49.427	40.605	6		166.699	60.236	60.406	5		111.806	33.732	18.976	11		158.751	39.598	33.393	8		119.702	12.076	9.794
11		54.945	456.932	8.497	7		120.327	23.080	17.246	11		155.155	41.180	19.448	9		75.219	27.359	20.204	6		79.011	46.384	45.928	7		104.666	21.992	13.567	5		54.711	38.392	16.150	12		80.848	33.449	16.942	8		88.288	13.908	9.113
11		42.242	513.635	6.613	7		82.021	23.029	17.529	11		97.304	43.505	22.325						6		49.812	48.196	56.891	7		103.767	24.494	13.083	5		44.053	33.510	16.800	12		158.478	24.162	18.905	8		63.167	15.670	9.584
11		99.050	730.612	6.983	7		91.259	25.098	20.118	11		59.232	32.676	19.701	10		121.031	32.463	22.349	6		74.711	59.871	41.302	7		56.835	19.470	14.781	5		92.014	27.122	16.484	12		90.672	25.849	20.470	9		103.259	19.586	9.187
11		40.040	590.141	7.488	7		67.506	24.609	19.550	12		84.184	34.017	15.800	10		98.672	39.852	23.125	7		33.043	45.009	36.474	7		58.190	17.768	15.057	5		72.131	33.750	15.717	12		116.249	32.542	22.021	9		91.689	19.716	9.575
11		40.535	445.484	10.081	8		74.907	37.777	29.724	12		52.991	36.508	14.536	10		73.239	37.242	21.052	7		19.453	48.009	32.707	7		58.411	24.021	13.677	5		103.168	39.954	17.292	13		207.247	22.534	18.715	9		35.531	19.402	9.981
11		73.460	457.716	8.426	8		90.490	35.858	30.591	12		68.457	39.911	16.788	10		87.441	37.376	24.599	7		58.945	52.811	35.496	7		67.376	24.255	18.851	5		132.054	45.949	19.756	13		210.622	27.138	22.058	9		100.470	19.622	10.817
12		24.613	129.068	11.929	8		104.848	42.170	35.679	12		45.642	33.330	17.668	10		58.776	37.870	28.736	8		71.962	41.685	38.482	7		45.278	15.757	13.378	5		73.135	35.823	22.493	13		143.859	26.648	23.390	9		82.985	18.280	8.814
12		53.525	130.522	12.567	8		51.831	44.212	46.384	12		47.727	31.232	14.535	10		167.494	35.070	30.367	9		89.421	40.915	35.424	8		107.259	20.116	17.748	5		77.030	38.372	19.079						9		116.158	15.798	8.499
12		84.262	164.008	11.182	8		70.125	48.922	38.403	12		34.606	36.118	16.660	10		148.302	31.364	28.967	9		113.669	62.948	44.612	8		159.260	25.072	16.689	6		59.180	34.207	27.058						9		152.302	18.816	9.472
12		56.874	337.061	11.481	8		72.118	48.092	43.537	12		31.127	30.728	20.685	11		92.184	25.044	7.883	9		71.766	56.113	57.964	8		66.972	33.170	18.499	6		57.213	40.345	27.284	14		75.206	15.546	11.389	10		177.657	15.451	8.822
12		49.981	223.868	15.656	8		65.695	49.891	37.917	13		57.812	31.304	14.175	11		43.558	26.037	8.676	9		131.389	56.969	44.324	8		64.470	28.108	15.189	6		74.190	28.627	23.130	14		87.219	17.255	11.821	10		41.942	19.671	9.068
13		40.144	348.409	7.005	9		75.649	28.619	23.642	13		72.952	33.966	13.667	11		82.985	27.680	8.011	9		113.917	66.721	42.972	8		40.939	28.760	19.493	6		87.545	30.783	21.426	14		104.887	18.892	19.506	10		107.663	16.822	9.060
13		46.281	338.025	7.564	9		121.826	33.204	21.581	13		51.857	33.193	15.090	11		55.870	24.885	8.343	9		38.580	58.956	53.655	8		65.134	33.784	23.556	6		101.865	37.852	27.084	14		71.128	19.215	15.287	10		113.826	15.529	9.144
13		59.310	446.256	8.102	9		89.317	30.574	21.455	14		39.245	31.326	23.962	11		85.565	21.577	8.113	9		37.629	58.941	75.593	9		147.012	17.388	12.986	6		108.510	36.858	26.745	15		32.443	19.193	9.050	10		112.145	18.261	10.448
13		44.040	382.299	7.256	9		103.337	27.547	19.499	14		45.642	31.471	23.221	11		78.529	24.909	8.132	9		45.942	79.095	41.223	9		76.327	17.839	12.522	6		90.334	41.425	30.924	15		52.835	13.622	10.477	10		114.816	16.903	7.900
14		89.004	399.457	12.155	9		104.848	25.816	22.660	14		63.402	38.375	18.593	11		60.613	23.756	8.336	10		70.073	49.838	42.635	9		51.310	22.562	12.716	7		51.949	29.998	30.027	15		47.597	18.876	10.619	10		59.662	17.154	11.404
14		40.118	529.760	7.704	9		116.015	30.953	24.038	14		47.545	37.866	23.417	11		68.718	26.600	7.864	10		70.867	39.038	49.418	9		80.770	20.823	12.190	7		57.004	31.302	26.306	15		64.822	17.537	11.639	11		80.197	20.570	13.034
14		46.815	815.297	7.183	9		153.813	26.362	25.290	14		16.430	35.877	23.994	11		91.767	25.861	8.676	10		79.402	50.569	45.765	9		53.108	20.358	15.567	7		100.366	33.119	28.111	15		20.417	15.763	11.596	11		134.751	19.784	15.086
14		34.984	594.158	7.917	9		109.865	35.066	23.425	15		121.604	40.893	25.375	11		109.031	23.935	8.870	10		85.109	52.821	50.238	9		82.307	22.402	13.036	7		116.510	37.185	29.027	16		170.765	17.475	9.234	11		83.454	21.227	18.072
14		28.978	353.677	6.873	10		114.451	27.779	16.021	15		72.718	41.530	22.659	12		99.298	44.128	37.664	10		70.007	50.294	58.073	9		40.365	24.879	13.093	7		57.499	41.735	30.681	16		92.001	14.385	9.033	11		109.096	23.281	16.868
14		35.375	330.689	6.856	10		94.803	30.994	15.239	15		70.450	42.713	27.609	12		65.108	39.749	34.261	10		75.337	57.651	36.567	9		82.333	24.739	16.554	7		102.685	38.006	31.424	17		77.890	19.274	8.699	12		73.981	22.064	17.454
14		41.942	311.006	7.569	10		120.666	27.840	18.788	15		71.232	34.031	28.833	13		69.135	30.929	18.508	10		60.535	62.955	38.982	9		142.738	28.610	14.181	7		63.362	29.463	31.386	17		70.203	15.815	10.561	13		79.089	19.163	8.319
15		30.437	392.069	6.662	10		77.434	26.951	19.347	16		30.789	37.986	24.651	13		63.180	28.587	18.085	10		41.577	71.102	34.290	9		283.157	18.825	13.321	7		90.790	39.503	33.668	18		77.838	19.437	10.951	13		91.754	14.550	8.637
15		44.704	792.029	6.962						16		89.500	33.234	21.652	13		82.842	29.519	17.586	11		101.200	48.374	34.199	9		231.313	21.430	15.608	7		100.979	40.392	40.446	18		84.978	19.594	10.350	13		71.662	17.067	8.378
15		53.760	621.155	7.233	11		107.037	24.946	15.616	16		79.714	35.940	20.787	13		57.838	30.116	15.791	11		97.031	44.100	34.097	10		108.314	26.630	18.097	8		104.171	44.969	36.284	18		48.652	17.890	8.826	13		117.969	16.199	9.194
15		45.369	584.690	7.730	11		113.878	27.615	10.846	16		64.744	32.086	27.130	13		42.997	29.459	17.178	11		57.004	62.869	39.051	10		128.341	23.036	15.433	8		57.447	44.745	36.688	18		120.614	15.777	9.959	13		62.998	17.306	8.822
15		61.200	626.967	8.825	11		91.376	24.540	15.306	16		52.431	33.862	24.437	13		63.389	29.362	15.422	11		63.258	48.514	40.595	10		95.767	25.380	19.730	8		78.255	39.418	41.036	18		116.523	16.741	11.774	13		150.439	13.095	8.690
15		50.476	705.558	9.315	11		65.994	41.980	17.356	16		83.636	29.208	23.484	13		47.740	33.400	18.550	12		94.334	33.035	30.369	10		143.442	26.155	22.886	8		73.721	51.226	39.702	18		96.457	14.227	11.043	13		119.402	13.198	9.031
15		63.089	235.772	10.832	11		104.835	28.237	17.453	17		42.372	22.260	14.593	14		61.356	35.209	26.125	12		101.904	29.072	32.441	10		155.820	24.496	26.934	8		120.914	36.765	36.652	18		60.248	13.839	14.240	13		108.510	15.209	9.640
15		47.440	233.221	8.675	11		115.845	33.248	17.283	17		31.375	23.009	16.536	14		76.275	33.847	24.063	12		138.360	36.573	26.917	10		80.913	27.603	24.367	8		103.689	40.562	32.706	18		44.887	16.942	13.511	13		38.789	17.027	9.977
16		117.070	370.395	10.040	11		99.350	32.633	18.277	17		64.405	25.878	13.509	14		107.598	35.150	24.005	12		76.392	35.411	26.046	10		109.565	23.733	21.173	8		156.745	42.925	31.803	18		26.632	17.176	12.354	13		46.698	13.966	10.122
16		76.757	280.903	10.092	11		69.604	32.700	17.096	17		45.225	27.589	18.557	14		90.724	42.412	21.274	12		132.718	41.414	32.937	10		117.943	28.567	17.883	8		146.321	37.176	38.172	19		75.571	14.519	8.150	14		92.027	22.409	16.751
16		82.333	442.682	9.413	12		76.653	26.459	20.943	18		45.017	20.895	8.529	14		78.985	39.930	21.706	12		67.636	39.728	31.127	10		126.933	27.311	25.882	8		162.895	41.223	45.121	19		87.154	17.122	7.820	14		88.679	27.899	19.087
17		59.011	413.780	6.238	12		87.923	26.444	21.072	18		26.333	21.050	9.744	14		39.545	41.688	21.595	12		78.216	38.185	23.658						8		54.033	48.026	47.249	19		49.030	14.799	7.440	14		90.620	33.884	17.572
17		84.913	496.251	6.947	12		93.864	28.718	18.700	18		91.285	21.738	9.808	14		78.529	45.943	24.096	12		53.668	32.575	33.009	11		13.968	80.037	82.817	9		68.027	55.436	43.168	19		49.212	15.549	9.608
17		53.382	380.555	7.429	12		54.659	26.279	20.744	18		58.906	24.052	10.938	14		81.539	35.839	26.996						11		7.896	85.208	78.213	9		72.196	71.026	43.417	19		65.343	15.456	7.902	15		55.766	22.671	17.678
17		35.154	332.990	6.378	12		134.960	31.218	20.336	18		84.027	28.073	11.782	14		71.063	36.541	24.041	13		101.200	36.095	37.298	11		11.557	76.769	77.706	9		97.369	48.593	37.738	19		86.021	16.588	7.401	16		100.549	16.343	11.845
17		58.620	659.812	6.065	12		98.281	28.232	20.847						15		117.122	37.953	21.061	13		70.581	46.689	40.517	11		9.759	106.505	87.997	9		74.320	46.701	44.961	19		82.164	21.609	12.850	16		48.743	16.187	12.276
17		67.871	775.300	5.730	12		119.950	31.046	22.868	19		46.372	20.992	8.592	15		47.128	41.819	21.358	13		50.124	45.278	40.013	12		34.411	35.143	22.115	9		57.551	58.692	40.729	19		100.575	20.012	9.431	16		70.594	17.754	13.678
17		50.398	648.317	6.447	12		105.760	28.462	17.702	19		45.825	22.413	6.742	15		70.007	40.084	24.139	13		68.301	45.247	37.089	12		56.626	41.895	20.185	9		94.190	43.196	48.343	19		61.486	13.719	13.303	16		42.880	12.756	14.111
18		109.096	221.031	9.751	12		105.409	33.460	20.830	19		61.265	24.470	7.902	15		59.011	37.896	23.593	13		136.966	49.344	40.262	12		36.274	39.562	20.761	10		129.839	37.752	33.401	19		134.126	15.269	9.262	17		98.633	15.177	9.321
18		80.249	345.503	8.732	12		7.831	20.792	21.354	19		55.154	23.768	8.091	15		141.722	38.843	25.672	13		73.773	50.797	45.135	12		60.939	36.881	21.638	10		112.145	33.095	33.059	19		114.803	15.558	8.595	17		153.579	15.019	8.946
18		42.216	445.705	7.092	13		63.675	24.290	11.731	19		36.235	27.086	10.930	16		145.618	44.060	42.570	13		50.594	43.944	43.939	12		49.434	38.347	22.184	10		85.773	35.761	27.505	19		94.242	17.864	10.024	17		112.862	13.512	8.313
					13		55.375	22.458	11.544	20		108.314	35.314	23.999	16		140.575	44.485	39.824	13		39.232	63.719	46.079	12		47.310	43.054	25.728	10		54.828	35.683	29.548	20		89.265	14.799	9.173	17		59.779	13.095	9.761
19		77.786	186.139	10.643	13		68.991	22.686	11.393	20		41.225	38.475	18.941	16		100.080	38.227	36.974	13		44.066	49.626	48.910	12		56.066	34.388	24.264						20		92.405	14.405	8.564	17		85.265	14.215	11.019
19		49.030	536.461	7.532	13		92.900	25.479	13.203	20		61.747	31.613	18.031	16		107.089	36.055	33.706	14		81.330	60.693	75.943	13		147.038	42.370	35.057	11		77.135	46.640	27.757	20		51.297	19.230	10.585	17		53.981	14.324	10.364
19		42.711	689.414	12.113	13		59.323	23.933	11.834	20		99.871	33.622	17.115	16		137.148	46.269	33.311	14		105.578	84.289	72.745	13		121.239	41.207	36.253	11		70.112	44.008	31.575	20		102.868	16.812	12.621	18		166.439	14.054	10.746
19		42.229	490.946	13.572	13		45.382	34.090	12.797	20		81.669	31.405	17.966	16		103.128	50.611	29.691	14		65.187	89.238	60.149	13		95.858	42.243	29.796	11		51.844	45.922	23.600	20		89.213	19.886	16.217	18		94.412	15.818	12.921
20		56.717	109.040	13.007	13		69.617	26.948	12.315	20		98.972	33.123	21.576	16		40.730	56.767	28.958	14		87.649	98.535	53.582	13		95.819	43.983	30.644	11		71.350	48.164	41.672	21		75.089	12.800	7.181	18		58.515	15.190	11.374
20		35.323	201.561	12.203	13		61.486	26.233	11.857	20		86.568	31.487	18.447	16		39.036	48.647	31.343	14		48.756	80.831	54.150	13		30.150	40.698	32.993	11		96.040	37.256	42.411	21		63.232	12.802	7.660	18		98.216	16.842	9.473
20		37.916	199.485	13.177	13		81.643	23.417	12.830	20		133.214	32.981	23.582	17		61.695	40.145	20.505	14		37.147	100.294	77.613	14		113.265	48.034	40.754	11		67.819	44.588	42.561	21		98.477	13.610	7.220	18		56.756	12.367	10.032
20		97.865	189.696	9.203	14		99.988	29.339	12.715	21		82.464	30.123	26.148	17		67.310	41.125	20.278	15		70.568	39.159	25.982	14		139.676	45.868	39.767	11		47.532	57.924	39.991	21		121.096	13.635	7.630	18		82.294	16.593	8.895
21		30.450	1140.496	11.313	14		78.425	37.108	12.862	21		89.604	28.253	23.409	17		60.118	36.969	18.849	15		81.591	45.119	29.018	14		74.881	45.603	34.912	12		92.444	58.452	53.468						18		50.698	16.378	10.236
21		40.378	747.871	12.081	14		71.428	41.013	12.468	21		128.523	28.362	27.421	17		95.702	33.707	17.005	15		40.652	36.522	32.889	14		88.848	50.929	37.161	12		19.805	79.899	68.396						19		67.115	14.076	7.845
21		64.678	872.287	14.067	14		82.307	28.317	13.831	22		79.363	38.061	27.545	17		96.496	28.377	18.201	15		79.350	36.566	32.138	14		130.569	60.249	35.532	12		19.323	73.446	61.150	22		77.578	17.388	10.724	19		62.476	11.266	6.563
21		63.024	934.098	12.089	14		59.584	26.850	17.764	22		92.509	32.289	27.666	17		126.217	26.145	17.778	16		55.336	52.072	36.292	14		134.139	47.824	37.474	13		74.216	40.221	25.048	22		65.669	16.073	10.721	19		42.437	12.074	8.163
21		68.144	1056.886	12.045	14		42.958	22.157	18.278	22		75.871	33.015	22.431	18		46.724	26.926	13.608	16		38.033	40.524	35.292	14		113.513	47.829	36.204	13		12.808	26.054	27.724	23		132.666	18.008	12.797	19		50.906	12.499	6.233
21		45.186	821.135	12.931	14		31.610	21.735	16.844	22		104.014	38.650	20.625	18		53.291	31.395	11.852	16		71.089	49.115	43.683	14		102.620	55.306	40.313	13		95.962	47.802	29.078	23		91.246	18.677	13.224	19		55.232	12.239	7.258
21		48.613	1006.832	13.841	14		65.447	22.463	16.410	22		157.331	38.467	16.143	18		49.695	23.715	11.786	17		60.196	88.164	87.563	14		92.262	51.825	41.680	13		32.991	37.425	32.019	23		101.187	18.720	12.843	19		66.490	15.331	8.281
21		35.844	642.892	14.538	15		62.125	30.643	22.798	22		73.030	39.079	19.651	18		60.757	31.367	12.049	17		57.747	84.949	90.676	15		85.708	43.011	42.013	13		85.799	43.318	30.353	24		70.685	21.428	17.737	19		55.792	14.606	8.783
21		34.163	409.952	12.829	15		66.411	33.794	22.544	22		76.522	43.473	24.061	18		73.304	27.497	12.077	17		33.408	89.730	86.929	15		57.421	58.075	42.742	13		59.844	46.030	29.896	24		78.633	20.133	15.746	19		49.890	15.329	8.448
21		21.707	373.304	12.300	15		88.001	31.906	15.461	22		52.939	41.556	26.656	18		54.281	22.507	12.337	17		63.584	87.790	77.002	15		102.972	56.506	52.522	13		85.864	47.119	24.892	24		97.982	23.261	15.545	19		111.637	16.978	10.075
21		31.753	298.103	23.580	15		97.617	28.678	18.226	22		70.672	43.718	28.707	18		82.568	24.946	13.278	18		75.454	48.117	34.220	15		80.744	47.873	41.873	13		130.764	51.454	25.947	24		102.816	20.319	16.624	20		70.372	17.371	7.285
21		31.753	298.103	24.183	15		111.650	32.590	26.281	23		74.385	29.933	23.435	19		104.588	33.714	26.360	18		39.245	55.216	27.838	15		55.519	50.816	36.274	13		97.995	47.792	25.163	24		83.936	23.215	19.875	20		124.158	14.752	8.567
22		39.688	516.679	6.989	15		121.591	37.252	18.784	23		109.187	30.103	21.806	19		39.180	35.680	30.494	18		37.356	43.551	31.997	15		45.330	43.563	41.273	13		64.170	47.501	27.047	25		72.770	20.285	15.868	20		123.507	12.685	8.363
22		68.027	560.420	9.201	15		93.487	36.393	19.056	23		55.688	27.400	19.091	19		53.799	34.888	26.950	18		101.565	49.166	30.450	15		82.633	48.045	58.678	13		58.542	40.765	28.045	25		107.819	18.694	16.438	20		77.460	15.570	8.942
22		76.105	487.553	9.411	15		98.933	40.879	16.886	23		65.864	30.778	22.375	19		78.398	34.215	25.233	19		100.809	31.696	22.170	15		86.164	50.543	58.570	14		47.310	66.543	53.825	26		95.063	20.452	15.182	20		70.021	16.509	8.576
22		57.812	487.715	9.603	16		74.438	27.723	11.010	23		117.200	31.920	23.134	19		129.409	33.893	23.147	19		120.054	32.545	19.758	15		87.532	47.259	65.870	14		48.313	63.060	47.383	26		95.962	22.645	13.514	20		76.223	14.528	9.437
23		41.421	375.552	10.569	16		49.238	26.871	10.103	23		105.265	32.709	20.601	19		140.797	32.220	20.348	19		137.565	28.095	18.296	15		110.295	51.717	48.473	14		94.438	45.354	45.169	26		108.171	20.494	16.418	20		63.349	14.934	8.571
23		89.161	499.904	11.875	16		55.271	21.028	9.778	24		57.408	29.853	17.222	20		86.985	27.482	18.481	19		61.616	33.783	22.776	15		120.236	61.041	44.619	14		40.352	52.643	48.098	26		73.135	22.234	19.399	20		73.434	12.886	8.255
24		106.282	303.198	11.958	16		62.398	25.058	10.539	24		93.343	29.678	16.013	20		104.431	24.324	17.235	19		64.757	27.673	27.304	16		56.783	36.155	30.160	14		95.246	54.151	48.842	26		104.549	21.739	20.101	20		51.883	13.222	7.835
24		61.538	337.940	11.551	16		94.308	28.344	10.327	24		79.154	26.424	16.891	20		68.235	20.900	17.624	19		45.199	35.379	26.898	16		78.177	44.946	37.655	14		40.756	52.250	54.758	26		30.567	23.769	16.914	20		131.337	13.574	7.412
24		62.164	253.623	10.591	16		38.854	24.874	10.220	24		145.487	39.723	24.461	20		61.695	22.305	18.184	20		74.281	55.178	37.435	16		122.008	40.987	34.484	15		80.757	54.711	38.660	26		160.445	23.920	23.672	20		65.473	14.905	6.650
25		62.489	371.474	10.053	17		74.438	27.723	11.010	24		83.324	38.830	24.147	20		97.291	30.106	19.575	20		104.588	52.875	40.573	16		159.207	44.533	33.618	15		79.454	49.556	36.436	26		45.551	23.585	25.257	21		86.672	12.584	8.497
25		62.802	373.776	11.894	17		49.238	26.871	10.103	24		117.331	49.672	22.199	20		94.959	24.002	22.309	20		55.271	53.353	44.337	16		172.289	47.748	39.805	15		147.833	55.424	32.689	26		89.278	23.142	26.111	21		58.737	14.034	8.137
25		71.793	350.642	9.451	17		55.271	21.028	9.778	24		89.474	41.223	21.840	21		56.170	22.835	16.316	20		114.725	51.283	33.223	16		179.664	56.798	36.961	15		53.486	47.856	29.441	26		82.333	22.340	21.662	21		87.011	13.327	8.461
25		77.200	330.866	10.923	17		62.398	25.058	10.539	24		52.600	33.353	21.662	21		35.961	30.129	14.705	20		94.399	43.247	39.924	16		108.458	46.319	38.599	15		92.757	49.979	31.466	27		70.920	14.283	10.925	21		67.480	17.719	9.265
25		58.424	335.774	9.237	17		94.308	28.344	10.327	25		79.793	24.666	21.911	21		36.691	26.157	14.906	21		120.575	45.843	51.286	17		88.092	37.502	35.408	15		91.128	55.475	31.513	27		114.230	16.271	12.038	21		108.314	14.187	9.087
25		73.004	469.767	11.995	17		38.854	24.874	10.220	25		49.082	32.136	19.147	21		66.385	23.959	17.668	21		68.913	52.580	47.266	17		117.995	38.565	34.639	15		83.428	49.279	33.813	27		112.666	16.283	13.024	21		127.950	13.397	8.950
25		52.509	469.913	12.604	18		120.575	25.298	12.755	25		59.323	32.294	20.821						21		92.027	51.140	42.048	17		83.115	44.482	31.428	15		144.158	56.413	44.481	27		83.819	19.169	13.624	21		72.327	14.833	8.476
25		115.767	488.438	11.828	18		35.375	40.015	12.384	25		78.385	29.432	23.071						21		101.330	48.090	43.106	17		106.099	46.190	32.934	15		105.317	57.156	47.359	27		72.926	17.821	12.610	21		74.034	12.330	7.951
25		51.453	309.185	10.628	18		49.994	34.985	12.733	25		88.366	29.133	14.248						21		140.510	58.336	42.180	17		66.985	45.963	35.535	15		72.275	67.388	47.990	27		122.125	16.376	15.518	21		109.565	14.490	8.034
25		53.590	261.853	11.553	18		42.750	36.577	12.296	25		66.854	25.162	12.964						21		162.556	66.806	45.838	17		58.789	51.888	40.572	15		140.966	58.077	43.231	27		62.867	19.203	11.510	21		54.242	12.946	7.850
					18		45.890	33.045	12.934	25		40.847	28.478	21.590						22		150.569	48.983	42.956	17		44.848	52.894	41.278	16		188.446	64.283	39.320	27		59.024	15.312	11.293	21		13.355	10.733	9.994
					18		60.965	41.865	11.937	25		91.728	25.769	15.683						22		101.500	55.926	36.463	18		70.346	43.961	38.351	16		179.116	50.215	50.621	27		92.275	21.899	13.018	22		96.262	12.886	8.629
					18		73.812	39.429	15.899	26		108.731	26.072	15.363						22		67.819	56.827	43.136	18		79.037	50.723	33.669	16		165.996	47.247	41.247	28		115.311	17.330	11.056	22		60.340	17.298	9.654
					18		34.567	31.112	16.121	26		60.835	22.033	19.928						22		59.962	41.025	36.910	18		68.327	42.846	34.010	16		33.720	50.456	48.270	28		118.138	17.896	10.859	22		62.959	17.903	11.043
					18		81.486	28.443	18.233	26		84.392	23.991	17.994						22		48.300	53.355	37.802	18		92.470	45.065	41.485	16		52.001	59.154	40.900	28		162.230	16.355	11.047	22		90.933	13.685	10.626
										27		64.092	24.054	16.278						22		32.235	59.440	42.455	18		132.914	42.585	46.292	16		75.793	60.828	50.318	28		76.105	14.792	12.278	22		54.841	14.020	10.040
										27		100.236	24.635	16.604						22		22.333	56.839	44.929	18		67.806	41.105	37.347	16		88.236	88.447	52.678	28		104.379	16.587	12.300	22		60.314	13.365	10.083
										27		73.851	29.743	14.978						22		133.135	53.431	43.065	18		132.288	41.041	46.270	17		59.610	61.194	28.587	28		64.952	16.340	12.318	23		147.298	11.864	10.016
										27		99.819	26.451	16.494						22		59.011	49.738	42.341	19		113.943	34.167	22.216	17		40.313	51.403	26.196	28		98.451	15.062	12.310	23		101.617	13.556	11.077
										27		117.839	31.250	16.884						23		97.865	66.619	58.052	19		122.842	28.108	21.724	17		37.356	50.149	27.830	28		119.559	14.137	14.415	23		144.810	14.007	11.899
										27		82.737	29.211	17.722						23		51.024	72.763	62.561	19		74.828	29.935	23.785	17		64.235	47.346	29.029	28		86.412	16.715	11.843	23		61.069	13.255	12.246
										27		52.053	31.257	15.831						23		41.773	64.784	65.609	19		74.763	31.608	23.479	17		127.728	46.162	31.425	28		45.395	14.282	11.403	24		42.450	27.266	18.875
										28		34.346	20.103	14.313						24		46.620	47.710	34.972	19		101.643	26.535	25.843	18		155.676	33.832	26.775	28		96.483	16.231	10.523	24		23.114	28.990	21.126
										28		85.526	18.664	14.003						24		21.642	56.337	37.026	19		113.669	22.244	23.155	18		106.699	36.106	23.930	29		152.693	14.399	7.109	24		45.603	23.354	18.327
										28		48.496	20.936	14.069						24		52.222	55.343	33.059	19		77.591	40.119	22.046	18		64.731	38.256	25.746	29		258.909	13.080	11.145
										28		70.099	17.196	15.325						24		104.301	50.717	34.065	19		177.905	32.403	21.936	18		52.157	39.869	25.835
										28		149.149	19.181	16.045						24		59.740	47.130	38.670	19		87.923	28.603	27.452	18		62.581	51.310	31.310
										28		65.265	19.981	18.068						24		114.191	53.672	42.941	20		120.406	35.292	29.035	18		29.290	54.206	33.713
																				24		84.353	36.380	51.738	20		90.907	31.998	27.753	18		63.141	57.920	35.364
																				24		106.256	35.867	52.087	20		134.321	33.982	23.708	18		59.480	62.758	36.546
																				24		148.211	43.285	51.865	20		114.034	38.922	27.930	18		34.242	47.410	38.142
																				24		121.604	40.977	47.186	20		114.725	37.987	25.981	18		75.636	57.119	33.483
																				24		42.854	47.161	41.961	21		70.711	38.070	34.821	19		46.046	50.050	35.039
																				24		88.392	51.552	39.295	21		101.982	35.159	38.242	19		90.229	41.439	35.140
																									22		77.942	41.282	39.515	19		80.848	56.147	30.985
																									22		80.210	37.245	40.042	19		70.933	56.597	34.614
																									22		93.096	56.361	42.420	19		56.287	55.550	29.429
																									22		61.499	57.290	45.488	19		90.672	59.276	38.383
																									22		59.792	56.103	47.682	20		79.363	58.439	44.824
																									22		80.991	69.389	47.214	20		36.522	43.882	31.884
																														20		62.007	55.078	35.718
																														20		111.207	45.085	37.178
																														20		85.161	47.772	38.938
																														20		140.289	41.331	37.525
																														20		85.304	48.298	35.950
																														20		56.522	50.156	35.650
																														20		68.483	47.050	46.140
