# Supplementary material for: Affinity-guided labeling reveals P2X7 nanoscale membrane redistribution during BV2 microglial activation
Source: eLife. 2026 Jan 9;14:RP106096. doi: 10.7554/eLife.106096 (PMC12788799; doi:10.7554/eLife.106096)
Supplement: Figure 4—source data 1. [file elife-106096-fig4-data1.xlsx]

## Sheet: Figure 4C
Panel C: Alexa 647 fluorescence (a.u.)		Note: Please use the provided RStudio code for Figure 4C to generate the histogram.
P2X7-mScarlet				K82A				K110A				K117A				K300A				K82A/K117A
Serie	Area	Mean	Background	Serie	Area	Mean	Background	Serie	Area	Mean	Background	Serie	Area	Mean	Background	Serie	Area	Mean	Background	Serie	Area	Mean	Background
1	60.835	81.118	5.586	1	38.111	86.440	11.061	1	296.773	340.625	23.817	1	106.360	92.155	13.702	1	389.321	278.111	59.913	1	63.701	38.249	10.002
1	91.024	88.180	5.500	1	38.476	85.751	11.393	1	241.723	278.540	27.258	1	72.483	95.382	15.139	1	469.752	192.691	58.937	1	90.918	32.930	10.338
1	44.131	103.103	5.358	1	43.128	150.021	11.436	1	121.018	441.770	28.824	1	42.528	49.652	13.863	1	237.033	243.868	60.230	1	58.964	29.283	10.244
1	81.369	220.848	5.473	1	19.570	145.687	11.317	2	319.913	210.523	72.662	1	65.812	42.336	14.358	2	273.606	255.220	54.584	1	73.444	29.809	9.715
1	30.424	87.739	5.753	1	75.558	84.770	11.545	2	363.197	331.892	74.303	1	63.245	78.013	13.643	2	406.221	195.537	57.821	1	84.052	39.286	9.817
1	57.278	174.687	5.903	1	20.964	93.875	11.442	2	189.071	303.190	48.792	1	37.916	59.957	12.389	2	332.005	299.601	57.124	1	55.790	49.020	9.746
1	47.649	147.284	5.726	1	52.027	143.357	17.056	2	385.530	351.338	62.789	2	88.197	143.728	18.111	2	215.599	174.627	54.686	1	67.159	51.266	10.087
1	24.756	129.324	5.946	1	53.199	229.547	17.636	3	741.431	194.246	78.381	2	115.884	231.858	18.177	3	398.650	181.198	80.753	1	37.980	24.139	9.482
1	31.701	268.485	6.686	1	59.949	164.838	16.472	3	533.532	175.532	87.843	2	74.359	83.476	19.315	3	249.150	221.627	79.416	1	100.571	50.341	9.611
1	17.785	516.355	6.891	1	88.197	175.983	17.296	3	522.326	326.460	98.422	2	169.449	98.111	18.506	3	194.622	216.720	80.412	1	138.474	39.474	9.480
1	37.408	201.041	14.736	1	68.131	88.795	18.139	3	788.832	250.166	84.835	2	105.474	105.533	19.012	3	681.951	151.202	82.025	2	46.666	84.841	12.227
1	61.812	512.209	13.445	1	100.796	50.641	15.951	4	348.695	147.142	47.135	3	111.441	100.191	9.713	4	721.482	202.787	48.737	2	59.029	90.102	12.214
2	28.274	252.229	12.500	1	115.806	40.509	13.930	4	495.642	236.026	49.762	3	59.831	147.420	9.267	4	557.076	179.986	50.276	2	99.126	74.944	11.133
2	61.630	203.279	9.635	1	180.628	77.756	16.414	4	406.703	189.356	49.102	3	96.040	168.854	10.016	4	287.261	205.442	50.550	2	45.749	46.279	11.816
2	13.329	135.017	12.708	2	53.486	76.041	10.792	5	752.857	245.622	39.802	3	103.376	67.942	10.087	5	319.327	235.714	79.287	2	86.388	38.895	11.690
3	49.695	257.499	20.046	2	97.187	99.740	11.884	5	438.938	184.594	39.070	3	86.789	151.329	9.828	5	330.428	252.749	79.509	2	126.911	97.488	11.395
3	37.421	234.605	19.568	2	119.624	58.823	12.042	5	576.373	245.064	43.917	3	130.595	120.426	9.930	5	220.902	223.304	85.535	2	60.320	68.235	12.773
3	68.105	243.156	19.787	2	79.506	79.079	12.272	6	339.510	188.488	57.925	3	71.571	132.910	10.017	5	297.854	405.225	83.803	2	78.387	32.149	15.185
3	36.808	245.093	20.636	2	72.131	62.048	11.496	6	405.491	228.989	64.064	3	64.170	87.708	9.263	5	435.954	314.616	83.117	2	85.266	42.755	11.489
3	72.249	228.141	19.818	2	126.321	57.838	10.996	6	342.637	213.924	71.568	4	104.940	36.669	14.470	5	293.125	164.669	77.796	2	77.884	46.064	11.297
3	35.075	254.977	20.551	2	113.409	60.827	10.819	6	269.737	198.250	70.556	4	103.063	84.489	15.355	6	318.298	201.394	90.432	2	121.452	44.233	10.828
4	55.011	825.372	6.921	2	98.751	41.084	10.643	6	350.858	133.467	58.121	4	92.340	56.722	15.855	6	204.589	136.400	92.874	3	108.869	100.628	20.931
4	84.848	516.886	6.568	2	105.995	49.414	10.832	7	360.200	267.068	82.429	4	78.151	82.713	15.388	6	196.850	179.765	78.256	3	76.980	96.482	19.292
4	34.411	280.528	6.042	3	75.727	55.662	20.990	7	418.025	332.986	66.027	4	68.639	124.201	16.049	6	246.635	254.415	84.112	3	77.006	68.162	20.053
4	65.174	336.420	6.499	3	94.464	60.868	20.698	7	625.533	307.706	61.602	4	44.418	52.958	18.414	6	432.566	218.047	79.956	3	70.579	107.568	18.558
4	34.567	276.717	6.498	3	108.145	72.723	21.225	8	303.900	201.353	65.718	5	81.890	112.636	13.674	6	319.001	179.925	78.880	3	55.596	88.254	18.347
4	34.567	276.717	6.008	3	78.125	59.470	21.025	8	443.277	288.232	67.586	5	68.809	129.899	13.491	7	406.585	379.842	68.852	3	72.334	113.378	18.911
4	70.568	348.965	6.391	4	96.093	71.706	12.553	8	245.098	266.791	62.876	5	112.770	74.061	18.008	7	550.535	205.483	65.836	3	103.772	42.095	20.498
4	50.424	288.475	6.825	4	88.952	61.693	12.591	8	242.753	207.186	61.460	5	77.460	140.781	18.378	7	303.014	148.443	65.990	4	80.994	41.015	12.518
4	30.750	265.435	7.002	4	117.305	50.324	12.348	8	167.833	165.032	64.823	5	128.888	160.699	14.625	7	434.091	200.598	64.563	4	60.745	44.564	12.880
4	55.936	297.866	7.366	4	41.747	54.095	13.237	9	339.431	213.642	44.937	5	112.432	51.964	15.734	8	384.748	212.336	90.756	4	86.737	55.130	13.057
4	37.981	327.210	6.784	4	67.297	40.131	13.130	9	383.693	385.171	43.632	5	92.496	55.696	19.716	8	197.657	233.091	85.359	4	101.604	65.261	12.984
4	11.648	284.688	6.703	5	57.721	67.913	13.710	9	305.646	214.004	47.330	6	85.747	65.554	10.102	8	164.471	263.009	84.253	4	82.891	58.342	13.391
4	10.502	275.022	6.826	5	47.362	99.346	13.917	9	688.791	149.509	44.271	6	63.115	141.846	10.182	9	461.374	339.925	80.142	4	95.035	53.488	13.581
5	64.509	336.117	7.438	5	56.913	104.866	14.721	9	482.235	179.969	44.250	6	50.789	66.140	9.961	9	279.913	228.295	77.766	4	74.915	52.365	12.770
5	31.140	401.963	6.945	6	90.998	47.671	12.583	10	210.439	248.000	60.481	6	86.516	65.225	9.901	9	459.772	248.592	77.478	4	51.028	55.618	12.616
5	37.043	361.167	6.907	6	100.966	144.671	12.500	10	273.255	291.937	60.860	6	61.551	118.748	9.969	10	250.701	297.215	60.677	4	67.456	33.616	12.445
5	33.799	296.153	7.177	6	40.274	56.105	12.469	10	273.854	194.689	57.615	7	36.926	43.463	11.176	11	347.132	266.997	64.339	4	78.942	57.083	12.889
5	36.887	461.015	10.865	7	81.786	72.119	16.520	11	409.204	152.823	62.420	7	65.265	50.311	11.512	11	239.508	197.374	66.078	5	93.512	34.935	18.365
5	65.760	500.612	11.363	7	102.542	52.574	15.689	11	298.884	208.460	66.534	7	107.793	96.754	11.400	11	211.039	372.114	59.881	5	74.206	33.101	20.311
5	21.720	685.329	9.760	7	81.643	49.620	15.881	11	301.594	304.789	62.229	7	93.070	106.100	11.662	11	175.586	194.933	63.088	5	91.667	34.074	18.036
5	24.548	481.919	11.204	7	91.389	80.536	15.838	11	276.160	288.914	60.461	7	72.353	58.175	11.002	11	251.222	199.481	61.807	5	70.102	37.204	19.254
5	19.245	312.393	11.012	8	36.122	29.806	12.273	12	653.429	312.414	49.905	7	61.226	64.447	12.097	12	266.922	185.900	76.915	5	125.659	36.415	19.919
5	16.339	407.910	10.567	8	39.026	96.675	12.698	12	330.623	209.906	48.736	7	54.203	45.676	12.274	13	268.551	198.408	67.950	6	78.232	37.661	19.069
5	31.101	313.926	10.366	8	37.826	91.754	11.381	12	357.595	229.529	46.995	7	51.362	38.735	11.204	13	268.342	211.217	77.364	6	76.348	56.647	18.376
5	31.974	415.357	10.246	8	48.976	146.697	12.158	12	249.854	304.349	47.482	8	59.597	128.119	9.154	14	401.660	140.432	42.503	6	73.819	64.048	19.629
5	65.239	437.538	10.454	8	46.795	134.737	15.566	13	474.547	196.939	23.204	8	61.773	241.292	9.123	14	247.626	252.173	45.983	6	107.256	58.019	19.306
5	23.049	371.722	10.618	8	35.167	113.049	12.445	13	385.113	341.041	27.957	8	53.199	349.029	9.829	14	194.387	288.894	51.895	6	111.205	45.112	21.057
6	27.193	535.017	10.700	8	18.893	76.213	11.566	13	284.786	193.431	23.494	8	90.568	135.203	10.111	14	214.909	132.522	43.773	6	69.534	54.731	20.988
6	37.277	635.719	11.236	9	41.104	82.892	16.541	14	399.810	251.834	50.053	9	87.741	162.113	9.913	15	130.829	222.529	33.305	6	89.757	48.055	18.709
6	39.271	445.355	10.660	9	70.876	118.586	21.226	14	495.108	235.552	50.482	9	46.424	105.453	9.832	15	162.439	147.448	47.151	6	78.542	93.563	21.292
6	25.108	434.318	11.315	9	60.384	93.909	14.491	14	306.688	206.558	48.514	9	58.698	183.597	10.501	16	284.760	318.051	55.672	7	143.482	60.140	12.208
6	28.000	325.085	10.691	9	25.643	108.221	16.472	14	347.366	294.327	52.206	9	62.581	111.146	9.573	16	164.211	226.058	56.217	7	98.713	38.383	11.144
7	118.125	629.910	34.915	9	51.699	58.973	18.463	15	210.622	159.958	15.674	10	94.242	222.300	12.806	16	259.209	269.371	56.380	7	100.597	52.091	13.960
7	157.970	755.945	28.009	10	77.367	102.465	24.235	15	283.170	454.739	32.463	10	30.254	115.348	12.778	17	225.241	241.463	30.962	7	38.651	38.331	12.178
8	36.045	166.349	15.323	10	100.545	55.430	23.980	15	169.396	206.882	14.719	10	48.587	149.345	13.642	17	171.077	209.159	28.752	7	59.197	88.260	11.254
8	9.524	101.291	14.737	10	68.695	42.322	24.794	15	200.563	269.773	20.352	10	39.258	180.192	12.260	17	251.170	132.040	30.770	7	97.913	34.336	12.742
8	29.773	156.564	14.553	11	54.267	63.915	18.527	16	548.399	291.172	57.446	10	52.183	105.731	11.399	17	276.773	168.168	26.066	7	71.186	26.801	13.189
8	53.286	208.670	16.076	11	53.260	43.313	18.759	16	276.108	220.498	57.865	10	62.112	139.167	13.135					8	59.063	32.057	9.821
8	36.561	172.403	15.807	11	52.486	34.799	12.795	16	326.663	210.255	59.743	10	31.974	147.355	10.971					8	52.483	37.418	9.913
8	30.444	168.278	13.918	11	64.449	43.825	17.354	16	475.472	242.894	60.632	10	87.402	464.329	11.324					8	86.920	36.284	10.217
9	62.965	559.740	8.193	12	109.360	112.008	10.609	16	243.430	168.133	57.121	10	43.388	640.917	11.955					8	73.864	21.177	9.585
9	35.232	555.497	9.549	12	60.887	78.479	9.674	17	581.819	269.139	55.513	11	49.330	184.352	17.229					8	94.633	25.932	9.489
9	29.024	263.728	9.314	12	40.549	36.725	9.120	17	499.290	266.517	43.420	11	34.671	416.017	16.462					8	60.222	36.115	9.277
9	27.630	265.793	9.986	12	53.841	80.906	9.468	17	523.356	181.496	47.509	11	30.658	173.601	16.408					8	77.174	28.304	9.248
10	20.326	211.941	15.580	13	56.719	146.565	9.071	17	382.676	195.491	41.662	11	49.447	234.120	17.747					8	128.784	29.208	9.191
10	69.186	295.815	17.332	13	34.896	51.891	8.855	18	330.207	259.065	38.324	11	30.515	226.863	17.944					8	70.581	35.464	9.356
10	27.256	337.791	17.229	13	39.516	77.576	8.554	18	190.152	258.288	37.409	12	36.926	109.289	12.772					8	56.092	35.618	9.334
10	75.961	383.501	18.748	13	50.770	92.580	8.949	18	345.477	269.645	26.164	12	48.313	73.838	12.705					8	91.871	37.348	9.215
10	30.870	385.222	16.842	14	80.245	73.690	11.874	18	256.473	124.782	35.543	12	42.255	76.673	13.950					8	59.467	35.576	8.594
10	42.020	197.316	16.395	14	62.513	95.030	11.831	18	306.441	212.348	27.465	12	35.544	134.592	13.758					8	68.991	30.355	9.601
11	78.064	221.726	16.273	14	58.229	81.394	11.776	18	316.825	296.624	33.613	12	50.971	82.176	13.133					8	93.708	32.597	9.736
11	80.310	416.783	14.910	14	81.420	79.272	10.041	19	273.476	158.489	48.151	12	49.343	79.274	13.711					8	87.702	31.492	9.745
11	49.092	251.651	15.651	15	57.997	43.060	13.737	19	367.901	277.408	33.284	12	46.164	153.215	13.464					9	76.014	42.406	13.152
12	64.281	392.911	10.974	15	78.439	40.568	13.097	19	328.734	175.963	53.243	12	35.922	110.033	14.468					9	60.392	37.824	12.365
12	71.225	463.399	10.691	15	49.376	40.429	13.501	20	472.736	340.828	57.043	13	61.838	118.725	10.286					9	82.529	45.971	13.471
12	52.525	303.216	10.557	15	62.707	48.387	13.236	20	261.710	217.324	49.585	13	34.619	116.749	10.904					9	59.701	38.677	11.667
12	30.986	309.774	10.783	15	42.265	40.577	13.281	20	632.725	258.176	19.900	13	62.255	126.452	12.896					9	75.701	48.283	11.569
12	50.460	389.518	11.326	15	39.155	38.889	12.659	20	338.571	228.156	48.449	13	72.079	217.981	12.028					9	69.030	44.269	11.942
13	38.703	232.905	11.058	16	26.469	53.364	9.378	20	218.531	185.354		13	69.682	136.720	12.253					9	77.721	52.313	11.454
13	24.869	309.047	10.789	16	25.991	51.605	9.332					13	71.089	189.521	12.424					10	81.591	65.129	8.975
13	34.083	252.406	11.140	16	41.271	57.127	9.722					13	34.971	201.964	13.389					10	98.725	77.981	8.981
13	60.474	167.732	10.963	16	51.376	49.095	9.294					13	82.151	217.935	11.050					10	63.753	42.975	9.062
13	43.556	165.052	11.706	16	45.840	44.798	9.450					13	62.411	368.531	11.387					10	24.704	42.267	8.735
14	79.239	254.406	23.776	16	38.690	66.441	8.825					13	71.545	193.016	10.381					10	158.777	65.091	8.987
14	58.835	320.469	24.307	16	60.836	103.836	9.185					13	23.531	78.298	10.869					10	56.313	50.649	8.881
14	46.433	341.386	32.462	16	58.681	59.943	9.678					14	53.994	87.854	11.092					10	236.759	41.211	8.686
14	33.438	282.351	26.740	17	49.995	80.061	11.031					14	46.007	122.758	11.050					11	71.115	66.699	12.910
14	58.410	311.692	24.912	17	48.447	67.914	11.958					14	49.577	140.095	10.611					11	82.607	30.527	13.342
14	45.207	363.174	22.872	17	48.150	37.121	11.240					14	23.349	102.438	10.565					11	78.216	35.525	13.706
				17	41.129	55.466	11.718					14	41.369	54.317	11.441					11	148.953	56.521	13.304
				17	42.071	93.422	11.439					15	31.779	78.431	8.871					11	106.308	43.076	11.273
				17	44.175	111.369	11.481					15	28.469	89.270	9.102					11	96.887	31.508	10.658
				17	32.018	89.239	11.181					15	54.125	77.875	8.936					11	63.102	35.584	10.207
				17	31.489	44.077	11.358					15	19.753	46.786	9.159					11	52.848	37.688	10.606
				18	58.100	143.113	9.944					15	36.053	63.567	8.955					11	43.740	41.455	10.600
				18	40.639	96.068	9.950					15	44.769	82.620	9.031					12	75.975	44.298	8.604
				18	46.059	79.674	10.379					16	22.750	68.282	12.755					12	73.239	33.276	8.908
				19	53.222	131.360	19.131					16	25.017	83.928	12.447					12	92.262	48.051	8.495
				19	60.100	65.283	19.084					16	29.694	78.652	12.404					12	77.955	35.968	9.044
				19	33.631	67.902	20.707					16	23.414	64.396	12.572					12	121.800	59.671	9.413
				19	14.106	62.911	21.863					17	45.082	73.287	11.908					12	55.597	27.410	9.232
				19	50.421	57.994	22.115					17	39.349	62.690	11.908					12	77.552	32.086	9.048
				20	32.315	51.018	9.944					17	27.245	166.422	10.665					12	112.002	61.586	9.058
				20	27.579	53.590	9.742					17	32.222	63.040	11.190					12	64.405	51.540	8.497
				20	64.411	43.337	9.492					17	53.160	102.703	10.864					12	54.776	25.565	9.588
				20	48.769	38.513	9.339					17	37.004	79.603	10.693					12	84.066	43.970	9.174
				20	51.892	44.536	9.718					17	44.222	100.475	10.895					12	44.509	62.443	9.050
				20	125.337	87.764	9.690					17	55.154	180.427	11.618					13	76.666	66.512	9.385
				20	28.960	38.285	9.463					17	52.027	250.565	11.766					13	80.731	44.422	9.734
				20	67.688	68.938	9.533					18	29.342	93.627	11.210					13	64.457	78.656	10.268
				20	67.727	66.164	9.508					18	41.864	192.163	10.761					13	54.164	51.268	10.607
				20	32.896	39.905	9.756					18	67.102	113.883	10.503					13	162.869	54.419	10.554
				20	59.248	84.637	10.075					18	28.456	152.065	10.821					14	158.673	43.156	10.320
				20	66.359	108.430	9.455					19	68.734	92.321	8.199					14	113.513	22.105	11.194
				20	29.463	93.882	10.165					19	30.147	54.517	8.873					14	67.636	38.685	10.687
				21	73.509	70.631	10.842					19	36.251	63.676	9.447					14	167.651	62.661	9.936
				21	56.913	58.402	11.832					19	29.540	154.471	8.654					14	66.346	39.283	10.504
				21	66.501	80.047	10.809					19	21.836	197.857	9.956					14	63.532	30.697	10.360
				21	59.984	64.601	10.430					20	81.342	196.194	18.570					14	103.663	40.682	10.338
				21	41.839	58.459	10.616					20	40.174	164.088	20.888					15	69.773	101.544	17.644
				21	48.860	42.512	11.065					20	70.128	66.878	18.513					15	81.004	105.430	19.873
				22	135.816	154.074	12.432					20	99.474	164.148	9.266					15	67.845	79.598	11.106
				23	53.389	85.677	13.166					20	66.992	212.200	9.125					15	84.392	77.855	10.711
				23	97.900	46.413	13.254					20	90.234	205.142	9.308					15	76.705	85.835	10.879
				23	169.357	109.534	14.360					21	57.132	57.346	9.128					15	84.627	91.023	9.937
				23	181.114	108.067	13.084					21	60.500	163.291	8.967					15	75.780	82.706	10.676
				23	150.386	97.467	12.358					21	38.329	141.405	9.384					15	102.269	86.890	10.983
				23	92.570	64.204	12.711					21	73.612	219.923	20.346					15	64.261	54.990	11.065
				24	52.718	40.825	13.690					21	76.451	208.335	19.970					15	76.236	45.003	10.999
				24	104.107	45.401	13.108					21	33.502	61.251	12.545					15	86.073	50.284	10.763
				24	84.517	45.708	14.483					21	33.218	49.708	11.775					16	86.516	73.419	9.754
				24	69.056	56.369	13.764					22	22.094	180.693	8.309					16	100.809	73.748	9.528
				24	58.319	41.763	16.206					22	19.990	185.872	8.164					16	159.833	68.281	9.431
				25	53.686	54.911	18.582					22	17.345	96.461	8.379					16	63.910	62.647	9.338
				25	98.081	55.172	18.581					22	32.741	99.412	8.220					16	80.744	55.314	9.448
				25	79.084	76.003	19.399					22	20.636	122.260	8.289					16	59.128	54.844	9.414
				25	64.733	104.388	18.620					22	20.636	106.056	8.315					16	97.109	40.535	9.252
				25	62.023	106.335	19.087					22	20.958	170.494	8.415					17	172.146	51.219	9.943
				26	79.458	193.337	8.436					22	16.635	136.891	8.334					17	131.129	54.800	9.618
				26	137.713	180.504	8.529					22	29.256	122.425	8.444					17	78.855	43.616	9.371
				26	70.786	160.473	8.624					22	18.545	94.138	8.302					17	56.717	26.075	9.123
				26	72.102	91.737	8.268					22	8.879	166.576	8.244					17	56.053	23.407	9.843
				26	53.660	45.134	8.538					22	21.733	192.969	8.443					17	133.122	39.525	10.437
				27	38.651	88.633	16.155					22	26.107	187.243	8.422					17	129.044	49.853	9.860
				27	58.281	61.865	15.836					22	22.623	161.536	8.201					17	73.890	51.253	9.609
				27	51.725	54.716	15.561					22	36.754	111.646	8.248					17	71.610	57.247	10.083
				27	73.251	66.066	16.272					22	28.314	108.256	8.381					17	40.548	43.458	9.804
				27	59.274	46.501	18.821					23	39.310	114.420	7.797					18	55.467	51.719	9.497
				27	46.588	44.808	16.793					23	29.734	61.050	8.113					18	50.255	68.771	9.279
				28	61.804	77.030	9.530					23	17.383	137.569	7.849					18	83.076	76.926	8.943
				28	56.616	53.543	9.254					23	58.706	136.581	8.144					18	86.907	75.585	9.389
				28	45.788	37.476	9.108					23	43.723	136.593	8.710					18	48.379	48.749	9.411
				28	28.998	18.530	9.144					23	52.783	138.778	7.822					18	121.266	57.520	9.519
												23	25.385	143.060	8.137					18	87.428	43.227	9.318
																				18	99.259	40.612	8.457
																				18	105.200	66.278	9.362
																				18	98.477	54.694	8.495
																				18	83.193	36.265	10.165
																				18	85.760	45.762	10.518
																				18	185.788	49.591	10.180
																				18	66.789	41.804	9.549
																				18	65.799	43.114	9.896
																				18	96.496	38.987	10.114
																				19	75.638	38.342	9.739
																				19	67.379	22.193	9.746
																				19	81.652	54.162	9.205
																				19	82.543	48.542	9.951
																				19	56.848	45.734	10.145
																				19	72.050	39.811	10.489
																				19	52.822	29.517	9.072
																				19	56.061	29.703	9.662
																				20	69.457	43.432	11.797
																				20	64.217	41.701	11.487
																				20	207.066	73.061	11.552
																				20	85.988	55.974	11.865
																				20	46.072	35.393	11.859
																				20	83.807	83.331	11.604
																				20	43.181	83.235	11.887
																				20	114.264	72.950	14.057
																				20	82.607	41.295	12.452
																				20	67.211	46.863	12.901
																				21	191.683	74.077	18.390
																				21	76.993	85.065	19.249
																				21	113.451	83.842	20.077
																				21	68.011	80.519	21.496
																				21	59.210	98.944	20.047
																				21	92.699	47.631	19.673
																				22	80.271	49.347	13.109
																				22	100.610	46.405	12.016
																				22	66.333	62.755	13.412
																				22	80.491	55.834	12.756
																				22	112.625	46.237	13.195
																				22	79.807	54.598	13.776
																				23	98.339	33.524	20.216
																				23	115.038	31.391	18.484
																				23	128.305	34.817	18.276
																				23	77.768	33.725	18.244
																				23	65.572	34.341	18.931

## Sheet: Figure 4E
Panel E: Current inhibition (%)
X7-uP	Control
95.5555	-16.2
97.7815	-14
99.5261	-11.4631
93.4038	-10.9774
91.1865	-4.69816
95.9182
94.6427
