# Supplementary material for: Affinity-guided labeling reveals P2X7 nanoscale membrane redistribution during BV2 microglial activation
Source: eLife. 2026 Jan 9;14:RP106096. doi: 10.7554/eLife.106096 (PMC12788799; doi:10.7554/eLife.106096)
Supplement: Figure 5—figure supplement 1—source data 3. [file elife-106096-fig5-figsupp1-data3.xlsx]

## Sheet: Feuil1
Panel D: Alexa 647 fluorescence (a.u)		Note: Please use the provided RStudio code for Figure 5-figure supplement1D to generate the histogram.
X7-uP+Strept-A 647				X7-uP+Strept-A 647+AZ10606120				X7-uP+Strept-A 647+A740003				Strept-A 647
Serie	Area	Mean	Background	Serie	Area	Mean	Background	Serie	Area	Mean	Background	Serie	Area	Mean	Background
1	177.853	96.011	15.391	1	26.956	25.283	12.642	1	57.372	46.014	23.103	1	54.669	20.506	13.628
2	113.774	85.021	14.816	1	34.564	24.825	12.663	1	58.566	48.760	21.207	1	35.192	17.025	13.569
2	136.640	123.695	14.565	1	35.229	34.269	13.925	1	66.419	40.634	21.934	1	41.750	18.246	14.127
2	119.793	96.661	13.835	1	30.689	28.253	15.628	1	34.787	40.912	21.757	1	34.969	16.981	13.581
2	127.702	97.157	14.700	2	40.901	21.381	8.098	2	32.839	55.728	24.583	2	68.924	20.891	13.638
2	101.070	118.823	12.804	2	40.859	23.020	7.973	2	27.135	56.382	23.884	2	49.198	20.947	13.577
3	160.875	78.030	16.324	2	30.960	20.753	7.768	2	31.596	53.083	24.481	2	34.626	19.088	14.348
3	109.865	131.128	13.509	3	21.661	38.090	16.648	3	44.197	47.880	24.685	2	34.548	20.352	14.030
3	201.215	128.543	14.868	3	27.143	34.149	15.219	3	31.081	60.541	24.822	3	43.508	19.709	13.978
3	142.751	66.299	14.968	3	19.818	35.947	22.238	4	30.265	42.233	16.594	3	48.386	21.863	13.555
3	107.220	112.104	13.313	4	26.597	34.065	23.411	4	26.378	43.057	16.860	3	33.981	22.285	14.161
3	97.226	117.036	13.841	4	28.375	43.277	22.243	4	28.534	44.820	16.318	3	49.312	22.876	13.619
4	109.643	73.075	15.042	4	29.040	38.363	19.961	4	30.282	46.984	16.408	3	39.410	21.266	14.321
4	97.109	91.692	11.568	4	26.507	35.049	17.170	4	25.371	53.443	15.975	3	50.629	22.346	13.819
4	157.461	71.754	15.397	4	30.773	32.091	18.707	5	35.729	46.213	18.560	4	47.589	19.145	13.494
4	176.432	107.070	13.647	5	34.225	33.200	12.757	5	26.692	46.725	16.486	4	39.050	20.681	13.679
5	199.521	113.259	14.227	5	28.627	33.267	12.921	5	31.389	48.513	16.517	4	39.526	20.240	13.903
5	154.790	94.845	12.733	5	29.234	31.415	12.136	6	41.320	48.646	16.148	4	30.447	22.666	13.110
5	116.197	73.993	12.938	5	22.193	31.630	12.864	6	27.294	50.813	16.177	4	44.644	18.927	13.453
5	111.871	79.493	14.090	5	22.993	37.204	12.263	6	29.974	43.269	16.526	4	38.092	19.788	13.312
6	129.305	143.300	11.065	6	37.752	22.117	11.210	6	23.299	52.957	16.601	4	51.830	18.757	13.784
6	124.041	119.549	12.425	6	27.869	30.085	11.933	6	28.401	45.407	16.533	4	39.931	18.216	13.223
6	98.594	111.932	12.388	6	33.661	31.174	11.829	7	26.061	51.656	16.149	5	52.985	20.027	13.613
6	53.747	188.996	18.031	6	41.914	31.735	10.643	7	30.605	43.086	16.768	5	34.422	19.587	13.545
6	91.871	113.118	11.280	6	37.187	29.793	11.980	7	26.485	46.464	16.251	5	39.698	21.837	13.893
6	144.510	176.802	10.287	7	34.745	32.045	13.211					5	35.341	19.003	13.856
6	122.386	91.542	12.188	7	31.031	30.999	14.122	8	38.349	42.063	15.046	5	41.375	18.461	13.509
6	89.995	105.303	11.532	7	35.184	32.027	13.178	8	33.002	46.334	18.337	5	28.087	20.080	13.162
7	166.322	119.780	11.088	7	23.138	34.914	16.673	8	29.453	45.162	18.074	5	48.781	20.637	14.161
7	161.918	80.223	12.388	7	23.361	34.912	14.158	8	41.982	43.315	17.303	6	48.480	22.853	13.816
7	169.058	71.257	12.089	8	31.792	28.930	13.429	8	28.266	42.735	21.603	6	36.335	22.681	14.237
7	68.301	75.119	11.881	8	25.642	29.596	13.629	8	26.604	41.581	19.762	6	34.402	21.648	12.956
7	89.487	128.690	12.542	8	39.520	27.597	14.060	9	49.145	37.139	16.963	6	32.382	21.506	14.010
7	89.930	84.120	10.930	8	41.266	33.763	13.757	9	55.712	42.969	15.873	6	55.523	22.060	14.126
7	87.649	114.438	12.351	8	28.237	33.034	14.892	9	40.014	37.411	16.562	6	62.207	21.367	14.111
8	125.630	210.634	12.834					9	27.817	39.086	16.532	6	31.758	19.012	13.482
8	106.842	226.910	14.509	9	92.512	45.297	27.382	9	33.173	35.902	19.467	6	41.475	22.000	14.308
8	129.266	87.391	15.970	9		48.481	22.813	9	31.244	45.209	18.789	6	40.530	21.443	14.084
8	35.688	277.060	13.967	10	74.149	44.659	22.777	10	26.478	40.874	26.072	6	38.128	22.031	14.280
8	100.106	71.518	14.283	10	88.127	45.535	23.623	10	37.410	49.067	25.380	7	76.906	20.068	13.917
9	85.838	151.750	10.000	10	62.701	38.561	24.302	10	28.727	47.528	23.289	7	53.979	22.082	13.558
9	94.829	164.331	8.796	10	65.137	40.177	25.453	10	37.897	47.508	22.920	7	56.708	21.249	13.670
9	137.670	171.335	9.626	11	39.517	47.927	34.980	11	55.728	42.030	17.380	7	47.331	21.493	13.172
9	113.669	87.124	9.493	11	74.471	48.585	24.980	11	37.968	51.446	20.369	7	44.385	20.458	13.503
10	179.455	193.633	10.692	11	41.863	45.978	33.749	11	35.509	41.726	20.587	7	55.947	19.752	13.936
10	119.598	73.326	10.097	11	39.149	42.762	34.515	11	42.198	47.873	18.461	7	46.246	20.789	14.150
10	156.380	79.867	9.282	11	81.948	38.444	19.674	12	39.904	40.624	13.296
11	113.748	115.387	15.393	12	108.161	40.131	15.534	12	46.354	42.731	14.092
11	136.119	227.926	15.707	12	54.521	41.949	15.426	12	59.174	41.872	14.891
11	74.985	112.348	13.430	12	72.994	45.362	15.992	13	54.511	35.218	11.599
11	93.174	108.576	14.868	12	55.454	38.857	19.203	13	41.972	35.520	10.854
11	101.747	101.863	14.867	13	79.573	51.017	23.401	13	35.067	44.404	12.731
11	95.363	164.792	14.660	13	74.442	39.084	21.563	13	31.425	36.638	10.644
12	99.650	113.782	15.927	13	58.364	48.775	27.322	13	54.005	35.058	12.376
12	150.009	164.066	13.767	13	86.981	39.717	28.945	13	21.067	40.393	10.817
12	123.337	101.388	18.595	14	84.000	58.413	49.641	14	35.842	37.968	14.408
12	93.031	126.869	16.503	14	112.436	49.557	42.466	14	31.231	38.182	15.310
12	101.278	99.378	14.866	15	29.889	41.913	17.440	14	32.528	36.406	16.980
13	119.910	86.406	19.904	15	22.680	41.816	19.497	14	45.083	36.329	17.492
13	90.933	101.399	17.303	15	24.245	47.844	19.089	14	27.888	35.828	18.307
13	92.822	107.327	13.526					15	30.579	40.133	12.535
13	104.588	125.747	18.198	16	68.435	29.050	13.838	15	36.707	36.431	12.040
13	112.731	110.253	17.257	16	49.441	28.917	12.170	15	28.379	38.305	10.826
				16	30.113	35.001	11.423	15	49.746	38.325	12.872
14	24.032	72.617	12.143	16	22.341	36.259	11.500
14	25.507	87.604	11.714	16	63.868	29.303	11.823	16	43.734	37.662	19.484
15	29.192	80.066	14.319	16	42.116	31.127	11.159	16	47.374	35.416	19.041
15	41.059	81.673	14.062	17	57.397	34.522	16.580	16	46.496	35.843	18.456
15	27.885	74.000	12.726	17	66.383	34.154	16.819	16	40.511	42.701	19.892
16	31.554	68.245	11.518	18	112.571	46.306	33.247	17	19.828	40.940	26.980
16	32.334	57.260	11.608	18	53.089	52.835	29.322	17	45.015	37.985	23.306
16	28.259	59.843	11.596	18	49.337	49.283	29.946	17	40.582	41.606	23.528
16	24.445	66.280	10.958	18	53.306	55.415	29.722	17	40.630	42.814	27.682
16	21.790	63.611	11.508	19	50.289	50.812	23.970	17	30.047	41.148	24.322
17	34.771	73.802	10.160	19	67.163	49.083	23.887	18	45.515	34.619	17.132
17	41.798	68.580	10.319	19	50.315	48.079	27.816	18	24.403	35.354	16.699
17	31.050	72.818	10.465	19	60.100	45.383	27.157	18	15.236	32.733	18.271
18	26.891	72.974	14.917	20	50.966	47.648	28.580	18	27.540	35.002	19.547
18	18.892	74.585	14.329	20	34.066	42.136	21.324	18	48.587	38.264	15.841
18	32.560	83.279	14.409	20	42.119	56.186	27.677	19	37.968	30.121	18.843
19	32.080	89.629	13.463	21	63.985	52.628	29.447	19	46.354	36.230	17.285
19	24.503	86.222	14.295	21	69.555	46.686	29.691	19	25.162	38.878	17.053
19	30.114	68.974	11.845	21	48.612	49.528	30.754	19	40.288	38.163	16.294
19	30.779	68.994	15.110	21	32.842	54.391	32.241	19	36.842	39.510	22.857
19	26.610	72.501	14.320	22	73.284	41.295	22.834	20	42.911	32.728	14.845
19	27.298	73.972	13.874	22	40.284	47.402	22.582	20	37.284	31.169	13.377
20	25.187	105.608	14.187	22	41.808	37.007	22.294	20	39.198	34.352	11.867
20	28.553	102.539	13.565	22	80.409	39.458	20.384	20	42.611	31.501	16.026
20	26.201	101.104	15.018	23	48.451	43.713	24.097	21	31.776	46.592	27.749
20	35.606	71.623	14.946	23	43.365	37.373	23.946	21	17.353	44.218	26.024
20	28.946	102.838	15.773	23	43.077	39.751	21.591	21	32.538	42.173	29.147
20	32.344	75.030	16.283	23	56.284	41.191	23.726	21	26.349	41.712	29.328
20	29.208	78.976	15.350	24	55.526	47.469	25.848	21	20.038	52.417	28.479
21	27.330	82.598	15.802	24	52.655	55.153	23.920	21	43.483	51.059	31.801
21	27.707	83.181	14.865	24	54.597	49.845	25.428	22	27.769	33.055	11.276
21	37.807	66.734	16.225	24	77.661	48.511	24.267	22	28.995	30.206	12.835
21	27.672	90.425	15.613	24	57.682	49.737	27.012	22	38.465	33.362	13.377
22	24.755	86.179	17.582					22	52.166	28.388	13.953
22	33.493	80.556	15.860					23	35.048	22.610	9.245
22	35.135	89.908	16.821					23	35.616	21.859	9.980
22	31.676	74.640	17.430					23	52.998	20.337	9.608
22	23.009	93.118	18.087					23	40.101	23.136	10.337
22	28.462	84.053	18.310					23	57.641	25.745	10.100
22	18.408	78.355	17.081					23	34.212	22.504	9.719
22	29.163	83.657	16.856
22	13.978	96.504	16.658
23	24.742	64.786	12.084
23	24.474	62.272	11.412
23	27.065	59.599	11.250
23	16.340	60.282	11.838
23	34.158	65.334	12.108
24	31.066	66.058	10.108
24	21.883	95.443	10.326
24	25.849	86.505	12.228
24	27.101	58.979	12.764
25	34.103	96.609	9.513
25	29.485	94.983	9.163
25	26.410	77.922	10.544
25	19.295	72.161	10.494
26	38.930	64.267	11.665
26	28.266	50.988	12.350
26	41.395	63.036	11.644
26	26.268	76.184	10.849
26	25.778	66.353	13.299
27	34.232	120.026	17.214
27	40.717	93.261	16.327
27	30.124	119.222	16.817
27	29.208	73.295	15.061
27	14.701	86.244	15.747
28	37.871	96.503	12.623
28	19.644	75.179	11.359
28	25.145	88.668	12.120
28	16.424	65.232	12.485
29	41.053	96.111	11.357
30	28.353	93.567	13.403
30	27.504	79.617	13.428
30	24.377	78.136	13.283
30	19.799	66.769	14.221
31	35.196	72.289	11.143
31	26.030	77.945	10.865
31	22.103	68.440	11.163
31	37.407	68.996	10.370
32	25.923	84.546	14.432
32	19.299	73.229	14.043
32	26.988	90.908	15.297
32	18.137	84.552	15.318
32	35.480	87.778	14.920
