# Supplementary material for: Affinity-guided labeling reveals P2X7 nanoscale membrane redistribution during BV2 microglial activation
Source: eLife. 2026 Jan 9;14:RP106096. doi: 10.7554/eLife.106096 (PMC12788799; doi:10.7554/eLife.106096)
Supplement: Figure 5—figure supplement 2—source data 1. [file elife-106096-fig5-figsupp2-data1.xlsx]

## Sheet: Figure 5-figure supplement 2B
Panel B: # locs/µm2
Control	(+)X7-uP
0.004	0.388
0.001	0.429
0.005	0.716
0	0.7
0.021	0.627
0.001	0.737
0.006	0.876
0.005	0.183
0.009	0.663
0.001	0.691
0.01	0.505
0.001	0.686
0.001	0.586
0	0.3
0.095	2.362
0.054	0.65
0.099	0.534
0	0.377
0.284	0.767
0.022	0.358
0.073	0.586
0.098	0.24
0.078	0.513
0.048	0.253
0.058	0.837
0.097	0.432
0.014	0.689
0.011	0.465
0.019	0.416
0.01	0.564
	0.489
	1.049
	0.323
	0.566
	0.504
	0.516
	0.55
	0.454
	0.762
	0.307

## Sheet: Figure 5-figure supplement 2F
Panel F: Average intensity per sub-pixel
Untreated	LPS	ATP	LPS+ATP	BzATP	LPS+BzATP	MßCD
9.75	9.7	9	79.3333	6.75	5.61538	4.33333
6	6.5	4.5	71.7273	11.6667	4	10.5455
8.54545	4.5	18	5	10.25	5	4.57143
27.2222	5	10	5.5	7	4.5	65.8333
10.1429	9	16.5	4	9.5	8	4
5.66667	4.5	24.8889	6.75	7.14286	5.33333	5
4.5	4.5	5	4.16667	6	4	40.6
7.42857	5.75	5	6.33333	11.8421	7.5	8.1875
7.125	18.25	4	6.6	4.6	11.8333	9.47059
6	4	14	5.5	7	4.5	6.71429
11.25	6.2	5.66667	7	10.25	8.66667	8.5
6.2	6.25	6.5	5	8.5	4.66667	8.8
5	12.625	5	4	8.5	5	8.5
8	5	5	8	11	5.2	4.5
11.4286	5.5	6.5	7.66667	12.5	7	11
6.5	5.66667	7.2	6	17	7.88087	5.5
5	6	7.33333	5	4.33333	7	4
8.75	21.5	9.85714	15.2143	14.2	5.5	5
4.5	6	12.25	4.33333	8.55556	9	6
7.75	8.33333	10.3333	19.6875	8.75	6.66667	7.75
14.4	5.25	5.5	4.75	12.3333	6.17647	6.38462
8.4	6.8	4.66667	4	10.8	5.4	26.5
5.33333	9	14.4	5	7	8.88571	4
11.6667	7.5	13	7.57143	8.6	7.94118	9.5
4.5	13.35	6.5	8.4	15.5	4.33333	18.6667
7.2	4.66667	4.66667	4.66667	9.5	4.66667	10
19.9091	10	7.33333	5	5.75	5	7
8.33333	15.4545	4.33333	7.4	4.33333	5.65217	14.25
5	8	10.5	5	8.66667	4.66667	5
5.25	6.5	5	4.5	4.5	7.6	17.3929
11.875	11.1	5.5	5.33333	7.5	12.6667	5.66667
6.25	5.5	7	14.8667	4.5	6	7.5
5.5	6.25	14	5.33333	11.5	5	9.5
12.5	20	4.66667	12.9904	5	5.71429	15.1111
7.66667	10.375	15	7	8	6.33333	7
4.5	10.75	8.4	6.21875	5.33333	7	15.125
11.7	12.6471	10.1667	4	11.3333	6.5	9
11.5	4.5	6.09091	7.75	5.5	6	7
8.33333	6.25	9.2	11.4444	10.4	6.14286	10.9333
6.33333	11.05	13.4	5	5.6	13.1429	9.1875
5.25	5.25	5	7	10	6.75	6
10.6667	4.5	10	5.5	12.5	5.5	6
5	4.75	10.6491	9.97619	7.5	10.5	5
4.66667	9.33333	7.5	6.375	7.375	20.2857	11.4
4.5	5.33333	7.5	5.33333	5.5	11.1099	10
22.0625	25.8333	13.2	7.71429	6	5.16667	7
7.71429	9.66667	10.6667	4	4.4	5	7.18182
19.875	5	5	8.8	5.14286	6.4	23.8
9.33333	10.3333	8.16667	5.5	13.2	6	6
10.1111	13.2	4	14.2692	6.66667	4	7
7.5	9.16667	11.4759	6.33333	8.33333	4	7.66667
11.35	10.2857	5.25	7.73418	9.6	4.8	4.66667
9.15385	14.8571	5.66667	6.28571	4	4.2	8.625
5.25	6.4	9.25	5.75	12.0769	4.25	9.5
8	4.33333	6	4.5	6.33333	17.3509	6.5
6.6	5.25	6.66667	4	20.5	8.375	17.1818
7.5	5.75	7.19231	4	9.66667	4.5	5.5
9.96552	7.57143	8.5	11.8571	20.2	7.19	17.2
5.5	7.8	5	7	8.33333	9.36	7
8.5	5.5	5.4	6	6	6	4
7.8	10.3333	4.5	8	8.66667	10.0094	7
6.2	6.85714	4	7.14286	6.5	5.5	8.75
15.5714	14.25	8.3125	4.25	15.7857	4	10.2143
5.6	6.79167	7.75	5	11.1667	4	6
6.14286	4.66667	21.6667	8.5	4	4.71429	5
8	7.85714	7	5.66667	6.45455	4.76	8.88889
7.2	5.57143	5.5	6.66667	5	4.25	9.28571
6.2	10	8.28571	5	7.83333	5	19.5
9.66667	24.7212	6.5	10.3333	7.66667	4	7.5
5	15.8125	4.5	6	7.71429	18.3636	7.75
19.5	78.2857	25.7143	7.45	8.33333	7	15.1667
23.2222	4.5	21.4348	8.28571	6.5	4	6.75
5	4	8.66667	7	17.8	8.19048	12.3
5.2	4	8.5	8.55474	9.66667	5.75	9
11.625	4	8.5	6.5	7.66667	5	5.5
8.25	9.75	5.16667	5.75	14.4118	5	6.25
5.5	6	7.5	7.94444	6.5	4	4.4
5.4	5.5	4	8.4	7	5.3	7.66667
8.33333	6	6.125	12	10.5	5.5	6.33333
10.3125	11.5	6.125	6	5.6	4.5	5
5.33333	8.5	7.66667	9.4	6.33333	5.9	11
6.25	18.7143	9	6.66667	6	5.11111	5.33333
6.66667	7.2	5	6.375	8.25	4	9.6
4.66667	11.2	5.14286	7.66667	7.33333	5.5	6.16667
5.66667	6	8.68182	14.4091	13.4	6.66667	5.5
7.46667	6	5	7.2	17.3333	8.09091	12.7
9.16667	7.57143	5.33333	5.2	6.5	4.66667	6
5.14286	12.4	5.4	7.66667	9.90909	5.25	14.1429
8.23529	5.25	8.5	6	6.1	9	7
4.5	6.5	9	5.03333	9	4.5	4.4
7.5	5	6.2	4	4	4.83333	10
9.33333	11.5385	7.4	5	6	4.5	17.75
8	10.7241	7	7.4	8.42857	4.5	4
4.66667	5	13.3014	4.66667	8	5	10.5
5.75	7.16667	7.375	4.5	4.5	5.33333	10
16.3333	6.16667	9.5	4	9.8	5.67647	4
6.5	5.25	7	4.57143	9.59259	4.5	9
4.5	7.625	6	4.5	7	8.66667	30.75
8.33333	8.3	7	4.25	8.14286	11.5882	6.66667
5.66667	4.2	5.27273	5	7	11	8
9.5	7.66667	10.2	5.5	4.66667	5	6
5	5	15.4	4.66667	10	5.5	25.5714
5	5	12.6102	5.07143	11	4	12.8571
5	8.13158	10.85	4	12	10.5196	6
8.5	4.5	7	5	4.66667	4.4	18.8
7.16667	10.2	6.4	7.5	8	5.85714	4.33333
7.66667	6.25	11.6	12.5	7.92308	10.5348	12.3333
5.2	4.83333	4	10.4858	9.25	5.22222	4.88889
5.5	5.75	6	4	9.8	4	4.25
8.5	4	5.57143	9	6.6	4.25	4.66667
4.5	5.33333	4.33333	4	5.8	6.26923	8.5
4.5	16.8904	12.8	6.5	7.5	5.8	4
4.5	6	7.5	7.66667	10	5.5	5
8	4	6	5	7.25	6.4	9.16667
4.5	5.5	16.1875	10	6.5	4	11.5
9.33333	11.5	21.8571	9	6.66667	4.75	8
9.6	5	6	6.125	5.66667	4	8.66667
5.5	6.55556	8.33333	4.83333	10.2857	5.33333	5
7	6.33333	10.25	8	5.5	4.5	8.75
6.75	5.66667	14.2857	11.8	7	5.07692	8.16667
5	18.8	5.5	8.25	10.5	5.875	6
5	7.85714	8.66667	4	7.75	25.3333	5.71429
6.66667	5.875	6.33333	4.5	8	7.29545	5
8.16667	4.5	4.33333	4.5	6	5.75	10.7143
12.8	5.71429	6	7.45455	8.25	8	5.5
7.5	8.71429	14.5	5.66667	9.16667	7.64	6.33333
4.5	7.6	14.875	5	9	5.33333	5.33333
9.8	23.6259	6.66667	7.5	8	5.5	24.5
7.5	8.625	8.66667	4.5	10.75	5.75	6.5
4	11.25	9.11111	5.5	4	8	19.3333
9.33333	6	4.33333	4.66667	4.75	8.17647	5.16667
4	8.09091	4	5.66667	4	6.46154	8
7.45455	12.5	4.6	9.5	6	11.0147	18.75
6.5	8.75	4.5	9.3985	16.5	4.5	9.36364
5.5	4	6.25	4.6	5.16667	4.5	10
17.6842	4.5	4.66667	5	6.66667	5.75	7.125
5.33333	6	12	4.5	11.8	6.47059	7
5	6	4.5	5.5	9	5.5	7.8
4.66667	4.33333	6	5.33333	8.5	5.5	7.11111
8.8	6	8	5.66667	5	4.75	6.33333
6.33333	5.5	15.8	10.6875	4.33333	6.03846	7.57143
8.5	9.66667	8	9.88032	4	5.5	7.66667
6	13.5	9.05556	6.3913	5.66667	4	10
6.71429	8.33333	5	5.33333	7.33333	6	15.375
6.33333	6	7.5	7.75	7.33333	15.7755	5.33333
6.25	5	5.8	4	4.5	8.38461	4
5.5	7.66667	6	4	4	8.88095	6
6	8.5	16.7778	4	7	5.66667	11.25
9	4.66667	6.66667	6.91667	11	5.66667	7.25
5.6	5	19.2222	7	4.33333	5.69231	7.66667
8	6.7	4.5	9.75	12.25	5.55172	23
9.28571	5.75	11.3571	4.5	6.66667	5.5	5.33333
10	4	5.85714	5	9.09091	4.5	4
11	4.5	10.5	7	5.33333	20.8	5.8
6.11111	12	6.75	6	5.6	5.3	6.5
7.14286	4	4.75	18.5	7	4.33333	9.66667
8.66667	5.42857	5	6.30769	5.5	5.2	5.66667
5	7.5	6.25	4	8.85714	4.25	7.66667
6	12.825	4.33333	6	4.6	7.35	4.33333
9.6	5.5	19	6.66667	6.5	5.25	4
8	4	9.55556	7.5	6.5	6.66667	5.75
6.15385	16.75	6.33333	5.66667	4.66667	4.5	9.8
4.5	13.0769	7.5	7.66667	7.55556	6.81818	33.6667
8	17.5714	4.5	7.8	11.6	5.57143	15.8
10	5	7	5.5	4.66667	6	5.16667
13	5.25	13.75	6.66667	9.25	7	13.25
4.33333	7.4	5.5	8	4	9.08333	11.3333
7.33333	10.5	8.88889	6.46667	5	4	8.25
5.375	31.5128	7.25	6	6.8	7.55224	5
7.875	6	5.5	7.89796	6	8.5	5.77778
4	7.25	14.5	9.01587	6.66667	5.33333	5.5
4.66667	4	6.5	6	8.5	8.65217	9.4
5.25	5.1	6.5	4.5	7.75	7	4.33333
6.69231	4.5	6.25	5.5	4	10.2727	8.66667
6.75	13.3333	9.85714	6	4.6	5.66667	6
7.7	5.83333	9.375	12.1667	7.8	5	11.2308
7.5	14.2292	23.6346	7	9.75	8.14286	9.88889
5.33333	10	4.8	4.5	4	10.5	7.57143
8.3	8	12.125	4.33333	7.25	9.33333	7
5.33333	9.28571	5.6	7.72727	7.5	7.34921	7
15.3333	13	11.6	6.6	5.33333	4.875	8.375
11.6667	5.75	14.75	9.28571	4.5	7.25	5
7	6.5	20.5	5.5	6.71429	7.66667	5.75
7.84615	4	7.75	4.5	7.8	8.33333	8.4
9.33333	6	5.6	6	9.25	4.2	15.7273
7	5	6.25	4.25	5.42857	6.33333	8
7.33333	13	8.46154	6.33333	5.8	8.25	8.16667
5.88889	4.66667	8	8	7.75	4.5	20.5
8.83333	6	13.4	5	7.66667	5	4.5
8.5	9.75	8	5.5	8.5	8.17207	5.5
6.5	8	8.25	6	4.5	4.5	7.33333
7	7.75	4.5	10.25	8.33333	7.25	8.5
6.88889	7	8	5.5	6.75	4.5	9.75
8.33333	6.75	4	5.33333	7.5	12	6
4.33333	12	9.2	4.66667	7.66667	4	7.25
5	4.5	17.6	7.74074	7	6	6.5
7.16667	5.33333	11	6.2	9.8	8.2	6.5
6.57143	8.33333	8.25	4.66667	11.5	7	6
6.33333	8.5	5.5	5	11.25	6.75	5.4
18.5	9	9.75	6.07692	4.66667	17.5856	42.5
9.75	14.96	5	5.19048	6.25	6.13333	10.3333
8.33333	4	10.3333	5	5.55556	6.33333	9.44444
5	6	10.75	4.5	6.85714	4.33333	9.5
7	4	8.25	4.25	6	6.61905	6
10	7	9.1	6	5.5	4	6.0625
5.75	7.2	9	6.33333	4.33333	6	6.33333
6.75	7.20455	5.5	7.25	5	5	6.25
5.16667	7.5	5	5	4.5	4.33333	5.66667
5.5	9	9.2	9.0625	6.25	5.42857	6.375
7.25	5.5	9.42857	4.33333	9.5	6	7.33333
6.625	4.5	5	6.25	5	6	4
6	6.33333	13	8.76471	4.83333	10.1897	5
5	5	22.8	6.66667	8	8.63235	6.25
5	5	13.2857	4	11.3333	6	8.8
6.5	6.33333	6	5	7.25	8.8	4.5
5	4.6	11.5714	4	5.5	5	5
10.0952	5	6	5.16667	7.5	5	7.2
6.33333	11.6667	9.5	7	18.7333	6	7.33333
17.75	7.58333	10	16.3	5.83333	5.89881	6
5	6.71429	12.5	15.6159	9.16667	4	7.28571
11	5.5	10.4	4	7.5	4	8.53846
7	5	9.88889	5.5	6.33333	5.36364	5.5
5	10	7.22222	5	7.25	4	9.66667
4	4.5	5.75	5.16667	12.3696	4	5.5
6.5	7.53333	6	4.5	4	5	5.66667
8.28571	8	11.75	8.89286	11.25	5.2	5.75
7.5	7.33333	5	6.53333	23.2857	5.65979	8.6
6.66667	6.5	7.33333	5	10.5	5.4	14.6667
14.1429	7	13	7.21951	10	11	5
6.8	7	5.75	8.575	5.75	7.44444	7.46154
11.5	27.5461	4.25	5.16667	8.5	6	12
24.25	7.42857	6.5	9.2	14.3636	4.5	8.33333
10	15	14.375	10.7931	14	5.75	6.3125
8.66667	5.5	6	4.5	8.125	4	18
12.8571	4	11.7273	4.5	12.6667	5.33333	7
4.75	6.4	9.5	5.83333	5	4	9.96154
6	7	18.6	4.5	4.66667	4.25	12.6
4	5.5	9.5	9.05085	19.8571	5	6.66667
10.4	18	4.5	6.68571	12.8065	4	5.25
9	7.66667	7	6.125	15.2	4.8	12.75
11	6.25	12.75	5.83333	7.66667	5.5	4.4
8.16667	4	22	6.84615	6.83333	4	11
4	5.5	6.33333	6.71429	10.6364	5.25	8.66667
6.33333	9.5	4.5	6.76923	4.75	6	4.8
5.5	7.25	6.5	8.8	12.75	8.14286	6
4.75	9.66667	11.25	6.07143	8.66667	9	5.33333
8.16667	36.8571	8.4	5	13.5	11	8.71429
5	4	13.4167	5.5	7.57143	8	8.66667
7	5.5	7.85714	5	13.8636	4.5	4.83333
5	7.375	9	4.53333	7.5	5	5.75
10	4	7	6.63158	7.4	6.75	4.5
5	5.25	4	4.5	11	6	7.5
8.88889	4	6.8	7.6	7.25	9.5	22.625
10	5	4.5	4.5	5.5	5.5	7.6
9.5	4	11.125	7	6	8.5	7.16667
7.33333	7	8.03704	7	8.33333	23.375	5.55556
5	4.5	10.6667	5.85714	15.4444	16	5.66667
7.14286	34.8571	7.33333	5.29167	5.5	5.5	7.5
6.66667	5.5	5	5.66667	6.6	19	5
8.75	17.0827	4	5	7.66667	33	6.5
10.6667	8.42105	7.33333	7.6	14.3333	4.75	7
7.4	8.2	8.83333	7.75	11.8462	5	10.6154
8.5	5	20.2308	6.75	16	6	11.6667
9	8	7.25	5	7	11.4	8.16667
5.66667	4.5	10.7368	8.4375	5	5	9.52239
6.75	4.33333	9	6.86667	11.5	24.5	5.83333
13.25	5.5	9.66667	4.5	5.6	8	5.69231
4	4	8.22449	5.88889	5.66667	5	7.72727
7.6	5	11.6	5.33333	7.5	6.33333	5
5.5	4	5.7	8	14.2	4.66667	4
18	7.2	5.66667	5.5	9	17.2857	9.16667
5.5	5.66667	6.5	5.33333	20.4444	5.5	13.8125
8.2	6.5	10.2857	5.8	6.5	7.33333	12.7778
5.5	4.5	5	6	11	7.33333	19.7647
7.5	9	17.5	4.4	5	334*	9.66667
5	5	6.33333	10.3	11.5	5.66667	5.81818
7	4.5	11.1111	7.56471	5.6	6.66667	7
9.8	5.2	7.5	5.77778	12.25	6	9.16667
5.63636	5	13.5	6.45455	6.16667	264,661285*	12
9.18182	5	11.6667	5.30769	9.25	9.65625	5.42857
5.4	6.5	9.33333	4	8.66667	7.33333	6.28571
5	8.47368	6	5.33333	6.33333	5.5	9.28571
5	4.5	5	6.14286	6.5	7.5	5.25
7	4.5	6.2	7.81429	5.66667	4	4.5
5.66667	4	8.75	7	14.4	24.7143	12
5.33333	8.33333	7.66667	7.58974	7	9.75	8.625
5.25	7	16.0161	8.28571	15	13.75	11.6
8	12.9359	7.05263	5	20.125	5.33333	5
10.4	4.33333	6.42857	6.5	7	16	6.33333
4.5	8.4	5	5.33333	6	9.25	7.4
4	4.25	10.1429	5	8.5	6	4.5
11.5	4.75	11.6667	6.56522	8	5.7	6.77778
5.33333	7	5.16667	4	10.5	7.80992	7.27778
5	6	8.4	4	8	6	6.85714
9.06667	6.5	11.625	4.66667	11.5	14	10.8182
8.24	4	14.6	4.5	5	6	5
5	4	11.5	4.25	8	4.8	14.6667
7.5	21.1071	20	11	9.8	10.0021	6.33333
10.25	9.5	11.7143	5.25	4.5	5.5	6
7	6.5	7.5	5.33333	4.5	11.3125	7.6
7.90909	5.5	6.66667	5.33333	4.25	7.6	7.4
4.75	4	4	4.5	12	7.05556	11
6.33333	4	24	5.33333	9.25	4.66667	4.25
6.66667	5	12	8.71429	25.0833	8.67871	9.61539
9	5	7	4.66667	26.3333	5	5.57143
4.5	5.5	11.25	6.4375	6.25	10.7463	8.95652
13.1111	4	5.33333	4.11111	30.25	4.8	8.08333
7.33333	7.75	7	8	5.5	6	4
11.5	8	6	8.2	10.4286	5	7.66667
8.81818	4.33333	8.5	6.69565	33.6	8.41667	4.75
6	9.66667	9.91667	5.81818	5.5	10	5
8.33333	5.5	10	4	6	9.4	14.8571
4.5	7.4	5	5.4	6.42857	5.5	5
6.5	5.5	8.25	7.36842	8.25	7	6
7.91667	5	12.5	13.6667	22.5	5.76923	7.66667
8	6.5	5.66667	6.78431	5.33333	5.33333	5.5
7.85714	9.8	5.5	4.5	5	5.4	10.7619
7.2	7.66667	8.75	7	11.2	7.58621	5.5
5	6	6	4.5	5	5.66667	4.5
8	13.75	22.5	6.8	13.3333	5	11.6667
11	6.5	6	7.5	13.7273	4.66667	8.66667
6	9.66667	5.5	7.5	6	5.9	9
11.6	5.6	5	4	14.3846	7.16667	5
10.8333	11	5.5	5.75	4	4.5	5.5
9.6	4.25	7	5.66667	5.8	7.66667	15
7	5.625	34.04	8.66667	7	5	4.5
4	6	7.5	6.6	6	6.8	8.33333
8.75	4	7	4.5	9.66667	5	11.6667
6.81818	4.25	4.83333	5.83333	13.7143	10.5	7.45714
5.25	6.15385	16.3333	7.37736	16.8571	7	4.75
6.8	4.5	11.6667	6.4	9.375	4.83333	6.5
6	7	30.8125	6.5	5	4.33333	7.2
9	5	5.66667	5	11.5714	6.69231	9
6.5	8.5	4.6	8.875	9.1	8.65823	8.6
5.5	5	5	7.53846	13.5	4.33333	4.5
4.5	4.5	8	4.5	6	9.45	6
5	4.83333	7	5	7.33333	13.3333	4
8.2	5.45455	5.5	5.26087	12.375	7	5.33333
10.6667	4.5	8	5	16.8333	9.83333	4.85714
9.5	6.83333	8.33333	8.4	6.5	5.5	9
4	6.5	4	9.25974	7.25	8.33333	6.2
11.25	6	6	8.57143	8	9.66667	9
9.16667	5.33333	11	6.88235	4.5	8.16667	9
4.5	7.61538	12.8235	4.75	9.75	7.8	4.66667
6.6	5.8	5.25	5	9.33333	4.5	9.8
11.2222	4.5	6	6	8.55556	5.81818	9.2
5.33333	13.5	5.33333	6.80556	13.5652	4.66667	5.2
4.75	6.33333	6.66667	4.33333	5	5.5	8.42857
5	5	7.28571	4.5	5	10.3333	5
6	6.5	5.66667	4.33333	9.16667	5.5	7.4
6.57143	4.5	6	4	7.5	4	8
4	5	5.57143	6.8	15.2857	53.8519	4.5
10.8	6	7.66667	7.22222	6.8	12.2353	4
10.25	7	4	7.33333	15.5	7.74194	4.5
11.4286	5.5	7.25	5	6	9.07692	5.85714
6.75	6.7	12.4286	4.5	5	6.33333	6.2
14.1	4.5	4	5.8	10	7.14286	7
11.6	4.5	13.619	7	6	6	4.33333
8.05405	5.375	10.5256	7	8.25	9.14286	5.33333
6.66667	12.0471	12.6	7.5	9.25	11.3333	5.8
10.2222	4.5	5	5.5	5.875	4	16.0435
9.5	6	7.9375	6	10.9091	6.66667	8.5
10.2	4.5	5.33333	4	11.2391	4.5	5.66667
5.5	5.5	7.66667	4.33333	9.27273	5.33333	12.5833
7.5	4.8	8.75	4	21.5625	7.66667	9.86207
6	7.90678	7	4.75	8.30769	10.2459	23.6364
5.91667	5.25	7.33333	5.2	5.83333	5	7.2
9.33333	5.66667	5.6	5.8	6.85	8.71429	5.75
16	4.25	6.84615	4.5	13.875	6.8	12.9286
5	4.85714	8.42857	6.25	5.5	9	11.5833
8.57143	5.5	11.4545	14	7.66667	7.14286	14.2308
7.66667	5.16667	8.66667	7.66667	14.3333	11.2593	13.8846
6.5	4.83333	7	5	13.4444	14	11.5
4	5.5	7	8.33333	10.25	8.22222	7.4
5	5.66667	4.5	4	8	5	7.33333
5.75	5	6.66667	6	6	10.2857	8.22222
6	4	8.14286	10.5	18.8333	5	6.5
4.5	6.5	6.3	4.5	5	6	8.2
6.5	6	5	6.66667	10.0588	6	6.75
5.8	4.66667	6	37.3333	6.4	6	9.625
6	4	6.5	9.5	8.46154	8.66667	6.83333
8.66667	5	6	6.85714	7.08333	6.5	5
6	6.68	10.2857	5.95652	28	4.66667	8.44444
6	4.33333	5	6	4	7.5	13.8333
8.71429	4.33333	20.7143	7.5	6	17.7242	11.25
6.6	5.66667	7.2	8	4.5	8.9	16.1667
6.46154	5.6	11.6	8.5	22.6667	8.8	4.66667
7.66667	5.33333	7	5	30.5714	6.33333	6.66667
5	4.66667	7.33333	9.36842	9.25	6.85714	5.33333
9	5	6	4.5	6.5	4.85714	4
9	5.8	6	6	4	7.25	5.5
5.5	4.66667	11.6154	10.1429	13.6667	5.5	14.9333
6	4.8	5.2	5	5.8	6	11.4
6.33333	4	4	4.66667	12.75	4	6.25
4	4.8	8	5.6	13.2	5.71429	12
7.5	8.1	6	9.69231	13.6667	6.5	13
11.75	5.66667	5.5	7.92857	10.3333	8.5	6
7.77778	4.66667	9.77778	8.83333	5.5	5.84615	8.25
5	10.6667	4.8	7.5	15.6	5.5	11.5385
6	4.2	8.71429	4.76923	6.55556	11.3137	13.4516
6	4.66667	5.5	4	8	4	7.33333
7.6	4.5	6	4	10.2143	5	9
8.33333	6	6.71429	4.5	7	5.3913	39.75
6.5	4.66667	4	10.2043	11.2857	5	6.04762
6.8	5	9.88889	4.5	14.6	12.8571	4
5.88235	10.2295	8.4	21.4353	5.42857	6	13.6944
9.25	10.7	7.2	4	8	10.9334	8
7.66667	6	4	4	6.33333	4.75	24.25
7.25	4	8.4	4	4.75	4	10.4167
4	5.36364	4	4.75	8.81818	8.13043	8
11.4286	4.5	14.5	5	8	7	5.2
5.5	4.66667	4.5	7.94886	5	5.27273	6.66667
4.8	5	4.33333	10.3453	6.5	5.5	11.375
4.5	10.1389	6	4.875	11.5	6	7.57143
12.6667	5.75	10	6	7.5	7.33333	37
9	4.5	4.33333	5	37	8	14.4615
13	4	7.33333	6.28571	21.6667	5.2	8.44444
10.3333	4.875	4.5	5	11	6	5.5
5.25	4.66667	9.5	4.5	21.0667	10.2222	12
5.33333	6.09091	10	4.5	16.9722	9.3	6
9.4	4	6	5	6	5.5	9.71429
6.125	6	9.33333	5	6.33333	5.5	12.75
8	4	6.33333	5	6	6.33333	6
14.25	4.33333	5	4	7.66667	4	9.4
9.2	4.25	9	4	13.5833	5.25	8.30435
15.1	5.4	10	4.25	6.5	5	8.63636
6.5	8	9.66667	5.125	6.25	5	5.33333
13.25	24.2667	7.5	4.5	6.33333	7	8.25
6	4.54545	6.25	7.66327	15	4	9.4
7	5	7.63636	4.78571	8.25	13.6667	18.7692
5.66667	4.5	4.33333	5.33333	5.33333	5.5	9
5.5	5	6.66667	6	12.5714	5.5	8
4.5	5	20.3077	5	11	4.6	4
10.75	6.2069	5.66667	4.5	17.2	6.5	24
9.33333	4.5	8.5	4	10.4286	6	15
5.66667	5.9697	9.8	4.5	9.6	4	12.6
4.4	4.2	4.5	5	7.77778	5.8	4
6.5	5.33333	6.72222	4.57143	4.25	5.16667	7.91304
4	6	7.33333	6	6.6	4.33333	5
12.25	5	9	5	4.33333	5.2	8.5
7.5	4.5	5.66667	6.64583	6	9.4	8.125
4.75	5.5	6	4.75	14.4286	4.16667	6.5
5.85714	4.75	8	4.25	4.4	6.7561	6.5
7	4	7	4.5	13.5	4.5	11.8278
6.66667	4.33333	6	4.5	7.33333	5	23.5909
8	5.2	7.28571	4.5	17.5	10.1566	5.66667
6	4.33333	4.5	4.88889	12.6	14	5.85714
6.42857	5.95652	11.2	7.4268	11	6	16
5.5	7.28571	6.4	6	6.25	4	8.11111
10.5	6.23077	5.5	4.5	6.25	9.6	6
8.75	8.66667	9.16667	4.5	10	12.9	15.2727
4	4	7.75	5	10	4.5	6
5.33333	6.2	9.5	7.09524	13.75	9.17333	4.75
6.6	4.78571	14.75	5.83333	11.3571	4.66667	18.2
4.5	6.15789	6	4.84615	15.8571	6	12.75
5	4.5	5.66667	7.09412	9.2	5	14.2857
4.33333	18.6966	6.5	4.66667	5.75	6.66667	6
10	4.66667	5.25	5.75	8.66667	4.66667	7.14286
7.5	4.66667	4.5	4	7	8.33333	8.5
5	4.66667	5.5	4.8	6.75	10	6.5
9.2	5.71429	7.5	4.5	5	4.5	12.9
12.8	7.8	5.5	4.75	21.6	6.30769	10.3333
6	5	5.33333	6.29368	11.6667	5.42857	8.2
15.5	5	20.25	4.8	4	8.36667	18.7143
12.25	4	10.9474	4	10.3333	13.2857	8
5.33333	4.33333	4	4.66667	9.66667	16	5.5
6	5	5	4	14.6667	4.2	4.66667
15.875	4.33333	6	4.33333	6	11.5	15.9167
9.25	5.5	6.33333	5	10	6	11
5.8	5	15.3333	4.5	4.5	6	5
7	5.5	6.16667	4	13.25	9	10.3333
7.5	4.5	5.5	4.88889	9	7.5	6.33333
10	7.5	7.6	6.1875	8.16667	7.33333	11.8
4.33333	17.8153	13.6667	6	10	5.875	12.4286
15	6.10526	10.6	4	7	4	13.1471
6	6	6.28571	5	13.3333	6.28571	7
6.8	4.63636	6	6.5	8	5	5.4
6.66667	4	5.4	5.63636	12.1111	9.54762	10.1538
7	8	6.5	4.33333	7.5	5	4
9.1	5	10	9.33529	10.5	10	6.18182
5	5.36364	5.71429	4.66667	10.0667	6.53571	5
8.5	8.375	6	4	9.5	4	12.8
7	7.57143	13.2	4.5	8.14286	7.13333	8.65217
9.66667	5	6.8	4.66667	8.33333	4.33333	11
12	6	7	4.33333	4.33333	7.33333	11.1667
8.2	5.6	6.5	6	9.16667	4.33333	8
10	5	10.0857	6	14.25	6.5	9.53333
6	4.5	8.14286	4.75	13.1667	11.125	5
17.6667	4	8	6.5	10.4	8.92857	7
4.66667	5.25	4	4	8.66667	8.25	7.33333
8	8	6	6.11538	19	4.33333	10
7.5	8.27778	16	5.375	4.66667	6.57692	6.5
6.5	6.4	5.75	6.2	16.5	7.25	18.4583
5.33333	33.2646	4.5	4.5	8	7	6
6.5	10.1667	24	4	9	5	7.75
12.5	7.25	14.2857	5.76471	10	5.5	4.66667
7.5	7.16667	9.25	4	7.4	10.7931	6.66667
20	6.55556	5.83333	5.64286	9	5.8	10
7	5	10	4	7.33333	6.8	5.5
6	10.4	7.83333	5	18.3333	11	6.44444
5	14.1339	5.6	7	8	6.27273	5.33333
5	6.5	5.5	5.61538	8.5	4	5.75
10	9	6.33333	5	14.4	6.33333	7.33333
18.3333	10.9444	4.5	4.85714	8.5	7	12.3
10	18.5	14.5	4.88889	7.25	5.5	5.33333
5	6.75	9.8	8.5	9	4.5	11.36
11.8333	10.3333	9	4.33333	22	5.66667	10
7.66667	6.66667	11.6667	4.5	6.66667	6.25	4.33333
14.6667	8.46	5.75	5	8.66667	7	7.5
18.3333	5	13	5	6.33333	5.66667	12.5714
5	6.75	5	5	10.5	6	22.9412
10	4	10.8	7	13.9429	4	8
6.25	7.25	5.55556	4	10.25	5.41176	14.9333
11.3333	8.1	11.6	7.90244	5.5	7.2	12.625
4	9.24324	10	5.52941	23.6667	7.57143	5.33333
9.66667	4.33333	6.33333	4.5	9.14286	8.66667	7.6
10	7	7	7.65789	6.2	6.5	13.2564
10.7	5.5	10.5	5	16.75	5	18
6.8	7.71429	7.75	5.35	5.5	8	11
13.4286	5	7.71429	5	14.75	4.75	7.33333
13.4	4	9	5	5	10	11.5854
5.25	4.5	8.14286	4	23.5	5.66667	7
5.4	7.98485	13.8333	5.5	4.66667	8	10.4545
8.13333	5.6	8	6.625	9.75	7.4	12.5
6.66667	13	4	5.75	24.75	7.25	4.8
10	10.5	9.2	4.5	7	7	8.2
16.1429	9.5	6.83333	5.66667	11.3333	4.25	6.07143
7.5	7.86667	8.5	4.5	9.14286	6.25	8
6	9.5	5.5	5.33333	8	10.3	8.28571
11.8333	9	7.11111	5.81818	5.5	6	10.4
5	8	7.71429	4	24.25	4	8.78571
10.75	12.1667	16.375	6.64198	12.25	6.5	9.25
6.66667	14.2632	7	6	4.5	5	5.66667
29.7	5	5	4.66667	38.9091	6.66667	12.4
6	4.83333	6.33333	5	21.4167	5.5	6.2
4.5	13	11.5455	4	20.6	6.4	5.5
5.8	9	8.2	5.5	14	8.96296	4.33333
6.66667	7.33333	7.5	4	6.25	5.66667	9.83333
2995,83325*	5.66667	5.66667	5.5	5	5.75	6
5	35.6154	12.8	7.8	17.7143	13	7.61111
6	6.42857	9	10	6.6	10	15
5	13.3333	5.25	4	9	4.8	6
10	7.16667	10.25	4.2	5.33333	8.5	7.3
10	8.80769		4.85714	7.25	6.5	11.1667
4.5	28		6.21739	10	6.33333	11.7368
4.5	4.33333		7.67089	4.5	14.2	10.5
5.5	17.3715		5.5	10.3333	7.33333	6.75
4	10		6	17.8	11.7143	7.58333
7.5	13.2941		6.33333	13	7.42857	5
26.4	7.4		4.5	9	7.3	20.6667
7.5	11.375		5.16667	8	4.66667	6.57143
10	4.5		4.33333	5	7.5	7.16667
5	10		6.16667	5.66667	7.4375	9.2
7.25	32.0882		5.5	7	4.5	10.25
8.75	6.14286		5.85714	8.28571	7.48	13
4	6.5		5.25	9.66667	7.4	14.1429
6.16667	5.125		6.75	7	13.5833	10.7143
16.1667	16.8537		4	8.75	6.5	5
21.5	5.33333		4	8.4	5.33333	12
10	10.3333		5	9.5	7.5	6.5
14.3333	30.3636		4	5.6	4.66667	5.4
5.33333	11.8182		9	11	6.4	5.5
5.5	5.86364		6.66667	9.8	8.5	9
7	15.8889		6	10.8	4	5
10.3333	4.5		5.5	22.25	5.16667	10.5
5.5	5		7.42857	13.6667	5.75	5.5
7	19		7	6	5.22222	4.66667
8	7.57143		6	7	9.66667	12.4286
24.1765	19.5		4	8	9	9.66667
5.81818	75.9		4.75	7.8125	8.95652	7.85714
10.25	6		6	10.2308	5.33333	5
14.75	5		5.5	24.25	7.57143	5.25
10.5	21.5953		5	8.66667	6.8	13.25
12.8	7		7	14	4.25	9.63636
5.4	6.5		5.33333	10.75	7.51282	5.33333
6	30.6667		4.63636	6.5	7	9.72727
4.66667	7.55556		5	4.5	6	5.4
7.42857	8.75		5.11111	12.8	6	6.6
9.66667	24.9231		4.5	5.875	11.6667	13
4.33333	8.5		8.53488	6.66667	6	8.9
5.5	9.6		5.62963	5	10.7273	9.22222
12.2857	6.16667		6	9.92857	22.2	16.4444
5	4.75		6.80952	7.75	5.66667	10.1667
22.3	11		5	13	8.25	8.25
6	4.33333		4.5	7.66667	5	4
9.2	4.66667		4	5.66667	7	5.71429
4	25.7692		7.20455	7.8	8.27273	4
10.4444	7.6		5	8.5	5	4.5
7.5	7		5.33333	26	5.2	31.6
7.33333	4.33333		4	5.33333	9	8.28571
13.25	6.5		4.5	8	6.66667	5
6.3	10.6		4.66667	6.66667	6.5	6.6
6.5	8		6.14286	17.8	4.5	8
5.18182	13.7143		6.84615	11	4	6
5.5	8.76923		4.5	5	7	7.25
20.6	8.6		5.4	4.33333	10	5.71429
9.5	5		6	9	7.33333	11.5
5.5	44.2677		6.23179	6.5	12	6.66667
5	6.47368		5.5	7.66667	11.6667	13.5714
5	6.125		4	17.7458	5	6
8.66667	33.4161		5.33333	6	7.5	4.33333
9.2	9.5		4.5	5	7.66667	20.8
5.5	4		5.18182	7.42857	4.5	7.25
6.33333	7.66667		7.875	5.77778	4	8
8.33333	6.25		5.83333	7.3	4	5
11.375	11.5		4.33333	16.5	4.8	6.77778
8.25	8.875		7.25	7.5	4	14.1429
4.5	6.5		4.5	11.5	17.0714	11.3333
5	6.33333		8.25	7.27273	7	8.91667
5	6.16667		4.33333	5.5	11	8.5
9	5.5		5	6.5	7.54545	5.5
12	7		6	8.83333	5	6.33333
9.33333	4.5		5.2	7	4	4.42857
12.25	6.5		4.5	5.5	9	10
8.66667	5.5		4.33333	7.5	12.0741	10
5.75	11.1111		4.66667	4.5	12.7143	7
33.3333	12.6		4.2	4	4	9.21053
4	7.33333		4.5	20.4286	13.4167	7.5
4.66667	8.6		4.33333	7.33333	12.5	6.91667
8	10.3333		5.5	8.75	5.5	7
4.75	7.8		5.5	4	6.2	5
4.5	5.75		4.5	8.66667	4.5	6.33333
8.75	9.25		4.25	8.75	5.5	4
9	5.75		5.33333	6.75	6.5	6.5
7.5	8.33333		6.42424	14.5	8.97727	12.3333
4.4	14.8		6.11111	5.5	4	5.6
18	8.75		4.75	11.1429	4.5	8.33333
4.5	11.3		9.9	5.4	11.6	8.33333
5	4.33333		4.5	10	6	6.57143
9	4.5		4.5	6	6	11.25
6.33333	6.2		5.5	14.75	8.16667	4.33333
8.75	8.5		5.66667	11.3333	8	6
7.33333	12.75		4.25	12.1667	6	6.33333
4	5		4	14	5.75	6
11	5		5.4	18.125	7.25	16.2
10.5	18.4118		5	9	4.66667	4
5	5		6.71429	10.6667	4.66667	10
11	16.75		4.33333	19.4545	4.33333	6.66667
5	11		4	5	11.4595	5
6.42857	18		5.5	8.375	4.33333	6.90909
6.66667	11		4.6	6.33333	6	7.5
6	10.6		4.25	4.75	7.33333	4.66667
14.6	6		6.33333	14.3333	8.06667	4.6
8	6.4		5.33333	4.5	6.5	6.5
4.5	7.66667		5	14.3333	9.08333	6.75
25.3333	8.2		4.66667	5.66667	7.4	6.6
5.66667	14		5.86207	10.6667	6.33333	4.66667
5.5	10.4		6.26984	6	6.5	7.66667
4.4	6		4	10.3333	7.4717	6.85714
11.375	8.75		4.33333	11.3571	5.5	5.5
7.875	8.16667		8.50993	16	10.9286	8.42857
6.66667	4.75		6.0625	7.29412	5.5	5.5
6.14286	5		5.34615	5.16667	4.83333	4.5
4.75	5		5.6	8.17647	5.4	7.8
9.6	12		4	4	8.0625	4.75
8.25	8		5.5	9.5	8.5	5.66667
7	4.8		6.33333	7.75	4.33333	4.4
13.3333	16.4		5.33333	5.14286	7.5	6.25
8.33333	7		4.33333	11.4828	5	10.3
10.5	11.5		8.33333	16.5	5.2	7
5	5		5.4	12.625	5.57143	6
8	6.66667		6.14286	10.3333	4.66667	22.25
7.4	6.83333		4	8.57143	7.66667	4
10	25.8333		4	7.5	4.85714	4.5
6	7		5	8.5	5.4	4
5	12.5		4	8.85714	4	6
5.5	5		4.5	7.33333	7.5	10.25
5.75	10		5	6	7.57143	7
9	5.75		5	6.5	10.1111	7.75
5.5	11.8333		12.3333	6.5	7.58824	4.5
5.5	4.33333		10.0833	20.2	13.5	8.5
5	12.3333		7.66667	7	4.8	6.5
10.8	17.4286		19.5	8.14286	5.5	5.75
9	10		11.5	6.8	4	5.4
9.75	8.69231		13	10.1667	5	6.5
8.75	7.625		10.8462	5	5.57143	5
9	7		6.8	19.125	8.33333	6
13	6.88889		9	9.25	10.2727	5
10.88	6.75		7.5	12	7.77778	9
7	6.2		4.8	14.5	5.5	4.33333
15.5	6.66667		13.2857	10.3333	6.61111	9
6	14.5185		4	16	7.5	6.5
7.57143	5.4		10.9275	5.66667	13.3333	8
5.33333	9.75		8.16667	9.72222	17.5405	5.66667
5.75	4.5		11.25	9	5	4.5
18	7.75		4	6.5	9.77778	7
5	8.5		7.7	4.5	5.6	5.33333
12.875	7.30769		6.6	14.5556	4.6	4.5
7.94444	7.5		4.75	4.5	4.5	7.33333
5	10		36.5	7	4.5	7.33333
4	5		14.7273	9.8	8	6.8
28.8	5.33333		7.71429	5.5	8.41935	5
5.66667	4		12.4118	16.9375	7	5
8.66667	6		7.8	10	4.5	5
6.66667	15.2857		9.5	10.75	5.16667	8.6
5.66667	10.6923		8.3	25.5	7	21.6364
5.75	5		9.5	5.5	7.5	6.8
7.5	8.25		5.5	5.71429	5.75	7.33333
6.5	5.5		6.25	10.1667	9.5	6
9.25	10.75		24.1538	8.33333	6.3	9.33333
5.57143	8		6.5	8.33333	4.66667	5.33333
6.5	20.3		5.9	6	6	5.75
5	6.66667		6	13.5294	9	11.1818
6.5	7		6.33333	13.4706	12.5	4.5
4	12.625		10.25	9.28571	5.33333	12.5556
10	5.33333		10.5278	15	6.5	5
6.9	7.75		13.7692	9	5.4	9
9.33333	7.5		13.3333	4.5	5.5	5
6.33333	7.33333		9	9.28571	9	4.5
5.5	10.6667		11.6154	12	12.2407	6
5.25	10.2632		19.6667	20.8333	4.33333	4.5
5	8		9.5	21.6667	8	5.625
12.2857	38.3333		15	13.2	8.3	6.75
5	11		6.5	8.28571	4	7.5
8.66667	9		12.7143	8	6	4.5
5.5	15		9.66667	7.33333	4.33333	7.14286
7	5.66667		7.85714	7	5.6	4
4.66667	4		8.875	7.88889	5.5	5.33333
7	10.8182		7.8	8.33333	4.5	4
8.66667	11.25		15.4737	10.5	5.5	4.33333
5.5	12.4286		5.5	13.25	8.42857	5.5
4	10.8		6	14.25	8	4.5
7	6.11111		6.75	5.66667	6.66667	9.6
4.5	5		4	19.9524	5.5	7.66667
10.5	8.8		5.5	4.66667	7.5	5
4	4		6.9	13.25	7.84	8.71429
5.25	18.7727		4.5	9.66667	4.2	4
8.2	8.75		11.25	7.5	5	9.75
5.25	14.6471		5.75	5.66667	6.94118	6.15
6.25	20.7879		7	5	4	7
5.5	7.25		5	5.5	10.5	7.75
24.9412	16.75		5	13.6	4.5	4.4
5.16667	4.5		5	6.25	7	6.25
7.25	7		12	16	6	7
4.66667	14		22	8.66667	5	7.66667
6	5.66667		5.6	6.5	6.45455	4.33333
4.66667	7		8.30769	10.1429	4.66667	7.16667
6.75	6.6		8.5	8.25	5.33333	7
4.66667	24.2		8.85714	9.41177	5.57143	5.5
5.5	13		5.5	8.16667	10.5	6
10	9.5		14.2	4	4.5	6
7.33333	7.5		4.33333	8.5	8.72727	7.10526
9	15.4167		11.5	6.66667	4	6.44444
5.33333	12.75		5.3	13.4667	8.625	8
9.28571	4.5		6.77778	7	6.83019	5.5
7	9.5		7.66667	37.3636	8.11111	5.66667
4.5	5.5		18.0432	11.8462	8.20833	4.5
11.1667	6.5		8.5	11.6	4	9.33333
11.25	9		8.16667	5.72727	8.78571	4.5
35.5	6.5		5.5	8	5.25	6.5
8.75	7.33333		5	6	7.9	10
5	4.75		9.75	6.5	6.42857	5.83333
7	8.78571		9.16667	10.5	5	8.42857
12.6667	11.5		8.5	9	6.6	6.5
9.5	5.5		15	9	5.5	6.4
9.46154	8.19444		9.2	5.66667	7.5	7.2
7.25	11.8333		9.375	6	4.2	7.83333
7.83333	9.85714		10.3333	6.5	6	10.5
6	7.75		11.5714	4.5	7	4.25
6.14286	12.6667		8.25	6.66667	9.05882	10.9286
8.75	12.1429		9.4	6.33333	12.125	9.83333
5	12		7.2	5	5.5	5.66667
7.57143	9.25		13	4	8.51429	5.22222
13	20.9061		4.5	4	6.5	6.25
13	5		9.90909	4	10.7143	6.4
4	4		7.85714	4.5	4.66667	4.5
9	10.4444		4.5	7.5	12.5	7.5
5.8	8.89286		11.6667	4.5	6	7.4
15.2222	7.28571		6	9.33333	5	5.75
5	10		5.5	12.3333	6.54545	11
4.5	22.2252		12	9.25	8	5.28571
6.5	4.5		9.5	9.66667	7.5	6.25
7	8.5		5.28571	4.5	4	7.75
4.5	10.3333		13	10.5	4.66667	8
17.6667	7.2		4	5.66667		18.6316
14.2	8		9.73171	14.25		4
7.5	11.5		7.5	7.25		8.42857
5.66667	15.2333		6.90909	5.75		4
21.2857	7		4	5		7.25
6	14.4255		5.8	11.6667		9.33333
7.75	5.66667		19.3165	7.16667		5.5
16.0732	8.25		15.6387	4.5		6.66667
19.5625	19.3333		7.33333	5.25		7
6	31.9231		4	6.6		37
19.5556	6.5		7	16.4444		6.5
12.5	13.3636		10.3636	11.6984		8.4
6.6	6.5		9.66667	23.4231		12.0588
4.5	9.5		5	5		5
8.57143	8.5		5.33333	7		5.33333
7.5	17.8846		5	7.71429		11
14.6667	5.66667		4.8	8		10
10.7778	5.66667		5.5	7		6.66667
10.3409	12		12.75	6		4.66667
7.33333	13.1456		6.90909	10.5		8
16.8	6		4.66667	8		6.33333
7.5	5.5		5.8	14.75		5.5
10.4	5		4	6		12.4
5	13		7.5	5.5		7.5
8.75	4		5.33333	21		5.5
7	8.25		12.125	12.6364		8.5
9.375	6		4.5	5.4		5
6.5	5.8		5.33333	11.25		4
19.2	6.5		6.78261	8.57143		4.33333
10.7143	15.5		24.2992	13.5		5
12.2	8.33333		4.5	14		4.66667
14.1538	5		10.1667	8		5.6
15.3333	5		9.58333	7		6.5
6.4	9.3125		6.96429	5		5.66667
15.2	11.1538		4.8	7.4		6.5
17.6	6.5		17.125	6.5		4
14	8.33333		9.8	19.5		4
6	6.5		7.42857	16.3333		6
14.3333	7.25		4	8.5		4.5
7.5	6		4	5.85714		5.66667
6.44444	5		4.66667	12.5		7.25
6.33333	7.25		6.45455	13		7.33333
8.125	7		9.83333	9.75		5
13.6	17.8462		18.5783	6		5.5
6.66667	5		4.66667	4.66667		7.85714
7	7.66667		4.5	4		8.5
5	4.66667		5	9.66667		5.25
10.8571	7		4.33333	5.33333		5.75
4.25	7		7.5	15.5		8
8.16667	4.5		18.4286	6.75		8.25503
6	23		7	7.8		7
6	19.8667		4	14		4
11.1667	8.66667		4.6	8.66667		9.63636
8.16667	17.5		4	4.5		7.81818
5.5	7.66667		4.33333	9		10.5
4	9.33333		14.2	17.1667		6.6
6.44444	6.44444		7.5	7.5		4.5
5.5	17.8333		6.28571	24.5		5.33333
7.5	9.14286		6.5	5		7.66667
6.66667	5		4.5	7.75		8.75
6.5	9.14286		5.4	5		6.5
7.25	7.4		5.5	5.5		7.5
8.71429	4		76.5714	7.5		5.33333
5.75	9.14286		10.2353	20.8		11.6667
11.4	4.66667		12.6667	6		5.85714
6.90909	11.6429		4.5	17.75		4
8	9		5.5	26.3103		4.66667
7.5	6.66667		12.5	7		5
12.3077	8.66667		4.25	5.66667		8.75
9.8	8.33333		5.66667	12		7.77778
11.4286	7.5		11	7		4.6
8.5	6.75		18.9202	5.375		6.5
12.25	10.3385		4.8	10.5		5
5.5	5.66667		5.75	5		6.25
6.4	14.2759		5.33333	8		4.5
4.5	7.28571		6	9.16667		6.33333
8.4	5.5		18.0769	4.75		18.1667
16.0909	5.53333		6.77778	8.5		4
11.2	11.9		5	6.5		11.5
18.2308	34.5902		4.33333	12.5		4.5
4.2	4		5.5	17.5		7.5
31.4167	17.5714		20.1613	7.33333		4
10.2857	4.33333		4	6		5.33333
8.25	5.5		7.25	8.88889		8.2
6.66667	5		5.66667	7.33333		13.375
13	4.5		4	8.57143		7.8
5	7.5		4.33333	12.25		6
5.5	20.4228		4.33333	9.85714		9.16667
48.2308	5.6		7	19		32
10	8.17857		10.6667	5		8.8
4.33333	7.5		4.66667	16.4		8
8.125	6.83333		14.8333	5.5		7.5
6.33333	11.75		8.42857	8.2		4.6
6.2	5.5		6.66667	5.66667		5
7.66667	9.5		6	24.6364		9.81818
6	4.5		6.5625	9		8
4.33333	5.33333		13.7143	7.33333		8
8.8	10.875		8	4		7.5
4	118*		14	20.7143		7.5
12.7143	4.5		8.33333	11.25		7.66667
7.33333	5.5		6.42857	14.5		6.33333
12.6	5		5	4.66667		4.5
7.66667	9.33333		6	5		4.5
6.4	11.3333		7	5.66667		6
6	14.5		10	7.66667		8.83333
6	11.6753		9.7619	9.4		4.83333
13.037	7.25		6.58333	6.71429		5
10.75	12		4.66667	11.75		5
5.5	10.5		6	10.3696		5.5
4.33333	4.5		4	7		7.33333
8.66667	7.28571		7.25	7.33333		7
5.75	8		6.5	7.88889		5.6
5.66667	7.5		12.1	16.4		4.75
4	4.5		6.71429	4.5		10.5
5.33333	15.8704		8.5	7.4		6
8.14286	4		5.33333	12		5.83333
10.4	9		5	8.5		7
7.83333	4.66667		7.16667	19.75		10
10.8095	8.77778		16.5	5		9.33333
6.5	5.5		10.5	11.45		5.5
5.5	7.5		16.5221	7.66667		7.625
7.66667	13		7.63636	12.125		4
15.3846	15.25		5	9.5		7.66667
10.4667	8.91667		4	6.5		8
14.5	10.5		17.875	5.5		8.5
4.6	4.5		11.125	8.16667		4.5
7	7.48485		4.75	6		49.2222
5.5	9.85714		5	6.33333		6
6	6.5		6.2	7.16667		6.33333
9	8.73333		8.56522	5.5		7
12.8333	12.5		14	9		4.5
4.33333	5.8		9.06522	32.5		16.6667
5.75	6		12.5	6.5		4
4.5	6		5	12		7
4.66667	6.6		7.5	7		8.76923
5	7.33333		7.5	8.23077		17.875
6.25	9		12.0621	8		5
7.5	15.061		5.66667	15.4746		9.5
14	8.75		12.5714	8.6		5
12.3333	7.5		11	7.66667		4
5.42857	7.5		12.0714	5		5.5
8.2963	9.68421		4.9	9.8		7.75
8.2	12.5		4.33333	12		7.25
7.5	7		9.42857	4.66667		10
12.25	13.5		8	7		6.2
6.66667	7		9.07143	5		7
5	6.75		6.75	5		6.33333
10.5	7.83333		17.3077	6.5		6.8
4.75	6		5.75	5.25		6.75
11.0833	11.625		6.2	6.5		10.8
4.5	8.33333		9.68182	7		6.5
4.25	5.66667		5.66667	7.66667		18.8889
7.8	5		4.5	5.33333		5
4.66667	14.6		11.1667	8.33333		18.2105
9.125	26.9333		8.95455	6.75		10.25
5	12		6.22222	7.14286		5
4.5	7.33333		5.14286	9.2		6.66667
6	8		4.25	9		5
7	8.66667		6	5.16667		7.33333
4	5.6		9.375	9.44444		5.4
5.22727	20.3913		8.70588	14.56		7.75
9.16667	7.5		9	13.3333		4.5
6	6.71429		4.66667	20		8
6.6875	10.3333		11.6	8		5.5
6.5	7.84615		5.2	12.5455		5.5
9.4	10.0714		13.7333	6.8		6.85714
8.9186	15.2286		5.77273	9		7
5	7		6.33333	9		6.5
12.3333	17.3333		5.90909	11.25		8.22222
37.5	6.66667		5	15.5714		6
7	5.21212		4.33333	12		7.8
4.5	15.5		6	5		7.66667
6	7.5		5	10.6667		5.6
8.66667	4.2		4.66667	18		4.8
8.5	8.71429		11.4286	14.6667		9.75
6.84615	7.61538		4.6	15.5556		6.75
12.25	6.33333		4.33333	19.8333		21
4	4		4	11.6667		8.2
4	8.16667		7	5.5		8.66667
4.5	5.83333		8.13333	5.5		8.14286
8.35294	4		4	18.5		9.8
23.9167	7.85714		4.5	6.5		6
7.25	17.5556		4	4.5		8
5.5	14.4286		4.5	6.33333		15.5
20.75	11.25		11	13		12.8125
4.8	9.83333		39.3285	6.8		6
7.66667	13.4444		4	25.3333		5.5
11.6667	8.33333		4.85714	18.6		6.33333
6.5	15		5.55556	16		16.7857
4.5	5.25		5.66667	4		7.33333
13.375			5.5	7.5		13
17.5526			10.5556	5.5		7.5
8			7	16.75		4
6			10.4	4.66667		5.5
22.4			6.25	19.75		6.25
9			8.2	16		6.25
15.8333			6.33333	5		5.66667
9.375			6	9.16923		7.5
5.6			5.33333	8		4
5			15	22		7
6			7.14286	12		6.5
8.16667			28.7429	16.8667		12.3333
10.4			6	8.25		8.5
8.66667			10	6.33333		5.33333
7.42857			10.8889	10		4
6			32.6923	9		10.6667
11.25			7.8	5		8.4
12.3226			6.25	5.5		5
4.75			8.4	5.625		5.6
9.4			7.93333	7.25		6.25
12			5	5		4.83333
8.66667			8.27273	10		7.6
7.2			10	5		8.83333
9.5			9.90909	5.66667		5.2
10			5	10.5		5.33333
20.5714			6.75	14.1034		8.16667
5.57143			5.25	5.85714		6.5
8.42857			9.25	4.66667		7.5
14.8667			10.8667	6.5		11.5
9.5			15.4468	7		6.05
19.2			6.33333	6		7.33333
4			5.5	10.25		14.6
6.4			9.2	5		6
17.8571			5	4.66667		5.25
5.5			9.8	10.6667		6.66667
4.6			18.25	8		7.5
4.66667			7.9375	10.4		6.875
9.33333			4.66667	7		11.6
13			11.3333	7.33333		9
6.66667			10.5294	8.2		4.5
10.7368			14.9524	11		45.4688
11.1429			9	5		6.4
4.5			11.5	4.5		6.38462
7.38983			11.8	10.6923		9.33333
11.5			25.1667	6.33333		14
6			5.6	6.2		6.33333
8.2			5.5	6.125		4.33333
12.5			15.3333	9.25		6.2
4.5			8.28571	4.5		7.8
13			7.33333	10.2308		8
9.75			4	8.5		6
8.33333			7.33333	12.125		4.75
12.8333			4.66667	14.8571		6.83333
7.5			4	7.30303		4.33333
6.14286			8.04255	12.5		4.5
9.2			5.75	8		5
7.5			29.1111	6.25		6
5.5			4.5	18.3636		5
6.77778			4.5	10.5		7
9.84615			10.7778	13.3333		4.5
7.75			6	18.5		16.3333
10.76			5.5	15.75		9.66667
8.66667			4.66667	14.3333		10.625
8			4.75	6.83333		6.33333
5.28571			5.2	7.5		8.28
11			4.16667	6		11.6667
9.33333			5.33333	12.75		5
6.25			4.66667	13		6.5
16			4.5	4.66667		9.6
8			7.25	14		5
6.66667			7.61538	7.5		5.8
5.54545			5.5	5.5		7
9.33333			6	4		4.5
5			9	6.14286		4.85714
7.66667			7.25	6.5		7
6			4	8.5		6
5			14.311	10.7143		6.5
5			4.5	10.1429		13
6.6			11.2492	13.6667		6.66667
7.66667			9.5	13.25		7
7.66667			8.75	5		8.71429
4.33333			6	12.75		10
5.42857			9.27273	19.6667		7.33333
5.66667			7.25	7.09091		8.875
5			12.8889	5.66667		6
5.5			10.5714	10		6.4
10.375			9	7		5
7.14286			8	12.875		28
7			5.5	5		6.33333
4.5			5.75	7.5		6
6.2			7	6.5		6
5.33333			6.66667	5		15.5
10.3333			6.4	5.66667		13.5
5.33333			6.66667	6.6		6
9.6			9.6	6.75		5.5
9			4.5	34.5		7
6.5			5.33333	15.6667
8.5			6	5.5
15.1667			10	10.5556
5.5			4.5	6
6.6			8.71429	13
5			11.375	7
6.5			6	4.33333
7.33333			4.8	4
5			13.9286	9.5
7.875			7.09091	9
22			4.5	5.33333
4.66667			12.6	10.1333
7.6			14.8333	4
7.14286			15.4066	5
7.8			5	8.85714
4.33333			5.33333	7.66667
16.5833			12.5455	7.5
9			12	21.6667
5			9.25	10.25
9.77778			14.9727	9.8
7			15.2759	27.3333
8			5	6.66667
6.25			15.0033	16.6667
8.53333			5.66667	6.66667
10.3333			6	8.79167
6.45455			9.8	9.5
4.75			7.57143	11.5
5			5.33333	4
5.75			5.5	14.2857
9.42857			5.75	7.42857
7.4			7.75	28.2
4			11.85	13.5
9.75			8.13861	28
6.52381			9.30769	13
5			5	14.8
4.5			4.66667	17.2
6.33333			4.75	6.75
4			7.09091	4.5
7.5			7	6
5.75			12.7196	6.5
5.6			7	11.6
7.33333			4	9.5
6.6			7	6.5
9.75			4.5	4
9			5.25	4.5
6.69231			4.66667	13.5
5			4	6.75
7.875			11.125	4
5			4	6.5
7.5			5.66667	6
5.66667			9	7.4
4			7.8	5
7.11111			10.5	10
4.33333			7	9.66667
5.5			6.8	8.75
4.8			5	9
5.28571			6	13.75
9			26.3727	7
4.5			4.5	11.4
5.5			5.5	7
4.75			5.28571	17.4545
6.25			20.0957	10
5.5			7.75	7.25
6.33333			4.5	10.4444
4.33333			11	7.8
8.54545			4.75	4.66667
4			13.4812	10.8333
4			5.5	8.2
12			4.5	7.85714
4			10.3636	10
6.27778			5.2	9.5
5.5			5.75	16
5			14.1111	6.57143
6.66667			9.65517	5
8			8.27273	6
7.8			5.75	6.5
5.625			6.66667	14.5556
6.4			4	9.8
4.66667			6.66667	7.5
5			11	4
6.32			9	19.6667
5.5			8.33333	8.92593
5.66667				8
6.33333				6.5
6.66667				14.3333
4.5				30.75
5.69231				18
16.75				4.66667
5				4.33333
5.66667				10.4286
4.5				7.6
4.5				13.875
4.33333				8.5
8				6.25
5.6875				18.125
29.2				6
4.4				6.64286
11.1667				4
8.3				8.3125
5.33333				6.5
6				7.66667
5.66667				5
8.75				4
4.66667				23.5714
7.64706				5.5
6				8.4
4				6.61765
5				5.66667
4.33333				9.55556
7				12.2778
4.5				10.2857
8				5.15
4.66667				6.33333
6.6				15.4545
				9.125
				7.42857
				13.3
				12.1538
				5.66667
				9.7
				8.78947
				13
				9.38889
				4.66667
				7.5
				7
				7
				12
				7.14286
				13.5294
				6.5
				15.5
				6
				10.1111
				8.66667
				5.33333
				9.875
				7.5
				13.6522
				14.7273
				8.25
				7.5
				7.19048
				9
				8.74522
				5
				8
				7.57143
				4.5
				7.58333
				11.875
				8.25
				7.5
				13.6429
				6
				7.7931
				7.16667
				5
				6.5
				4.6
				8.28571
				4
				4
				5
				5.75
				8.75
				9.375
				9.18182
				7.8
				11.3333
				8.14286
				16.4
				20.6226
				5.5
				6.83333
				9.33333
				4.5
				8.42857
				6.45
				8.57143
				5
				7.83333
				4
				7.57895
				5.77778
				6.71429
				6.4
				9
				16
				5
				8.35714
				5
				4
				9.33333
				4.5
				8
				6.33333
				5.4
				6
				4.5
				6.25
				5.66667
				6.91667
				5.57143
				6
				7.375
				12.9362
				4.33333
				6
				5
				12.9091
				9.66667
				7.625
				6.5
				5.5
				6.125
				10.1154
				8.33333
				31.4286
				8
				5
				9.61539
				12.4
				5
				6.66667
				4.5
				5.6
				7.63636
				6
				4
				5.5
				10.3333
				14.7778
				6.2
				28
				8.1
				8.36364
				5
				22.2571
				10
				19.6667
				6.5
				10.8571
				7.7
				13.8889
				6.85714
				4.4
				10.5
				5
				6.59091
				7.85714
				6
				6.5
				18.5
				4.33333
				6
				6.66667
				12.6667
				4
				7
				15.8889
				6
				9.29412
				7.5
				10.25
				5.8
				7.875
				4.85714
				11.36
				7.71429
				18.5714
				7.11111
				12.2667
				4.5
				5.14286
				4.66667
				6.5
				7.33333
				7.5
				5.66667
				11.3333
				7.08333
				6.83333
				5.33333
				4.75
				7.4
				8.5
				7.5
				6
				7.5

## Sheet: Figure 5-figure supplement 2G
Panel G: Distance to the closest neighbor (nm)
Untreated	LPS	ATP	LPS+ATP	BzATP	LPS+BzATP	MßCD
0.321379	0.221609	0.197877	1.17559	0.318168	0.133599	0.447116
0.606143	0.401997	1.14158	1.17559	0.202736	0.133599	0.253744
0.612876	0.401997	0.197877	1.05906	0.234096	0.253421	0.232204
0.242619	0.42797	0.255256	0.490554	0.368177	0.172046	0.33105
0.316516	0.221609	0.457002	0.133414	0.280712	0.143373	0.380927
0.126667	0.359485	0.269072	0.133414	0.247911	0.253421	0.351137
0.126667	0.150407	1.03433	0.549182	0.12649	0.377359	0.266115
0.19392	0.166797	0.274877	0.253035	0.318168	0.368177	0.260735
0.19392	0.457926	0.466906	0.321123	0.202736	0.261958	0.232204
0.294905	0.150407	0.457002	0.427177	0.101979	0.261958	0.238943
0.198255	0.340078	0.265669	0.253035	0.268668	1.31157	0.278907
0.196256	0.178884	0.269072	0.215407	0.101979	0.15106	0.420027
0.342084	0.163873	0.131319	0.332217	0.234096	0.301305	0.178884
0.292985	0.163873	0.113136	0.321123	0.224142	0.15106	0.164924
0.196256	0.178884	0.748506	1.14665	0.187854	0.752035	0.155099
0.220513	0.210844	0.312128	0.215407	0.19067	0.277091	0.40352
0.124001	0.276553	0.113136	0.933306	0.124077	0.731817	0.238943
0.140039	0.348853	0.178934	0.278299	0.124077	0.606704	0.161246
0.319105	0.277042	0.286744	0.282921	0.297688	1.15619	0.213775
0.193258	0.206772	0.162208	0.278299	0.19067	0.433645	0.213775
0.292985	0.210844	0.544059	0.382043	0.199829	0.284109	0.346996
0.124001	0.276553	0.162208	0.282921	0.215404	0.284109	0.130002
0.146361	0.284428	0.748506	0.220705	0.466475	0.327265	0.163979
0.382528	0.373632	0.305866	0.296135	0.351453	0.433645	0.130002
0.119336	0.277042	0.920869	0.498316	0.220908	0.277091	0.155099
0.119336	0.276565	0.64498	0.220705	0.142772	0.606704	0.215922
0.319105	0.22514	0.248036	0.516138	0.142772	0.296063	0.178884
0.193258	0.273768	0.125788	0.296135	0.187854	0.220277	0.260735
0.146361	0.27785	0.125788	0.369994	0.264766	0.480736	0.163979
0.205733	0.270186	0.120413	0.689638	0.321731	0.220277	0.172771
0.401521	0.185309	0.120413	0.256122	0.297688	0.480736	0.172771
0.205733	0.27785	0.65947	0.253862	0.121654	0.875681	0.161246
0.583653	0.22514	1.64747	0.218684	0.15121	0.53637	0.281114
0.241566	0.260838	0.609881	0.339941	0.199829	0.142196	0.236023
0.266746	0.275183	0.609881	0.218684	0.307617	0.142196	0.286974
0.174992	0.270186	2.55007	0.80252	0.228035	0.25298	0.336004
0.215199	0.265172	0.466858	0.253862	0.345253	0.25298	0.19091
0.24489	0.237698	0.39957	0.632868	0.121654	0.177403	0.150137
0.174992	0.185309	0.169705	0.166413	0.152315	0.177403	0.236023
0.215199	0.207883	0.169705	0.180051	0.239366	0.337879	0.214427
0.248242	0.333015	0.449102	0.166413	0.152931	1.06104	0.22729
0.184088	0.282362	0.449102	0.834509	0.321731	0.447216	0.167743
0.184088	0.471871	0.503235	0.333123	0.217313	0.163755	0.19091
0.126839	0.2975	0.267781	0.632868	0.406264	0.163755	0.149431
0.126839	0.128237	0.503235	0.402715	0.407702	0.534616	0.165078
0.256851	0.160554	0.58237	0.341546	0.152931	0.18571	0.250244
0.25754	0.399224	0.579845	0.880225	0.278283	0.56835	0.214427
0.427857	0.128237	0.267781	0.342347	0.217313	0.574949	0.286748
0.27035	0.341188	0.293349	0.28674	0.25072	1.27266	0.195579
0.224754	0.468188	0.512249	0.270788	0.558126	0.158464	0.212184
0.228229	0.167499	0.341986	0.28674	0.228995	0.152051	0.274867
0.222733	0.579811	0.293349	0.316501	0.278283	0.152051	0.149431
0.340046	0.333197	0.156917	0.509374	0.345253	0.403636	0.195579
0.27035	0.341188	0.393574	0.474355	0.203432	0.171407	0.35756
0.228229	0.184542	0.156917	0.761064	0.334995	0.403636	0.400126
0.234911	0.122067	0.275489	0.233235	0.467287	0.280234	0.245565
0.222733	0.122067	0.237476	0.233235	0.225586	0.394272	0.245565
0.209075	0.347755	0.393574	0.365145	0.271585	0.645691	0.22729
0.223604	0.192668	0.317577	0.463325	0.563956	0.645691	0.165078
0.294717	0.161249	0.206465	0.365145	0.211873	0.698731	0.320157
0.209075	0.468188	0.301474	0.244452	0.333093	0.631492	0.101979
0.523768	0.192668	0.308644	0.410062	0.222289	0.698731	0.216518
0.223604	0.161249	0.206465	0.451861	0.222289	1.12	0.199336
0.233233	0.259878	0.256755	0.620325	0.225586	1.03004	0.199336
0.178298	0.347755	0.268745	0.37567	0.203432	1.03004	0.320157
0.18851	0.158874	0.545568	0.244452	0.202934	0.334692	0.323961
0.18851	0.158874	0.256755	0.504735	0.202934	0.334692	0.291784
0.178298	0.522599	0.161017	0.37567	0.41554	0.520003	0.199369
0.199286	0.453446	0.268745	0.517033	0.172045	0.322489	0.101979
0.250863	0.292688	0.296122	0.579743	0.167045	0.875826	0.314914
0.304632	0.299454	0.161017	0.548777	0.172045	0.322489	0.155065
0.306957	0.107704	0.331953	0.709324	0.167045	0.504425	0.180754
0.240832	0.107704	0.296122	0.290441	0.160449	0.331933	0.223891
0.368083	0.271459	0.252107	0.500122	0.516141	0.600377	0.283195
0.53808	0.340585	0.545568	0.26874	0.160449	0.331933	0.258827
0.240832	0.269073	0.313405	0.246131	0.194885	0.600377	0.169704
0.336156	0.384188	0.161807	0.310613	0.370301	0.263789	0.216518
0.213555	0.483321	0.344416	0.246131	0.18848	0.263789	0.155065
0.202433	0.269073	0.266176	0.26874	0.168364	0.282441	0.180754
0.213555	0.404968	0.161807	0.310613	0.370302	0.20881	0.227059
0.202433	0.404968	0.152021	0.17587	0.277192	0.20881	0.218679
0.474343	0.176625	0.152021	0.498379	0.168364	0.238241	0.291784
0.207099	0.176625	0.21869	0.485867	0.370301	0.344092	0.119333
0.139885	0.248389	0.450354	0.17587	0.177737	0.239526	0.305127
0.235893	0.754432	0.422555	0.229982	0.222707	1.82653	0.119333
0.228909	0.325727	0.5379	0.470592	0.270566	0.356068	0.112875
0.281347	0.325727	0.25473	0.145602	0.234213	0.24962	0.227059
0.249549	0.549748	0.25473	0.428967	0.177737	0.120831	0.168789
0.139885	0.142674	1.89847	0.10469	0.231207	0.358071	0.161246
0.295219	0.474129	0.921997	0.191567	0.234213	0.120831	0.354468
0.207099	0.142674	0.292987	0.10469	0.134167	0.356068	0.168789
0.235893	0.224069	0.615738	0.121654	0.202092	0.145602	0.182085
0.193792	0.168293	0.292987	0.428967	0.830487	0.166797	0.161246
0.429366	0.150335	0.325791	0.209234	0.134167	0.145602	0.295297
0.378829	0.150335	0.325791	0.183595	0.323109	0.335843	0.485718
0.400002	0.168293	1.0472	0.121654	0.202092	0.230269	0.112875
0.193792	0.241351	0.6456	0.126908	0.195988	0.230269	0.180751
0.205912	0.304231	0.132202	0.266161	0.232209	0.292008	0.599842
0.522732	0.567972	0.132202	0.190262	0.195988	0.3975	0.198216
0.256472	0.281053	0.18033	0.190262	0.265447	0.81704	0.456945
0.201613	0.196181	0.168042	0.126908	0.239291	0.137435	0.354683
0.802801	0.196181	0.208805	0.160551	0.268394	0.134165	0.180751
0.452548	0.161245	0.355316	0.243077	0.337167	0.134165	0.392936
0.602991	0.221984	0.262801	0.500001	0.265447	0.434092	0.272027
0.333017	0.161245	0.168042	0.302631	0.262978	0.31455	0.672135
0.201613	0.716983	0.181355	0.495923	0.291372	0.31455	0.287901
0.248904	0.591692	0.248806	0.491938	0.260765	0.253207	0.198216
0.228408	0.159517	0.356044	0.46441	0.309323	0.434092	0.318334
0.333017	0.159517	0.181355	0.243077	0.337167	0.253207	0.184813
0.215925	0.194197	0.133187	0.228033	0.299498	0.295284	0.184813
0.334994	0.290688	0.241732	0.177138	0.308927	0.185178	0.282841
0.0800018	0.377049	0.139999	0.491938	0.184395	0.185178	0.130384
0.0800018	0.581378	0.349791	0.495923	0.223604	0.402492	0.130384
0.334994	0.273579	0.133187	0.177138	0.12649	0.16594	0.184087
0.357774	0.290688	0.335651	0.228033	0.12649	0.402492	0.206155
0.449094	0.581378	0.241732	0.215403	0.175372	0.130385	0.206155
0.329122	0.371723	0.767266	0.308422	0.169342	0.1224	0.16033
0.63137	0.376505	0.335651	0.224745	0.175221	0.1224	0.63855
0.308058	0.371723	0.404243	0.215403	0.139999	0.122506	0.138643
0.25554	0.433852	1.65881	0.482411	0.139999	0.122506	0.247392
0.161245	0.517303	0.341303	0.196467	0.452217	0.311505	0.177904
0.161245	0.517303	1.33686	0.282845	0.169342	0.311505	0.16033
0.295614	0.287272	0.214997	0.196467	0.161246	0.321627	0.247392
0.155067	0.287272	0.214997	0.407064	0.194979	0.184057	0.177904
0.155067	0.201956	0.433382	0.220609	0.164924	0.252983	0.191962
0.272025	0.201956	0.342937	0.140635	0.271453	0.518367	0.138643
0.0894414	0.938615	0.342937	0.196867	0.452217	0.184057	0.54267
0.269669	0.3851	0.519998	0.170879	0.271453	0.252983	0.343657
0.272025	0.739163	0.565767	0.282845	0.183424	0.275071	0.538146
0.0894414	0.41605	0.269653	0.140635	0.212605	0.432668	0.348457
0.236455	0.3851	0.269653	0.15559	0.230964	0.194187	0.348457
0.339998	0.192677	0.256125	0.170879	0.183424	0.153268	0.254561
0.596937	0.180279	0.290671	0.15559	0.212605	0.298568	0.357769
0.205373	0.180279	0.256125	0.347243	0.375766	0.153268	0.200329
0.205373	0.0799999	0.420055	0.179106	0.342345	0.429534	0.343657
0.14719	0.0799999	0.290671	0.347243	0.189617	0.298568	0.369909
0.14719	0.172629	0.246736	0.235372	0.253336	0.239397	0.200329
0.272223	0.270184	0.246736	0.2502	0.118136	0.634657	0.235912
0.223508	0.2506	0.334395	0.162208	0.118136	0.239397	0.349036
0.254491	0.230868	0.602991	0.162208	0.253336	0.276585	0.163859
0.219903	0.230868	0.460434	0.407624	0.101979	0.211952	0.163859
0.254491	0.146819	0.334395	0.191773	0.101979	0.0999985	0.282252
0.40672	0.146819	0.352832	0.467738	0.167066	0.0999985	0.202759
0.223973	0.20537	0.244131	0.873563	0.167066	0.211952	0.235912
0.0991091	0.256125	0.244131	0.552022	0.236738	0.491816	0.161379
0.113529	0.168527	0.508272	0.169704	0.286533	0.273508	0.161379
0.113529	0.20537	0.403492	0.467738	0.288442	0.421093	0.43256
0.0991091	0.360062	0.229921	0.156869	0.35514	0.360244	0.297953
0.23838	0.168527	0.508272	0.863768	0.286533	0.273508	0.231028
0.2456	0.499998	0.403492	0.156869	0.382852	0.319249	0.279207
0.223973	0.409725	0.229921	1.26246	0.122569	0.386364	0.407255
0.229393	0.313048	0.341148	0.252287	0.122569	0.323387	0.286745
0.26057	0.212131	0.37632	0.678703	0.25473	0.139715	0.192296
0.306956	0.360556	0.29732	0.228032	0.25473	0.489329	0.186917
0.229393	0.324869	0.226274	0.332867	0.393953	0.139715	0.226764
0.252927	0.212131	0.29732	0.310866	0.393953	0.247214	0.180104
0.252927	0.197805	0.226274	0.310866	0.175728	0.198321	0.180104
0.483005	0.360556	0.156701	0.191773	0.494583	0.172046	0.186917
0.357492	0.338635	0.156701	0.228032	0.175728	0.462448	0.243735
0.170356	0.197805	0.224722	0.140196	0.494583	0.201286	0.231028
0.180278	0.339999	0.187064	0.140196	0.401585	0.198321	0.283001
0.203134	0.335672	0.224722	0.265499	0.424556	0.116618	0.237655
0.393639	0.150843	0.143178	0.227839	0.401585	0.201286	0.226764
0.180278	0.339999	0.143178	0.182602	0.300814	0.157143	0.243735
0.170356	0.150843	0.203958	0.259895	0.300814	0.116618	0.377241
0.301495	0.304138	0.203958	0.265499	0.242036	0.293004	0.237655
0.323109	0.147568	0.400501	0.182602	0.242036	0.331886	0.283001
0.211687	0.401993	0.309282	0.225354	0.170816	0.377162	0.232035
0.164009	0.284933	0.400501	0.227839	0.341585	0.48427	0.178404
0.175513	0.147568	0.26077	0.225354	0.170816	0.293004	0.178404
0.164009	0.304138	0.288442	0.619152	0.481663	0.567331	0.257013
0.175513	0.279683	0.26077	0.16763	0.152315	0.49428	0.190232
0.138923	0.279683	0.288442	0.619152	0.152315	0.208274	0.178773
0.238773	0.181108	0.23927	0.125397	0.585224	0.321906	0.257013
0.138923	0.255975	0.573002	0.125397	0.224008	0.523727	0.133502
0.238773	0.181108	0.23927	0.206991	0.349314	0.208274	0.451127
0.148057	0.283435	0.447255	0.136014	0.224008	0.222338	0.190232
0.160555	0.249373	0.447255	0.942362	0.344096	0.852545	0.580993
0.148057	0.184391	0.206231	0.136014	0.344096	0.626132	0.133502
0.160555	0.23716	0.206231	0.248943	0.382103	0.461489	0.268906
0.213753	0.463895	0.31335	0.191039	0.12649	0.20967	0.691124
0.429283	0.144224	0.243312	0.408878	0.12649	0.406631	0.189737
0.137439	0.144224	0.240002	1.04139	0.166698	0.210817	0.217151
0.29684	0.283435	0.240002	0.533667	0.382103	0.229395	0.253894
0.082464	0.134996	0.280857	0.191039	0.166698	0.120336	0.249302
0.082464	0.356707	0.334005	0.249571	0.210068	0.210817	0.189737
0.137439	0.182781	0.262842	0.231939	0.210068	0.278927	0.217151
0.393726	0.134996	0.198025	0.196515	0.36359	0.354402	0.254117
0.162654	0.111803	0.198025	0.229093	0.307497	0.229395	0.364967
0.198048	0.111803	0.203362	0.641796	0.212599	0.558264	0.410151
0.162654	0.179134	0.170292	0.186816	0.353833	0.120336	0.244962
0.198048	0.179134	0.170292	0.186816	0.291204	0.216333	0.219217
0.378717	0.587952	0.262842	0.247388	0.331058	0.100001	0.254117
0.393726	0.341761	0.20498	0.320382	0.212605	0.100001	0.12649
0.261833	0.178501	0.180058	0.685051	0.331058	0.205911	0.404968
0.160555	0.292746	0.20498	0.226726	0.153883	0.368179	0.0894448
0.160555	0.178501	0.327264	0.231939	0.153883	0.433663	0.0894448
0.37989	0.503778	0.180058	0.111656	0.208806	0.723112	0.219217
0.297111	0.138923	0.219997	0.111656	0.208806	0.216333	0.504779
0.216665	0.138923	0.340459	0.289658	0.110958	0.618638	0.33541
0.150011	0.245665	0.45651	0.327271	0.244785	0.243357	0.159011
0.150011	0.542802	0.494052	0.341712	0.325984	0.368179	0.159011
0.516237	0.245665	0.419765	0.206156	0.323168	0.124542	0.522293
0.324094	0.134771	0.419765	0.206156	0.212605	0.501146	0.725226
0.248103	0.134771	0.65253	0.170879	0.125255	0.320624	0.193966
0.307116	0.426525	0.169707	0.278423	0.228233	0.124542	0.208271
0.332415	0.223062	0.169707	0.23096	0.125255	0.543035	0.396231
0.169257	0.352827	0.604062	0.163595	0.110958	0.308474	0.193966
0.248103	0.481667	0.210525	0.163595	0.603179	0.151455	0.173848
0.384708	0.152171	0.494624	0.327271	0.199251	0.128064	0.465426
0.169257	0.140911	0.447213	0.0894396	0.266518	0.15366	0.133992
0.349799	0.152171	0.210525	0.429912	0.191022	0.501146	0.133992
0.139204	0.140911	0.245409	0.289658	0.244785	0.57615	0.329269
0.221417	0.16287	0.245409	0.186817	0.191022	0.128064	0.227063
0.234407	0.352827	0.193132	0.230867	0.199251	0.893801	0.126494
0.139204	0.123483	0.332373	0.0894396	0.287904	0.120415	0.126494
0.269002	0.123483	0.248912	0.325512	0.25428	0.120415	0.166011
0.281976	0.200558	0.193132	0.186817	0.25428	0.760002	0.227063
0.15322	0.178802	0.332373	0.324996	0.289277	0.351033	0.240921
0.152026	0.180181	0.248912	0.397587	0.269073	0.246224	0.372375
0.234407	0.126489	0.592029	0.200002	0.280396	0.402493	0.329269
0.281976	0.126489	0.295748	0.241663	0.194365	0.246224	0.294276
0.291224	0.180181	0.324237	0.344418	0.116618	0.630634	0.232717
0.269002	0.678592	0.592029	0.200002	0.258554	0.480169	0.166011
0.163219	0.680967	0.130001	0.344418	0.116618	0.369508	0.23747
0.193125	0.12671	0.130001	0.29877	0.243026	0.604952	0.173142
0.274063	0.478981	0.301499	0.149572	0.142798	0.387592	0.23747
0.14422	0.12671	0.352205	0.525645	0.142798	0.250347	0.20285
0.251084	0.148055	0.301499	0.232684	0.151822	0.17182	0.388385
0.163219	0.148055	0.152972	0.171888	0.265756	0.250347	0.408013
0.485077	0.316723	0.324237	0.250987	0.130001	0.17088	0.173142
0.274063	0.181629	0.514199	0.149572	0.21587	0.176508	0.275882
0.171174	0.191334	0.410994	0.200459	0.130001	0.185263	0.20285
0.14422	0.152315	0.514199	0.0999985	0.151822	0.100002	0.138929
0.343656	0.152315	0.442421	0.0999985	0.260228	0.104348	0.138929
0.133414	0.395921	0.127367	0.213827	0.172047	0.248395	0.235206
0.171174	1.74355	0.92347	0.232684	0.223507	0.17182	0.373013
0.133414	0.478981	0.58856	0.431189	0.248541	0.104348	0.138288
0.206496	0.181629	0.127367	0.347363	0.294935	0.100002	0.138288
0.16	0.26998	0.107702	0.200459	0.200877	0.136528	0.352293
0.194364	0.59053	0.107702	0.226374	0.183442	0.21792	0.177307
0.155486	0.179501	0.340718	0.179552	0.172047	0.136528	0.362092
0.194364	0.179501	0.340718	0.576854	0.21587	0.122064	0.172919
0.266832	0.26998	0.483321	0.22027	0.200877	1.10725	0.172919
0.335412	0.224722	0.32249	0.171888	0.309096	0.970727	0.288718
0.16	0.576621	0.349288	0.22027	0.16615	0.690571	0.304122
0.155486	0.340192	0.468617	0.116622	0.419236	0.690571	0.2673
0.297024	0.340192	1.02865	0.221612	0.177417	0.754067	0.240511
0.137438	0.224722	0.41382	0.221612	0.230287	0.970727	0.366121
0.137438	0.125397	0.315793	0.144064	0.198046	1.09344	0.2673
0.348858	0.248041	0.238167	0.285222	0.177417	0.131531	0.142398
0.248102	0.143178	0.276415	0.280857	0.198046	0.131531	0.142398
0.329307	0.143178	0.397452	0.259115	0.275229	1.07703	0.240511
0.279541	0.125397	0.315793	0.116622	0.394231	0.726394	0.318721
0.292061	0.47239	0.238167	0.241479	0.16082	0.746787	0.139206
0.202478	0.156209	0.276415	0.236081	0.253094	0.145087	0.121493
0.292061	1.74355	0.161111	0.261394	0.205193	0.145087	0.318721
0.176334	0.156209	0.242674	0.335294	0.16082	0.461736	0.456072
0.176334	0.223604	0.375766	0.17088	0.183319	0.366908	0.121493
0.279541	0.532008	0.241082	0.144064	0.398774	0.529358	0.371723
0.476744	0.234342	0.122564	0.347363	0.333291	0.141423	0.246761
0.202917	0.234342	0.281347	0.285222	0.183319	0.18	0.200502
0.208808	0.237395	0.665478	0.29177	0.205193	0.234093	0.200502
0.122567	0.238286	0.122564	0.195082	0.082464	0.141423	0.371723
0.122567	0.826504	0.230669	0.220792	0.150002	0.163979	0.312326
0.208808	0.887893	0.230669	0.335294	0.150002	0.234093	0.805232
0.21045	0.887893	0.391962	0.17088	0.160061	0.163979	0.23466
0.304633	0.099106	0.35496	0.290331	0.35103	0.401994	0.301448
0.500455	0.364198	0.391962	0.195082	0.082464	0.281266	0.229264
0.178886	0.405265	0.35496	0.162346	0.12554	0.281266	0.23466
0.557537	0.196166	0.258888	0.122567	0.398774	0.551546	0.251467
0.178886	1.05124	0.426329	0.220792	0.160061	0.289332	0.164506
0.214845	0.420477	0.154277	0.185557	0.12554	0.289332	0.499115
0.680212	0.099106	0.154277	0.122567	0.385848	1.53296	0.251467
0.178999	0.576111	0.191019	0.185557	0.569521	1.31267	0.268409
0.178999	0.611922	0.451051	0.329175	0.320596	0.298143	0.208391
0.742268	0.860232	0.426329	0.2883	0.163239	0.298143	0.164506
0.335674	0.576111	0.281441	0.330955	0.442398	1.33313	0.301846
0.680212	0.407541	0.286354	0.624349	0.163239	0.347292	0.404966
0.335674	0.407541	0.281441	0.17349	0.246663	0.347292	0.357927
0.280716	0.75572	0.116618	0.17349	0.246663	0.261448	0.348755
0.280716	0.25123	0.101983	0.362707	0.391524	0.261448	0.110393
0.286354	0.272028	0.116618	0.329175	0.461738	1.34439	0.404966
0.27203	0.272028	0.477399	0.360729	0.24267	0.361133	0.0991114
0.396984	0.25123	0.101983	0.329849	0.373905	0.361133	0.223435
0.177142	0.75572	0.418184	0.225969	0.391524	0.364005	0.301846
0.27203	0.357996	0.327014	0.231497	0.312314	0.35847	0.496236
0.177142	0.532616	0.327014	0.2883	0.316036	0.521624	0.294313
0.154778	0.543591	0.224537	0.585338	0.329309	0.364005	0.0991114
0.396984	0.357996	0.224537	0.225969	0.228035	0.35847	0.228303
0.255522	0.110454	0.611311	0.237954	0.415286	0.128061	0.249623
0.154778	0.110454	0.21475	0.223164	0.316036	0.232722	0.190257
0.302363	0.281514	0.171291	0.302814	0.228035	0.512097	0.190257
0.205733	0.577194	0.171291	0.197989	0.329313	0.128061	0.188181
0.288803	0.177201	0.200525	0.233238	0.461353	0.201682	0.256388
0.313255	0.126492	0.172045	0.197989	0.329309	0.201682	0.202239
0.192845	0.126492	0.172045	0.223164	0.231421	0.29494	0.507773
0.310479	0.341475	0.611311	0.139999	0.360557	0.408231	0.210905
0.156917	0.341475	0.233898	0.139999	0.354338	0.535535	0.202239
0.155821	0.202482	0.436229	0.233238	0.32694	0.179235	0.198092
0.155821	0.202482	0.233898	0.137408	0.742557	0.220286	0.164198
0.288803	1.28577	0.754519	0.277847	0.354338	0.301793	0.188181
0.156917	0.353836	0.445239	0.533751	0.376566	0.220286	0.210224
0.338281	0.796493	0.905096	0.137408	0.605762	0.353961	0.249753
0.387584	0.765375	0.616001	0.274875	0.200251	0.153912	0.423012
0.423794	0.487647	0.905096	0.208717	0.325576	0.334589	0.496236
0.265551	0.729931	0.248908	0.146502	0.200251	0.273437	0.423012
0.471408	0.487647	0.248908	0.146502	0.357771	0.179235	0.164198
0.346357	0.729931	0.152314	0.413706	0.298915	0.153912	0.133502
0.202047	0.697075	0.152314	0.447531	0.298915	0.607906	0.198092
0.158077	0.417794	0.168156	0.312302	0.357771	0.502909	0.426721
0.158077	0.219273	0.180277	0.601666	0.228751	0.206493	0.210905
0.202047	0.197583	0.125299	0.312302	0.228751	0.230145	0.199251
0.149932	0.848762	0.610738	0.278138	0.271643	0.324756	0.199251
0.341331	0.197583	0.125299	0.119999	0.227438	0.428741	0.212708
0.289914	0.397294	0.168156	0.382574	0.271643	0.366725	0.133502
0.289914	0.317619	0.181108	0.119999	0.255259	0.355091	0.272886
0.149932	0.191632	0.240416	0.164923	0.227438	0.327735	0.2502
0.325438	0.211869	0.259382	0.164923	0.255259	0.177535	0.247744
0.200551	0.191631	0.360035	0.30675	0.280572	0.357771	0.291984
0.183853	0.14422	0.249595	0.134164	0.301062	0.227548	0.34409
0.279574	0.191631	0.308473	0.278138	0.256649	0.177535	0.21929
0.183853	0.289246	0.493966	0.134164	0.256649	0.322006	0.183576
0.205259	0.14422	0.240416	0.165735	0.216072	0.234094	0.131527
0.125788	0.1772	0.22535	0.165735	0.358138	0.33057	0.207258
0.400644	0.1772	0.19439	0.384619	0.40535	0.122064	0.207258
0.1886	0.289246	0.214683	0.284937	0.344092	0.18042	0.18135
0.380791	0.225611	0.286354	0.284937	0.216072	0.227548	0.426721
0.205259	0.225611	0.214683	0.677035	0.40535	0.122064	0.306411
0.440258	0.168882	0.22535	0.286925	0.467958	0.363498	0.249691
0.125788	0.400001	0.163978	0.785024	0.529007	0.149072	0.204351
0.161249	0.895447	0.318781	0.677035	0.367695	0.169966	0.204351
0.214994	0.300665	0.0991047	0.279126	0.406326	0.169879	0.195004
0.356212	0.18	0.176647	0.185751	0.367695	0.554239	0.18135
0.220908	0.168882	0.0991047	0.21258	0.209333	0.149072	0.245331
0.161249	0.400001	0.163978	0.185751	0.492949	0.187487	0.131527
0.413202	0.214106	0.161245	0.21258	0.209333	0.234094	0.183576
0.299108	0.196063	0.161245	0.222924	0.198394	0.169879	0.271315
0.453329	0.211105	0.556055	0.286356	0.198394	0.161557	0.245331
0.229147	0.196063	0.255516	0.177025	0.184392	0.18042	0.16427
0.360553	0.481664	0.19439	0.357635	0.161245	0.235609	0.249691
0.295704	0.895447	0.0900002	0.177025	0.161245	0.273353	0.146741
0.229147	0.376165	0.255516	0.201867	0.350328	0.191281	0.144299
0.191415	0.236512	0.41944	0.208827	0.150739	0.121445	0.174888
0.191415	0.236512	0.176647	0.201867	0.150739	0.182337	0.164148
0.46044	1.28253	0.0900002	0.204312	0.164042	0.182337	0.578068
0.224107	1.40869	0.16	0.491232	0.309345	0.154631	0.195004
0.380788	1.28253	0.207095	0.274873	0.164042	0.191281	0.174888
0.174376	0.424687	0.275605	0.228035	0.880291	0.121445	0.146741
0.297861	0.938137	0.207095	0.274873	0.309345	0.154631	0.164148
0.174376	0.424687	0.422163	0.393081	0.172152	0.402243	0.144299
0.309555	0.891263	0.286435	0.393081	0.172152	0.773434	0.314183
0.309555	0.891263	0.271455	0.297565	0.32782	0.249678	0.116621
0.380788	0.269072	0.286976	0.297565	0.387334	0.415714	0.110954
0.814441	0.269072	0.364792	0.404472	0.212875	0.211532	0.231873
0.323387	1.38394	0.293287	0.404472	0.170293	0.415714	0.141934
0.291205	0.591486	0.271455	1.57929	0.224731	0.278292	0.231873
0.135975	0.152315	0.188285	1.36538	0.276689	0.393743	0.110954
0.379611	0.331849	0.134974	0.795993	0.170293	0.196404	0.141934
0.135975	0.679529	0.175373	0.212602	0.276689	0.704529	0.201535
0.279375	0.152315	0.188285	0.212602	0.430818	0.245953	0.174469
0.169965	0.227057	0.286435	0.795993	0.302552	0.654144	0.226887
0.322561	0.164924	0.789176	0.199778	0.31411	0.401992	0.29452
0.174135	0.164924	0.365416	0.165059	0.265893	0.196404	0.201535
0.167152	0.155785	0.270165	0.136011	0.350872	0.223752	0.566765
0.68701	0.384642	0.293287	0.136011	0.265893	0.353683	0.302912
0.174135	0.314466	0.175373	0.492994	0.212999	0.211698	0.29053
0.379611	0.333933	0.201325	0.428229	0.212999	0.381713	0.29053
0.167152	0.149071	0.236701	0.645107	0.366196	0.307191	0.33
0.218885	0.155785	0.17321	0.492994	0.153911	0.281223	0.26651
0.218885	0.374358	0.225548	0.852352	0.229107	0.211698	0.368063
0.155493	0.149071	0.11249	0.583704	0.153911	0.511994	0.623235
0.297532	0.219899	0.11249	0.923472	0.164654	0.122064	0.18856
0.155493	0.208581	0.237511	0.583704	0.242675	0.160248	0.172501
0.113531	0.374358	0.134974	0.66483	0.335261	0.155562	0.226665
0.341487	0.333933	0.270165	0.66483	0.164654	0.143114	0.226665
0.294399	0.128062	0.150372	1.07703	0.484542	0.155562	0.501597
0.113531	0.379357	0.32111	1.07703	0.39712	0.381713	0.194895
0.230869	0.501597	0.17321	0.508652	0.243609	0.122064	0.371618
0.182431	0.128062	0.225548	0.613516	0.243609	0.160248	0.172501
0.256122	0.208581	0.150372	0.508652	0.234939	0.181906	0.356588
0.183059	0.179218	0.383297	0.533468	0.234939	0.120188	0.26651
0.396006	0.107007	0.32111	0.341267	0.373361	0.120188	0.194895
0.181159	0.298973	0.357771	0.609743	0.373361	0.139943	0.33
0.243275	0.176008	0.582352	0.613516	0.282842	0.496536	0.328309
0.140911	0.107007	0.491938	0.152315	0.282842	0.139943	0.27327
0.181159	0.600733	0.393019	0.496687	0.295895	1.08933	0.109951
0.183059	0.571847	0.357771	0.125255	0.744269	0.316088	0.109951
0.140911	0.176008	0.478138	0.537412	0.295895	0.387279	0.415322
0.243275	0.437376	0.447194	0.513267	0.400945	0.496536	0.328309
0.304122	0.696162	0.555298	0.125255	0.208378	0.35909	0.148861
0.306736	0.193333	0.343406	0.24083	0.208378	0.220841	0.282358
0.288449	0.442284	0.540814	0.152315	0.223608	0.509671	0.134164
0.288449	0.133686	0.343406	0.133502	0.432665	0.253862	0.134164
0.310123	0.133686	0.392175	0.496687	0.19573	0.430636	0.191022
0.234943	0.375256	0.514022	0.318065	0.19573	0.197989	0.191022
0.313406	0.340637	0.168496	0.318065	0.969913	0.358821	0.163368
0.181656	0.193333	0.168496	0.483324	0.246532	0.220841	0.200995
0.349284	0.959543	0.831866	0.411886	0.252124	0.197989	0.355921
0.310644	0.162754	0.397562	0.179633	0.252124	0.262637	0.295827
0.292061	0.162754	0.500796	0.179633	0.339999	0.122566	0.163368
0.181656	0.442284	0.282841	0.211897	0.50577	0.122566	0.319445
0.277957	0.495544	0.167514	0.361245	0.339999	0.207459	0.307861
0.292061	0.375256	0.232207	0.336611	0.28227	0.216333	0.319445
0.116621	0.482657	0.167514	0.211897	0.718051	0.137918	0.203961
0.124822	0.413015	0.232207	0.624518	0.280569	0.137918	0.265905
0.488244	0.184042	0.210257	0.240832	0.679316	0.155469	0.265905
0.424873	0.184042	0.116616	0.6021	0.275128	0.207459	0.203961
0.0999985	0.305159	0.216	0.152315	0.280569	0.262637	0.286143
0.0999985	0.199813	0.239857	0.152315	0.275128	0.352067	0.133333
0.245598	0.199813	0.199626	0.45607	0.220958	0.496028	0.288605
0.201357	0.170748	0.116616	0.27885	0.260346	0.137616	0.133333
0.172291	0.170748	0.48314	0.572781	0.220958	0.333332	0.409236
0.172291	0.191428	0.210257	0.513291	0.185233	0.199451	0.227893
0.201357	0.223605	0.216	0.197367	0.185233	0.329496	0.189503
0.245598	0.0894439	0.342343	0.181108	0.316532	0.137616	0.301757
0.22472	0.0894439	0.48314	0.158556	0.318729	0.199451	0.288605
0.139195	0.154498	0.342343	0.181108	0.66784	0.496028	0.286143
0.73402	0.154498	0.111753	0.907082	0.379608	0.294828	0.227893
0.139195	0.480677	0.245038	0.45607	0.316532	0.301147	0.409236
0.276522	0.789744	0.111753	0.120416	0.131989	0.295436	0.405121
0.235151	0.55463	0.203962	0.165939	0.131989	0.295436	0.329848
0.276522	0.166667	0.227059	0.165939	0.44507	0.268741	0.312126
0.320351	0.166667	0.156913	0.158556	0.118136	0.119999	0.154932
0.155333	0.225564	0.223156	0.236107	0.220363	0.3245	0.405121
0.722586	0.225564	0.336155	0.120416	0.242673	0.239998	0.272275
0.476366	0.55463	0.156913	0.237303	0.118136	0.119999	0.149071
0.378452	1.02972	0.313405	0.188511	0.291876	0.3245	0.154932
0.155333	0.251162	0.351512	0.386958	0.220363	0.155469	0.149071
0.463249	0.25517	0.395047	0.236107	0.19008	0.281761	0.272275
0.688249	0.424391	0.43812	0.164654	0.242673	0.170001	0.348212
0.332865	0.25517	0.467282	0.189737	0.19008	0.169704	0.214685
0.395981	0.403541	0.395047	0.199078	0.379688	0.210218	0.173277
0.184947	0.608061	0.295589	0.20414	0.253679	0.228471	0.173277
0.492159	0.458958	0.158641	0.141421	0.291876	0.170001	0.232571
0.412269	0.541091	0.158641	0.141421	0.379688	0.169704	0.232571
0.184947	0.442719	0.261781	0.347116	0.273778	0.434177	0.161245
0.695955	0.254405	0.236945	0.19611	0.192768	0.28883	0.333769
0.197297	0.156204	0.467282	0.550715	0.192768	0.434177	0.161245
0.395981	0.254405	0.258722	0.130384	0.342568	0.16333	0.19723
0.170072	0.156204	0.108525	0.487173	0.123696	0.752894	0.293468
0.170072	0.260002	0.108525	0.130384	0.242467	0.16333	0.19723
0.399148	0.470958	0.418462	0.205132	0.223462	0.32491	0.293468
0.121651	0.261724	0.318676	0.199078	0.381864	0.120832	0.387514
0.190901	0.432784	0.107704	0.121656	0.184393	0.103845	0.287348
0.212602	0.399299	0.176704	0.189389	0.123696	0.763473	0.300665
0.128062	0.848999	0.107704	0.189389	0.336243	0.103845	0.387514
0.407823	0.685001	0.212605	0.440661	0.184393	0.137438	0.162509
0.121651	1.01081	0.245601	0.121656	0.223607	0.137438	0.162509
0.128062	1.01616	0.141422	1.2474	0.342568	0.16	0.237848
0.32	0.380838	0.212605	0.219318	0.336243	0.16	0.209563
0.391294	0.325754	0.245601	0.322026	0.210237	0.492839	0.176549
0.381339	0.22914	0.141422	0.177151	0.210237	0.40857	0.411203
0.220905	0.22914	0.277965	0.440661	0.235136	0.311494	0.176549
0.220905	0.325754	0.176921	0.177111	0.246983	0.461736	0.394262
0.223607	0.26025	0.165896	0.387227	0.189785	0.40857	0.394262
0.350942	0.373568	0.280712	0.177151	0.189785	0.220707	0.330993
0.223607	0.133998	0.126489	0.322026	0.106876	0.806686	0.390105
0.241658	0.133998	0.176921	0.177111	0.241661	0.220707	0.429837
0.276586	1.05347	0.165896	0.425463	0.314467	0.468768	0.330993
0.25581	0.604769	0.1	0.178886	0.106876	0.282997	0.737127
0.337521	0.900423	0.1	0.178886	0.20838	0.468768	0.300106
0.181108	0.379473	0.370286	0.193982	0.280392	0.619678	0.213354
0.181108	0.423409	0.190396	0.109141	0.152314	0.347508	0.34145
0.782368	0.379473	0.277965	0.109141	0.273659	0.424791	0.34145
0.786697	0.942929	0.250002	0.185712	0.212602	0.459225	0.213354
0.28117	0.942929	0.393559	0.632457	0.153913	0.308023	0.268744
0.259358	0.900423	0.206775	0.185712	0.240368	0.331058	0.240024
0.191051	0.660618	0.453384	0.48	0.200554	0.475562	0.26675
0.259358	0.220908	0.223606	0.51264	0.219999	0.241239	0.240024
0.242394	0.0799999	0.244515	0.298812	0.280392	0.331058	0.993353
0.178885	0.0799999	0.223606	0.29119	0.22511	0.308023	0.26675
0.200556	0.574087	0.135976	0.255988	0.172948	0.238777	0.386743
0.242394	0.68765	0.135976	0.255988	0.189737	0.238777	0.178932
0.178885	0.200724	0.205349	0.181108	0.153913	0.313404	0.247196
0.224031	0.772012	0.289304	0.234853	0.160558	0.318286	0.178932
0.500451	0.185607	0.371213	0.181108	0.200554	0.126842	0.267062
0.200556	0.200724	0.26833	0.312399	0.22511	0.40752	0.200262
0.224031	0.640302	0.731056	0.193982	0.219999	0.318286	0.200262
0.265151	0.185607	0.280052	0.445575	0.313789	0.126842	0.247196
0.436805	0.2275	0.276542	0.440203	0.212943	0.324304	0.269667
0.265151	0.129713	0.236496	0.111749	0.189737	0.221909	0.228231
0.203962	0.812157	0.450157	0.345254	0.345712	0.40752	0.311684
0.225585	0.129713	0.236496	0.111749	0.320347	0.429483	0.228231
0.203962	1.1251	0.312026	0.145602	0.160558	0.22201	0.364723
0.379387	0.318848	0.276542	0.133336	0.137438	0.199029	0.359382
0.225585	0.318848	0.21292	0.119999	0.212943	0.297024	0.541268
0.26077	0.200998	0.113588	0.119999	0.449098	0.199029	0.311684
0.544059	0.200998	0.0894448	1.75169	0.147631	0.375872	0.212602
0.247028	0.23	0.0894448	0.215407	0.297914	0.153806	0.843271
0.161245	0.238192	0.386265	0.182191	0.377357	0.153806	0.528997
0.487216	0.36556	0.204019	0.206344	0.137438	0.180913	0.212602
0.281347	0.448179	0.113588	1.34249	0.141421	0.2129	0.227456
0.129444	0.323099	0.236007	0.2959	0.141421	0.227452	0.301064
0.129444	0.238192	0.232136	0.215407	0.320347	0.180913	0.1497
0.161245	0.254869	0.42358	0.231909	0.243017	0.294208	0.1497
0.315875	0.28698	0.167201	0.231909	0.334974	0.441739	0.237811
0.200555	0.254869	0.21292	0.226362	0.148512	0.679117	0.155491
0.311127	0.36556	0.291548	0.154631	0.234452	0.190073	0.237811
0.183427	0.266442	0.130726	0.115434	0.18714	0.12554	0.238584
0.487216	0.581649	0.130726	0.115434	0.147577	0.279352	0.192413
0.504071	0.273702	0.580034	0.20234	0.215407	0.12554	0.255625
0.223606	0.210105	0.49592	0.191587	0.243017	0.240092	0.143606
0.141419	0.266442	0.450857	0.283102	0.354901	0.240092	0.376654
0.174641	0.382315	0.134537	0.191587	0.147577	0.171174	0.143606
0.174641	0.170295	0.248134	0.206774	0.181111	0.223607	0.392967
0.141419	0.224105	0.14136	0.154631	0.215407	0.223607	0.264157
0.252984	0.210105	0.14136	0.245176	0.565684	0.171174	0.264157
0.128062	0.428987	0.341759	0.19355	0.148512	0.177892	0.169754
0.252984	0.323099	0.450857	0.465315	0.239998	0.177892	0.169754
0.159026	0.428987	0.134537	0.123492	0.259659	0.205373	0.390343
0.128062	0.291207	0.159399	0.117688	0.258721	0.228033	0.744895
0.816552	0.170295	0.42358	0.206774	0.105679	0.214803	0.286706
0.511294	0.139392	0.248134	0.292026	0.346729	0.2608	0.296058
0.177131	0.384239	0.54506	0.323947	0.256477	0.351381	0.396056
0.182154	0.139392	0.25734	0.201647	0.468624	0.226764	0.317398
0.177131	0.240463	0.159399	0.558006	0.105679	0.292745	0.304046
0.511294	0.107702	0.22201	0.117688	0.125399	0.219673	0.286706
0.482161	0.22919	0.25734	0.394615	0.145604	0.19233	0.234359
0.230922	0.33941	0.288827	0.208042	0.125399	0.214803	0.21344
0.344834	0.107702	0.341247	0.292026	0.273658	0.461736	0.356577
0.230922	0.122566	0.341247	0.365839	0.258721	0.291203	0.234359
0.948686	0.378717	0.49592	0.146705	0.256477	0.230866	0.317735
0.344834	0.411203	0.22201	0.208042	0.447215	0.19233	0.156204
0.283236	0.122566	0.276794	0.146705	0.145604	0.334298	0.241867
0.191052	0.119999	0.288827	0.394615	0.533667	0.59347	0.156204
0.581116	0.371216	0.444871	0.218683	0.27623	0.320503	0.437599
0.283236	0.339719	0.113137	0.445919	0.147255	0.300195	0.314884
0.637181	0.189621	0.383694	0.218683	0.232284	0.338211	0.379528
0.191052	0.119999	0.276794	0.207917	0.16	0.3245	0.275713
0.164009	0.350143	0.137885	0.285973	0.3477	0.100001	0.296375
0.164009	0.236718	0.570022	0.359851	0.147255	0.100001	0.300665
0.347689	0.242467	0.113137	0.210485	0.156457	0.3245	0.189163
0.581116	0.378717	0.12649	0.422926	0.30945	0.257154	0.189163
0.347689	0.140158	0.12649	0.122564	0.257538	0.34059	0.234353
0.130595	0.190249	0.236571	0.207917	0.224899	0.257154	0.202759
0.130595	0.357234	0.267427	0.178886	0.353581	0.292279	0.227061
0.383899	0.271028	0.192353	0.122564	0.181108	0.570574	0.202759
0.863713	0.189621	0.267427	0.178886	0.156414	0.265819	0.126494
0.367697	0.772496	0.298142	0.162758	0.156414	0.267411	0.204881
0.877437	0.20623	0.158398	0.210485	0.340383	0.548803	0.126494
0.114116	0.188562	0.158398	0.504443	0.155241	0.319036	0.234353
0.255256	0.478933	0.236571	0.232966	0.156457	0.292279	0.533294
0.14422	0.20623		0.422926	0.299526	0.296676	0.271821
0.114116	0.400249		0.276106	0.177182	0.335677	0.469432
0.188681	0.140158		0.474349	0.144303	0.125788	0.234096
0.367697	1.13185		0.343461	0.144303	0.180124	0.160554
0.14422	1.02042		0.377241	0.13297	0.335677	0.160554
0.188681	0.227898		0.300382	0.13297	0.319036	0.209088
0.216149	0.202827		0.451219	0.240372	0.262428	0.206775
0.432665	0.307464		0.43936	0.240372	0.125788	0.209088
0.506359	0.188562		0.274062	0.177182	0.180124	0.309316
0.281599	0.232781		0.274062	0.21705	0.151004	0.223267
0.475627	0.3054		0.225343	0.241475	0.176133	0.128278
0.342345	0.933521		0.30098	0.309391	0.278878	0.558123
0.365955	0.58131		0.225343	0.241475	0.259055	0.145517
0.696977	0.300522		0.285032	0.219317	0.205616	0.193147
0.441915	0.308036		0.429904	0.219317	0.217151	0.178885
0.124051	0.227898		0.356899	0.800561	0.151004	0.128278
0.23427	0.329212		0.495239	0.244131	0.205616	0.178885
0.169968	0.307464		0.678822	0.379747	0.166667	0.118185
0.124051	0.851787		1.60987	0.244131	0.226547	0.145517
0.169968	0.452463		0.827313	0.208004	0.162342	0.169944
0.342666	0.367109		0.567072	0.208004	0.191019	0.118185
0.266259	0.308036		0.567072	0.145601	0.160274	0.260769
0.141421	0.329212		0.940211	0.212872	0.166667	0.169944
0.141421	0.27203		0.844038	0.137438	0.226547	0.694901
0.207077	0.278335		1.04891	0.137438	0.122566	0.259389
0.18367	0.671657		0.844038	0.24037	0.122566	0.387027
0.207077	0.471936		1.04891	0.265334	0.523138	0.343164
0.188045	0.27203		1.38937	0.170991	0.160274	0.236377
0.412335	0.300543		1.30138	0.126842	0.333019	0.141419
0.18367	0.750833		0.614295	0.126842	0.225281	0.246678
0.188045	0.988836		0.614295	0.24037	0.221358	0.185148
0.412335	0.484613		2.449	0.274632	0.279499	0.141419
0.340588	0.301479		1.00745	1.08797	0.1344	0.26157
0.172274	0.356248		1.07489	0.647863	0.32249	0.184172
0.172274	0.912108		0.472204	0.232131	0.1344	0.169515
0.947508	0.690882		0.472204	0.215233	0.286744	0.169515
0.249891	0.471936		0.517124	0.26675	0.228805	0.212567
0.249891	0.178986		0.388719	0.26675	0.334462	0.129004
0.158178	0.169966		0.360556	0.216937	0.264945	0.329336
0.158178	0.400695		0.388719	0.251043	0.201901	0.143913
0.308531	0.356248		0.360556	0.215233	0.397257	0.143913
0.329311	0.208274		0.281347	0.214993	0.158495	0.0894431
0.112071	0.169966		1.43206	0.181354	0.161247	0.329336
0.112071	0.476341		0.118288	0.214993	0.313107	0.206494
0.304573	0.194684		0.131989	0.278566	0.107706	0.0894431
0.186487	0.323373		0.126839	0.27729	0.158495	0.365326
0.273416	0.208274		0.126839	0.215985	0.264945	0.401224
0.273416	0.283004		0.118288	0.181354	0.689636	0.380467
0.186487	0.132966		0.131989	0.218683	0.135971	0.209376
0.304573	0.132966		0.197168	0.158239	0.107706	0.209376
0.534714	0.245861		0.236493	0.199999	0.289177	0.172979
0.418672	0.331945		0.141421	0.524975	0.246858	0.172979
0.22145	0.23816		0.236493	0.193792	0.466715	0.225932
0.22145	1.13185		0.141421	0.158239	0.141267	0.196174
0.107702	0.496467		0.446263	0.199999	0.246858	0.181353
0.107702	0.218809		0.301305	0.192714	0.194623	0.165186
0.282998	0.537595		0.171043	0.287444	0.153311	0.116621
0.362712	0.537595		0.171043	0.176509	0.203958	0.19241
0.344374	0.372285		0.172074	0.1494	0.253618	0.165186
0.200998	0.40672		0.70396	0.21052	0.16	0.193381
0.225584	0.40672		0.534657	0.1494	0.153311	0.116621
0.224101	0.218809		0.172074	0.359983	0.300665	0.375897
0.225584	0.256127		0.353902	0.240775	0.194623	0.196174
0.224101	0.19616		0.24998	0.150075	0.16	0.193381
0.121654	0.256127		0.157342	0.161245	0.203867	0.251045
0.333857	0.452548		0.241658	0.150075	0.167211	0.247478
0.65605	0.170295		0.157342	0.20988	0.480076	0.19241
0.121654	0.496789		0.201548	0.161245	0.232736	0.236472
0.174994	0.19616		0.155062	0.240775	0.199916	0.19241
0.174994	0.170295		0.182775	0.200577	0.133582	0.236472
0.232593	0.119999		0.41146	0.247384	0.167211	0.334995
0.556215	0.119999		0.21705	0.247384	0.277675	0.402493
0.345915	0.572713		0.155062	0.128065	0.133582	0.434613
0.161249	0.575885		0.182775	0.128065	0.142671	0.548844
0.161249	0.44905		0.134165	0.152563	0.307509	0.334995
0.345915	0.506598		0.182709	0.193791	0.232736	0.416792
0.215408	0.293352		0.107706	1.31066	0.199916	0.208807
0.444071	0.260461		0.107706	0.152563	0.250503	0.402493
0.215408	0.210949		0.190537	0.633747	0.16	0.344093
0.255889	0.126183		0.161552	0.29732	0.26926	0.359576
0.457482	0.254559		0.700039	0.126489	0.344816	0.208807
0.499244	0.126183		0.3032	0.126489	0.466075	0.14621
0.255889	0.260461		0.182709	0.200998	0.16	0.149932
0.395978	0.293352		0.41146	0.218498	0.114116	0.14621
0.861451	0.367417		0.725655	0.291266	0.258146	0.179137
0.167202	0.572713		0.134535	0.173249	0.680294	0.573973
0.393556	0.254559		0.126489	0.173249	0.444722	0.248909
0.133331	0.325853		0.0894448	0.190595	0.202429	0.26272
0.258049	0.248972		0.158467	0.245946	0.202429	0.210814
0.133331	0.267372		0.134535	0.181108	0.14522	0.133502
0.234853	0.176005		0.327089	0.104189	0.368919	0.290672
0.731643	0.176005		0.541336	0.177615	0.183819	0.58281
0.264763	0.248972		0.0894448	0.155567	0.183819	0.133502
0.264763	0.153304		0.333089	0.104189	0.14522	0.384708
0.303352	0.163435		0.253124	0.155567	0.114116	0.464377
0.283469	0.153304		0.126489	0.156913	0.24232	0.340588
0.561459	0.163435		0.389488	0.600333	0.286743	0.409878
0.371849	0.385528		0.132059	0.156913	0.165594	0.384708
0.798424	0.492221		0.205184	0.330607	0.212187	0.409878
0.283469	0.41231		0.541336	0.297695	0.214883	1.1559
0.371849	0.277704		0.27487	0.245946	0.386395	0.929637
0.237812	0.385528		0.515729	0.212732	0.263588	0.276259
0.237812	0.15921		0.134993	0.214994	0.202784	0.205604
0.184308	0.194646		0.418119	0.214994	0.181966	0.160556
0.258522	0.194646		0.21964	0.233429	0.154207	0.160556
0.184308	0.257252		0.205184	0.233429	0.222099	0.303292
0.474605	0.15921		0.27487	0.226478	0.275643	0.636554
0.292598	0.581431		0.4847	0.326328	0.214883	0.303292
0.495537	0.268327		0.16662	0.32866	0.122984	0.320156
0.196773	0.257252		0.323321	0.295854	0.491893	0.357102
0.130002	0.274306		0.218247	0.295854	0.154207	0.147633
0.192164	0.628013		0.304292	0.523451	0.122984	0.309879
0.130002	0.256125		0.417005	0.425205	0.223603	0.147633
0.292874	0.460107		0.218247	0.199626	0.140617	0.357102
0.127367	0.448398		0.16662	0.240113	0.202784	0.151177
0.376767	0.203089		0.323321	0.21582	0.11662	0.341504
0.127367	0.27203		1.08051	0.240113	0.11662	0.485337
0.376767	0.22988		0.421013	0.173032	0.140617	0.304122
0.379489	0.162207		0.639276	0.227542	0.105411	0.228037
0.161992	0.143913		0.217809	0.263397	0.187565	0.339408
0.161992	0.162207		0.4847	0.3985	0.146289	0.228037
0.4272	0.180901		0.197232	0.17088	0.143058	0.339408
0.134167	0.180901		0.217809	0.173032	0.178886	0.395602
0.101979	0.143913		0.197232	0.363698	0.105411	0.292061
0.134167	0.248394		0.653303	0.227542	0.143058	0.395602
0.604402	0.304137		0.305813	0.17088	0.315601	0.292061
0.101979	0.307425		0.163737	0.425205	0.165954	0.200002
0.228035	0.177138		0.322404	0.167718	0.187565	0.200002
0.284253	0.177138		0.153913	0.167718	0.146289	0.18
0.673572	0.307425		0.165977	0.219556	0.165954	0.164924
0.228035	0.237541		0.153913	0.362435	0.230224	0.244293
0.553172	0.286365		0.14289	0.141421	0.170879	0.164924
0.53038	0.237541		0.357212	0.141421	0.208071	0.605979
0.53038	0.128989		0.136531	0.200814	0.350455	0.542014
0.650811	0.128989		0.351181	0.152053	0.350455	0.13828
0.383802	0.350573		0.32704	0.247475	0.340272	0.132331
0.635294	0.218389		0.14289	0.113137	0.314815	0.132331
0.383802	0.166874		0.351181	0.223387	0.230224	0.19619
0.180023	0.218389		0.136531	0.116428	0.427284	0.19619
0.460434	0.421123		0.31652	0.298144	0.264409	0.155065
0.203061	0.471049		0.252984	0.164279	0.314815	0.155065
0.180023	0.166874		0.191754	0.164279	0.180278	0.124453
0.41144	0.490281		0.35674	0.209404	0.303587	0.124453
0.41144	0.350573		0.165746	0.113137	0.241936	0.212708
0.670302	0.663884		0.407699	0.182267	0.319247	0.313048
0.459249	0.126846		0.32704	0.147646	0.241936	0.179132
0.460434	0.126846		0.279692	0.141421	0.244787	0.116485
0.301186	0.217055		0.155792	0.152053	0.476238	0.116485
0.165874	0.217055		0.155792	0.116428	0.244787	0.152315
0.332134	0.392045		0.35654	0.182267	0.303587	0.286356
0.443221	0.360918		0.127814	0.262942	0.252984	0.198256
0.670302	0.326539		0.127814	0.262942	0.281498	0.280714
0.165874	0.271933		0.246724	0.164923	0.559466	0.198256
0.301186	0.1461		0.198885	0.147646	0.252984	0.266858
0.291203	0.1461		0.291205	0.196343	0.126493	0.280714
0.401992	0.26249		0.279692	0.234852	0.344465	0.189618
0.331371	0.59203		0.25923	0.141421	0.281498	0.19091
0.202454	0.260617		0.141421	0.246756	0.234096	0.189618
0.291203	0.352818		0.245611	0.246756	0.167946	0.2576
0.317842	0.271933		0.234376	0.196343	0.68469	0.173198
0.334675	0.373431		0.198885	0.211404	0.234096	0.173198
0.331371	0.283064		0.476497	0.193716	0.154129	0.41767
0.202454	0.293349		0.158169	0.1672	0.126493	0.2576
0.402562	0.26249		0.205004	0.122727	0.425206	0.329811
0.329972	0.137275		0.246724	0.228882	0.469237	0.269073
0.397603	0.260617		0.119999	0.178283	0.154129	0.113137
0.52548	0.137275		0.234376	0.325095	0.344465	0.329811
0.284764	0.281417		0.16991	0.125253	0.167946	0.113137
0.32249	0.203958		0.291205	0.178283	0.235436	0.326383
0.203039	0.398566		0.25923	0.164436	0.258379	0.25807
0.126839	0.143606		0.119999	0.122727	0.265495	0.640175
0.284764	0.320188		0.16991	0.125253	0.305941	0.25807
0.126839	0.143606		0.205004	0.252913	0.334995	0.248717
1.06442	0.378124		0.344794	0.193716	0.696933	0.248717
0.207631	0.180182		0.232562	0.208994	0.334995	0.366725
0.203039	0.164742		0.141363	0.281343	0.300666	0.190906
0.363743	0.164742		0.214088	0.101979	0.235436	0.190906
0.196977	0.180182		0.141421	0.101979	0.702096	0.463081
0.196977	0.240833		0.141421	0.179505	0.300666	0.366725
0.320624	0.177917		0.145602	0.211404	0.573488	0.16444
0.348824	0.489744		0.201157	0.1713	0.2506	0.292268
0.200001	0.33112		0.145602	0.212184	0.197989	0.223608
0.219999	0.368003		0.232562	0.204669	0.225769	0.74329
0.266272	0.280981		0.141363	0.204669	0.226002	0.16444
0.348824	0.280981		0.281442	0.1713	0.197989	0.421899
0.266272	0.228374		0.131531	0.242095	0.206668	0.378194
0.35609	0.395279		0.131531	0.572227	0.416174	0.169704
0.366119	0.368003		0.264858	0.299162	0.225769	0.254949
0.215174	0.228374		0.346278	0.20396	0.228036	0.32494
0.220809	0.335261		0.39339	0.280608	0.18	0.176674
0.204665	0.198885		0.39339	0.320157	0.206668	0.169707
0.220809	0.315103		0.354902	0.14851	0.212372	0.462362
0.204665	0.225123		0.201157	0.140456	0.259184	0.191949
0.189771	0.474646		0.346278	0.35932	0.173847	0.176674
0.189771	0.282419		0.145069	0.14851	0.388331	0.169707
0.579849	0.251242		0.145069	0.184484	0.13034	0.191949
0.481664	0.198885		0.367818	0.234189	0.13034	0.145628
0.599652	0.225123		0.264123	0.234189	0.173847	0.172045
0.304052	0.282419		0.158803	0.140456	0.195445	0.399383
0.400501	0.35283		0.175999	0.237704	0.195445	0.162239
0.304052	0.349284		0.158803	0.237704	0.317529	0.145628
0.400501	0.315314		0.200771	0.184484	0.377421	0.162239
0.286976	0.421525		0.369743	0.225486	1.13863	0.172045
0.286976	0.129999		0.573385	0.225486	1.16648	0.543894
0.326938	0.349284		0.55871	0.311139	0.238922	0.173074
0.326938	0.129999		0.21187	0.182913	0.211433	0.300166
0.476852	0.291204		0.264123	0.204326	0.368544	0.452009
0.822875	0.315314		0.121654	0.233233	0.238922	0.680548
0.501953	0.294509		0.121654	0.182913	0.370242	0.205803
0.584542	0.294507		0.616117	0.343642	0.0894448	0.362355
0.246756	0.291204		0.610037	0.233233	0.251203	0.220908
0.246756	0.128061		0.21187	0.26321	0.0894448	0.392254
0.197209	0.217644		0.681845	0.233714	0.220908	0.205803
0.197209	0.601334		0.175058	0.203094	0.370242	0.298144
0.141735	0.426787		0.194543	0.233714	0.220908	0.300166
0.141735	0.170296		0.158073	0.161245	0.211433	0.257961
0.412954	0.438017		0.542903	0.203094	0.234092	0.321755
0.412954	0.128061		0.301482	0.206773	0.346041	0.192116
0.297982	0.170296		0.158073	0.161245	0.223607	0.257961
0.297982	0.217644		0.163537	0.345254	0.356674	0.192116
0.574996	0.508023		0.280003	0.662421	0.158492	0.362355
0.436113	0.264196		0.163537	0.323109	0.32435	0.466034
0.905096	0.33941		0.388424	0.286354	0.319029	0.211893
0.315591	0.479928		0.275181	0.219994	0.158492	0.244666
0.435821	0.244119		0.211897	0.219994	0.242669	0.304104
0.315591	0.258361		0.370848	0.137434	0.280082	0.183378
0.32249	0.244119		0.211897	0.184811	0.280039	0.407064
0.32249	0.78344		0.275181	0.17493	0.466473	0.198361
0.435821	0.385144		0.392836	0.744317	0.30745	0.211893
0.246266	0.258361		0.392836	0.137434	0.242669	0.388975
0.644792	0.617008		0.341307	0.126489	0.280039	0.24759
0.246266	0.508023		0.341307	0.208274		0.298113
0.644792	0.383122		0.377845	0.170296		0.310484
0.909336	0.134164		0.452217	0.126489		0.183378
0.185352	0.246586		0.557715	0.211869		0.198361
0.351725	0.134164		0.242397	0.18439		0.171174
0.185352	0.303813		0.441854	0.189918		0.567253
1.50233	0.18439		0.270005	0.262717		0.171174
0.351725	0.617008		0.654801	0.19599		1.65604
0.250072	0.18439		0.134986	0.194165		0.831865
0.239366	0.219354		0.134986	0.189918		0.261347
0.649013	0.219354		0.173949	0.250648		0.345254
0.23439	0.172967		0.173949	0.383267		0.261347
0.189739	0.172967		0.270005	0.19599		0.432799
0.189739	0.37738		0.208696	0.262717		0.345254
0.23757	0.297157		0.160279	0.310483		0.217151
0.336518	0.297157		0.10469	0.369693		0.432799
0.336518	0.362707		0.10469	0.219997		0.217151
0.351966	0.316721		0.297071	0.219997		0.398943
0.384668	0.23142		0.375225	0.369693		0.507715
0.347634	0.37738		0.348752	0.207419		0.344092
0.177537	0.23142		0.405411	0.163979		0.216723
0.177537	0.248293		0.329829	0.222038		0.119999
0.351966	0.316721		0.297071	0.222512		0.216723
0.347634	0.223004		0.181176	0.222038		0.411826
0.204296	0.234096		0.584429	0.163979		0.119999
0.202298	0.172663		0.181176	0.18972		0.144222
0.202298	0.384854		0.405411	0.181999		0.169707
0.144016	0.13653		0.262636	0.181999		0.546769
0.144016	0.167631		0.299724	0.18972		0.432665
0.62888	0.189737		0.438774	0.27342		0.527466
0.370671	0.189737		0.359671	0.27342		0.432665
0.338923	0.13653		0.262636	0.260002		0.546769
0.228637	0.186932		0.299724	0.260002		0.141425
0.721111	0.223746		0.513316	0.46819		0.527466
0.744311	0.240656		0.317038	0.267998		0.141425
0.228637	0.11353		0.480415	0.267998		0.558175
0.576171	0.11353		0.317038	0.207856		0.100002
0.418821	0.210237		0.328952	0.207856		0.339547
0.306381	0.223604		0.140058	0.577236		0.100002
0.367151	0.223604		0.140058	0.18003		0.199999
0.368259	0.288445		0.119073	0.18003		0.335261
0.324351	0.123786		0.119073	0.206777		0.199999
0.368259	0.312509		0.33423	0.206777		0.335261
0.306381	0.264911		0.329467	0.240465		0.345961
0.204625	0.123786		0.286246	0.35302		0.234721
0.435253	0.143137		0.107702	0.422019		0.134164
0.116499	0.258244		0.113136	0.404863		0.177202
0.158043	0.143137		0.328952	0.287904		0.134164
0.116499	0.258244		0.107702	0.252981		0.255259
0.158043	0.670522		0.641766	0.212153		0.560442
0.368953	0.443068		0.176207	0.201316		0.61528
0.202436	0.228026		0.113138	0.134		0.255259
0.202436	0.323943		0.176207	0.134		0.49178
0.603691	0.600717		0.231099	0.40885		0.368134
0.126492	0.232962		0.302032	0.0894448		0.432668
0.126492	0.228026		0.348771	0.259242		0.483221
0.354703	0.235556		0.302032	0.159454		0.160139
0.354703	0.367814		0.16185	0.280712		0.160139
0.500098	0.679942		0.16185	0.0894448		0.454996
0.429364	0.175726		0.394462	0.191052		0.264009
0.67998	0.198212		0.328509	0.115087		0.455388
0.500098	0.175726		0.394462	0.345814		0.350569
0.569894	0.161245		0.289906	0.159454		0.387584
0.563602	0.161245		0.248664	0.441457		0.558766
0.340587	0.39315		0.289906	0.115087		0.255553
0.211697	0.197493		0.220228	0.280712		0.129661
0.340587	0.35451		0.214711	0.305407		0.255553
0.214133	0.206777		0.248664	0.345814		0.242985
0.434699	0.198212		0.214711	0.464276		0.129661
0.147648	0.197493		0.205953	0.129997		0.130431
0.214133	0.206777		0.205953	0.129997		0.179254
0.211697	0.242331		0.474911	0.380295		0.130431
0.147648	0.219426		1.08125	0.524976		0.412094
0.360556	0.219426		0.654801	0.180278		0.196978
0.423933	0.318237		0.357803	0.442065		0.196978
0.913382	0.413014		0.47772	0.198888		0.507373
0.554836	0.2174		0.218353	0.180278		0.12293
0.913382	0.2174		0.218353	0.380295		0.12293
0.537432	0.225813		0.737565	0.194163		0.101983
0.220323	0.264118		0.391987	0.224107		0.152314
0.220323	0.199999		0.114017	0.378115		0.101983
0.519025	0.225813		0.385045	0.454361		0.152314
0.321594	0.449048		0.114017	0.240834		0.322006
0.718419	0.579817		0.391987	0.81088		0.160801
0.297692	0.199999		0.120184	0.292299		0.259858
0.876084	0.404477		0.220101	0.347172		0.160801
0.519025	0.348907		0.304049	0.240834		0.338413
0.284605	0.579817		0.120184	0.292299		0.165597
0.436082	0.189615		0.214332	0.402933		0.165597
0.284605	0.302777		0.177247	0.347172		0.282841
0.229611	0.189615		0.231012	0.212772		0.264397
0.718419	0.302777		0.214332	0.176411		0.149345
0.229611	0.321093		0.254685	0.176411		0.149345
0.17964	0.264118		0.230298	0.244547		0.204605
0.17964	0.340588		0.177247	0.174368		0.230864
0.436082	0.273725		0.11363	0.164445		1.03697
0.365121	0.760263		0.230298	0.137664		0.247475
0.508562	0.175169		0.213985	0.364605		0.247475
0.207095	0.175169		0.11363	0.212772		0.134373
0.327227	0.233452		0.214672	0.164445		0.134373
0.172922	0.360556		0.214672	0.144217		0.287846
0.172922	0.360556		0.171209	0.15805		0.121654
0.318017	0.147276		0.161244	0.144217		0.121654
0.354739	0.147276		0.161244	0.137664		0.215403
0.328025	0.233452		0.171209	0.358081		0.220405
0.272029	0.471106		0.448902	0.274367		0.217153
0.308645	0.304943		0.220098	0.288344		0.496836
0.241662	0.505964		0.115084	0.15805		0.220405
0.308645	0.567453		0.338752	0.243754		0.156203
0.157939	0.487004		0.115084	0.288445		0.166127
0.133992	0.567453		0.243358	0.322492		0.173078
0.157939	0.255518		0.27785	0.249337		0.166127
0.241662	0.255518		0.33814	0.249337		0.156203
0.153478	0.20746		0.220098	0.288445		0.208807
0.133992	0.474336		0.146816	0.276068		0.286702
0.211346	0.240832		0.158465	0.323109		0.245128
0.187493	0.20746		0.320624	0.348163		0.176508
0.271619	0.358393		0.146816	0.162758		0.176508
0.187493	0.43111		0.396501	0.55606		0.236125
0.238233	0.224588		0.420071	0.188104		0.291206
0.137438	0.358393		0.446904	0.125786		0.236125
0.137438	0.43111		0.332571	0.188104		0.279999
0.211346	0.290688		0.304138	0.125786		0.15098
0.271619	0.290688		0.223272	0.368782		0.15098
0.238233	0.543575		0.184321	0.141265		0.348011
0.10032	0.565302		0.223272	0.141265		0.344385
0.10032	0.543575		0.221097	0.168259		0.154281
0.161245	0.343737		0.150624	0.189736		0.264656
0.161245	0.237495		0.150624	0.168259		0.296713
0.274724	0.604354		0.221097	0.141425		0.203197
0.617355	0.21974		0.230125	0.141425		0.580037
0.146366	0.237495		0.203595	0.190282		0.203197
0.146366	0.402562		0.35847	0.197875		0.122562
0.263059	0.164076		1.20518	0.321752		0.122562
0.281347	0.484327		0.199248	0.189736		0.554977
0.263059	0.21974		0.199248	0.173972		0.167702
0.34889	0.620741		0.318619	0.189502		0.334732
0.281347	0.196968		0.247022	0.471542		0.172045
0.200998	0.102956		0.386725	0.16637		0.562534
0.371213	0.102956		0.225877	0.276225		0.120003
0.194164	0.164076		0.225877	0.173972		0.172045
0.326377	0.245015		1.18136	0.112541		0.120003
0.176826	0.265707		0.190904	0.118701		0.143181
0.236004	0.222021		0.190904	0.112541		0.114698
0.176826	0.360859		0.215407	0.186074		0.329003
0.340482	0.196968		0.360408	0.16637		0.342669
0.218222	0.270186		0.215407	0.162758		0.114698
0.174993	0.256054		0.329944	0.118701		0.279999
0.142674	0.245015		0.324422	0.152314		0.319248
0.280731	0.25261		0.183285	0.152314		0.319248
0.150332	0.288835		0.324422	0.162758		0.164982
0.150332	0.28014		0.183285	0.133996		0.164982
0.132062	0.178608		0.211291	0.549751		0.27035
0.142674	0.324771		0.253225	0.133996		0.27035
0.282845	0.256054		0.208384	0.330153		0.291203
0.132062	0.242574		0.201526	0.170332		0.291203
0.156524	0.313914		0.166976	0.170332		0.220905
0.280731	0.169973		0.16132	0.180494		0.220905
0.164924	0.50403		0.272408	0.218373		0.190249
0.225584	0.354143		0.208384	0.163543		0.180886
0.280787	0.242574		0.272408	0.176028		0.454667
0.227468	0.25261		0.31757	0.163543		0.205914
0.225584	0.288835		0.147276	0.278406		0.180886
0.105475	0.178608		0.201526	0.402806		0.461973
0.105475	0.313914		0.16132	0.253052		0.120003
0.628013	0.18195		0.283403	0.176028		0.21185
0.775867	0.354143		0.114431	0.161245		0.377722
0.456547	0.203215		0.112543	0.205915		0.120003
0.184086	0.169973		0.112543	0.205915		0.21498
0.319961	0.28014		0.122567	0.136131		0.284597
0.319961	0.522477		0.114431	0.161245		0.377722
0.184086	0.143421		0.369791	0.349284		0.158501
0.169929	0.60574		0.132329	0.234858		0.183214
0.447256	0.146478		0.122567	0.277274		0.158501
0.235935	0.374354		0.369791	0.136131		0.171171
0.169929	0.316631		0.19496	0.206856		0.171171
0.260532	0.143421		0.19496	0.116616		0.232037
0.164924	0.180801		0.200997	0.174994		0.164436
0.235935	0.377524		0.241392	0.253052		0.170358
0.164924	0.180801		0.241392	0.116616		0.306663
0.140314	0.146478		0.11662	0.234858		0.232037
0.218683	0.594352		1.47883	0.174994		0.184391
0.212373	0.26981		0.11662	0.100002		0.184391
0.140314	0.26981		0.216334	0.27072		0.260194
0.212373	0.377524		0.249156	0.100002		0.259406
0.336215	0.677577		0.445311	0.287468		0.164436
0.281591	0.151799		0.216334	0.299628		0.0999992
0.281591	0.593485		0.773989	0.235952		0.0999992
0.143178	0.532019		0.192731	0.279999		0.288797
0.164924	0.151799		0.249156	0.384186		0.313849
0.143178			0.192731	0.11314		0.135975
0.216268			0.196071	0.430166		0.161246
0.164924			0.196071	0.11314		0.161246
0.38198			0.248034	0.235952		0.217151
0.225408			0.152171	0.246761		0.193132
0.225408			0.307194	0.299628		0.248394
0.371983			0.138726	0.134164		0.318777
0.217001			0.205805	0.382139		0.233238
0.217001			0.152171	0.230264		0.233238
0.492705			0.138726	0.169704		0.318777
0.160276			0.205805	0.134164		0.27203
0.371983			0.344892	0.219417		0.373926
0.338589			0.240301	0.447276		0.742376
0.160276			0.304781	0.169704		0.233711
0.230068			0.390506	0.27536		0.233711
0.432664			0.332968	0.210213		0.125788
0.550148			0.272612	0.185233		0.125788
0.297159			0.272612	0.230264		0.302685
0.166468			0.172001	0.382139		0.300833
0.209991			0.261889	0.240853		0.192671
0.288752			0.172001	0.200251		0.192671
0.213438			0.31664	0.210213		0.20561
0.186286			0.220807	0.185233		0.262633
0.166468			0.297258	0.27536		0.204073
0.186286			0.147649	0.210669		0.179505
0.249061			0.196596	0.240853		0.262633
0.19639			0.182238	0.210669		0.399061
0.277418			0.147649	0.242667		0.179505
0.249061			0.210323	0.200251		0.241566
0.22161			0.874872	0.278567		0.307513
0.190829			0.312807	0.294694		0.406022
0.156207			0.237185	0.259998		0.317238
0.19639			0.210237	0.259998		0.395507
0.21547			0.182238	0.273576		0.449109
0.143137			0.107992	0.205914		0.307513
0.190829			0.312592	0.244386		0.178884
0.22161			0.300281	0.181594		0.147109
0.143137			0.107992	0.179507		0.147109
0.190536			0.236266	0.342669		0.178884
0.340717			0.350789	0.181594		0.317238
0.325963			0.201841	0.179507		0.395507
0.201688			0.278917	0.10934		0.823704
0.156524			0.195264	0.162885		0.238026
0.397901			0.350789	0.153375		0.19363
0.164924			0.201841	0.10934		0.238026
0.156524			0.192172	0.153375		0.19363
0.201688			0.257337	0.244386		0.586942
0.454948			0.192172	0.321403		0.223091
0.370845			0.331594	0.321403		0.204026
0.65951			0.257337	0.178417		0.146697
0.203442			0.120737	0.204062		0.146697
0.435596			0.217781	0.186784		0.170262
0.203442			0.120737	0.133349		0.761196
0.642806			0.669493	0.170724		0.170262
0.278812			0.230519	0.238681		0.427965
0.435596			0.308853	0.238681		0.116716
0.278812			0.266434	0.219318		0.116716
0.307303			0.178884	0.237092		0.170356
0.910437			0.360695	0.220908		0.427965
0.739831			0.192001	0.133349		0.170356
0.322006			0.178884	0.312406		0.195163
0.401932			0.178999	0.220228		0.195163
0.202896			0.230519	0.183693		0.200554
0.322006			0.228035	0.203298		0.152315
0.25555			0.232725	0.238243		0.294144
0.202896			0.186666	0.183693		0.133502
0.241866			0.203962	0.261366		0.200554
0.241866			0.393563	0.293624		0.133502
0.255518			0.178999	0.20734		0.270179
0.178886			0.228035	0.156524		0.370013
0.178886			0.26045	0.209027		0.229956
1.13564			0.120831	0.219318		0.382098
0.42875			0.234211	0.12649		0.229956
0.158114			0.203962	0.204266		0.507134
0.263988			0.256122	0.156524		0.450919
0.158114			0.120831	0.221358		0.450919
0.225			0.641048	0.202345		0.380288
0.30594			0.250799	0.203298		0.380288
0.150967			0.482578	0.179508		0.14422
0.572712			0.26045	0.139999		0.14422
0.211712			0.160433	0.12649		0.135499
0.263988			0.642894	0.118135		0.135499
0.693133			0.160433	0.253422		0.145601
0.53873			0.212705	0.216273		0.220228
0.150967			0.259025	0.118135		0.145601
0.225			0.194479	0.253422		0.236128
0.272577			0.216254	0.170661		0.272032
0.553173			0.212705	0.171174		0.292743
0.30594			0.194479	0.125256		0.236128
0.161245			0.206156	0.170661		0.161246
0.272577			0.206156	0.161245		0.161246
0.139999			0.155001	0.14866		0.561428
0.139999			0.358109	0.143607		0.410364
0.358084			0.257018	0.199017		0.215408
0.232036			0.155001	0.222799		0.205912
0.351314			0.45277	0.320624		0.205912
0.322491			0.134372	0.0999985
0.358084			0.134372	0.179508
0.232036			0.257018	0.339891
0.213438			0.191024	0.221358
0.450156			0.358109	0.202345
0.120737			0.384738	0.0999985
0.493233			0.232562	0.108522
0.120737			0.660614	0.108522
0.387586			0.166429	0.158394
0.266719			0.150271	0.190262
0.640499			0.564625	0.125256
0.273869			0.454142	0.203521
0.512983			0.232562	0.1118
0.205357			0.665738	0.1118
0.205357			0.166429	0.149907
0.410744			0.150271	0.143607
0.310357			0.746492	0.205184
0.253421			0.243411	0.199017
0.466013			0.171401	0.177198
0.280714			0.488349	0.156916
0.253421			0.240123	0.190906
0.493964			0.400501	0.156719
0.487953			0.6152	0.238068
0.180846			0.136131	0.158394
0.180846			0.171401	0.222921
0.343638			0.36742	0.177198
0.343638			0.136131	0.156916
0.400499			0.325274	0.150335
0.524976			0.178886	0.16084
0.626393			0.36742	0.169421
0.524976			0.398386	0.18243
0.487031			0.21809	0.205184
0.487031			0.23731	0.326938
0.185777			0.181414	0.1344
0.264155			0.174486	0.243472
0.185777			0.174486	0.203521
0.199999			0.356307	0.160279
0.188043			0.310675	0.149907
0.177538			0.485958	0.134162
0.327051			0.422781	0.161245
0.188043			0.304703	0.454119
0.349502			0.116618	0.150335
0.177538			0.21809	0.0894448
0.176036			0.203962	0.196075
0.176036			0.181414	0.313052
0.232178			0.386988	0.0894448
0.347311			0.108525	0.16084
0.347311			0.273358	0.18243
0.164924			0.488349	0.322489
0.164924			0.108525	0.289386
0.349502			0.422781	0.164436
0.250798			0.341581	0.210789
0.17828			0.23731	0.171171
0.17828			0.152314	0.166797
0.224177			0.205912	0.164436
0.621238			0.391151	0.168259
0.224177			0.152314	0.187733
0.355043			0.493257	0.187733
0.398578			0.273358	0.193492
0.282842			0.205912	0.210237
0.282842			0.402432	0.222359
0.234852			0.507017	0.300665
0.429329			0.289925	0.168259
0.482953			0.66483	0.179503
0.234852			0.289925	0.193492
0.155156			0.372507	0.211744
0.155156			0.391688	0.182508
0.427201			0.14422	0.182508
0.498496			0.14422	0.231658
0.588777			0.295306	0.237105
0.44476			0.242876	0.280712
0.554617			0.695284	0.179503
0.971612			0.267591	0.284847
0.44476			0.242876	0.200998
0.787938			0.427354	0.216673
0.141014			0.344126	0.200998
0.190905			0.267591	0.198627
0.223329			0.373362	0.211744
0.141014			0.391688	0.300665
0.134715			0.427354	0.198627
0.562817			0.239347	0.231658
0.223329			0.239347	0.282773
0.134715				0.243193
0.27729				0.304629
0.243793				0.239352
0.27729				0.119999
0.243793				0.119999
0.223604				0.282773
0.223604				0.589675
0.501909				0.462242
0.233239				0.161247
0.488308				0.243515
0.480724				0.161247
0.233239				0.243515
0.279061				0.393462
0.387223				0.629903
0.279061				0.224915
0.661211				0.224915
0.350411				0.389783
0.425466				0.389783
0.405571				0.797604
0.188002				0.355634
0.498343				0.738241
0.387223				0.355634
0.279087				0.314845
0.123692				0.386006
0.230217				0.606031
0.123692				0.306117
0.15391				0.606031
0.224748				0.306117
0.611883				0.314845
0.15391				0.386006
0.224748				0.43735
0.293748				0.245082
				0.43735
				0.338853
				0.217818
				0.245082
				0.338853
				0.217818
				0.492904
				0.213367
				0.310538
				0.213367
				0.304506
				0.209341
				0.243607
				0.565687
				0.581424
				0.310538
				0.218378
				0.209341
				0.304506
				0.243607
				0.492904
				0.218378
				0.22438
				0.229133
				0.250625
				0.166093
				0.195811
				0.375738
				0.437065
				0.166093
				0.252921
				0.169722
				0.593688
				0.42778
				0.319727
				0.222434
				0.169722
				0.181874
				0.402007
				0.40851
				0.228357
				0.246971
				0.181874
				0.339998
				0.246971
				0.147635
				0.228357
				0.134989
				0.0984328
				0.0984328
				0.130384
				0.314898
				0.40851
				0.614087
				0.528728
				0.246497
				0.246497
				0.254574
				0.253455
				0.253455
				0.135975
				0.415665
				0.135975
				0.326513
				0.325405
				0.739922
				0.116428
				0.116428
				0.567714
				0.326513
				0.481091
				0.321548
				0.263668
				0.263668
				0.373291
				0.330552
				0.162153
				0.576031
				0.162153
				0.161335
				0.678619
				0.161335
				0.199387
				0.392448
				0.199387
				0.392448
				0.20549
				0.135851
				0.391972
				0.20549
				0.135851
				0.209404
				0.35225
				0.209404
				0.144221
				0.144221
				0.398625
				0.158682
				0.158682
				0.300665
				0.316228
				0.360633
				0.16458
				0.16458
				0.335552
				0.255518
				0.255518
				0.399145
				0.197993
				0.161244
				0.145085
				0.161244
				0.145085
				0.548499
				0.399145
				0.614871
				0.118698
				0.118698
				0.625317
				0.39202
				0.174875
				0.258378
				0.210613
				0.210613
				0.260738
				0.258378
				0.260738
				0.530102
				0.288712
				0.410912
				0.288712
				0.274007
				0.108663
				0.623176
				0.108663
				0.214341
				0.274007
				0.679153
				0.325262
				0.610288
				0.41958
				0.282252
				0.567294
				0.282252
				0.285232
				0.41958
				0.711322
				0.637981
				0.866604
				0.740527
				0.157428
				0.157428
				0.25898
				0.312431
				0.278787
				0.25898
				0.386724
				0.0847047
				0.233366
				0.0847047
				0.38807
				0.278787
				0.153911
				0.153911
				0.297693
				0.233366
				0.207978
				0.297693
				0.268457
				0.395112
				0.207978
				0.23242
				0.23242
				0.268457
				0.269257
				0.528014
