# Supplementary material for: Affinity-guided labeling reveals P2X7 nanoscale membrane redistribution during BV2 microglial activation
Source: eLife. 2026 Jan 9;14:RP106096. doi: 10.7554/eLife.106096 (PMC12788799; doi:10.7554/eLife.106096)
Supplement: Figure 5—figure supplement 3—source data 1. [file elife-106096-fig5-figsupp3-data1.xlsx]

## Sheet: Figure 5-figure supplement 3A
Panel A: Blink detection data for untreated BV2 cells
NT_ROI_1_61_stk1		NT_ROI_1_61_stk2		NT_ROI_2_126_stk1		NT_ROI_2_126_stk2		NT_ROI_3_81_stk1		NT_ROI_3_81_stk2
frame	localization	frame	localization	frame	localization	frame	localization	frame	localization	frame	localization
551	1	60	1	1	1	1121	1	804	1	69	1
552	1	61	1	2	1	1122	1	807	1	70	1
553	1	62	1	3	1	1124	1	1745	1	71	1
972	1	69	1	4	1	1641	1	1749	1	72	1
973	1	71	1	5	1			1752	1	73	1
975	1	72	1	6	1			1754	1	75	1
977	1	1571	1	7	1			1758	1	76	1
978	1	1572	1	8	1			1759	1	77	1
983	1	1573	1	9	1			1761	1	78	1
984	1	1575	1	10	1			1762	1	79	1
985	1	1576	1	11	1			1765	1	80	1
986	1	1577	1	12	1			1766	1	81	1
988	1	1578	1	13	1			1767	1	82	1
990	1	1579	1	14	1			1768	1	83	1
		1580	1	15	1			1769	1	834	1
		1581	1	16	1			1771	1	835	1
		1582	1	17	1			1772	1	836	1
		1583	1	18	1			1773	1	837	1
		1584	1	19	1			1774	1	838	1
		1585	1	20	1			1954	1	1219	1
		1586	1	22	1					1220	1
		1587	1	23	1					1221	1
		1588	1	24	1					1222	1
		1589	1	25	1					1223	1
		1590	1	26	1					1224	1
		1591	1	28	1					1225	1
		1592	1	29	1					1226	1
		1593	1	30	1					1227	1
		1595	1	31	1					1229	1
		1596	1	32	1					1230	1
		1597	1	33	1					1231	1
		1598	1	34	1					1232	1
		1599	1	35	1					1233	1
		1740	1	36	1					1234	1
		1741	1	37	1					1235	1
		1742	1	38	1					1236	1
		1743	1	39	1					1237	1
		1770	1	40	1					1238	1
		1771	1	41	1					1243	1
		1772	1	42	1					1244	1
		1773	1	44	1					1245	1
		1774	1	45	1					1246	1
		1775	1	48	1					1247	1
		1776	1	49	1					1248	1
		1777	1	50	1					1249	1
		1778	1	51	1					1251	1
		1779	1	52	1					1252	1
		1780	1	53	1					1253	1
		1781	1	55	1					1254	1
		1782	1	56	1					1256	1
				57	1					1257	1
				58	1					1258	1
				59	1					1259	1
				60	1					1260	1
				62	1
				63	1
				65	1
				66	1
				67	1
				68	1
				69	1
				70	1
				71	1
				72	1
				73	1
				74	1
				75	1
				76	1
				78	1
				79	1
				80	1
				82	1
				83	1
				84	1
				85	1
				86	1
				87	1
				88	1
				89	1
				90	1
				91	1
				92	1
				93	1
				94	1
				95	1
				96	1
				97	1
				98	1
				99	1
				101	1
				102	1
				103	1
				104	1
				105	1
				107	1
				108	1
				109	1
				110	1
				121	1
				122	1
				123	1
				124	1
				125	1
				126	1
				127	1
				128	1
				129	1
				130	1
				131	1
				132	1
				133	1
				134	1
				135	1
				136	1
				137	1
				139	1
				140	1
				141	1
				142	1
				143	1
				145	1
				146	1
				147	1
				148	1
				149	1
				150	1
				151	1
				152	1
				153	1
				154	1
				155	1
				156	1
				157	1
				158	1
				159	1
				160	1
				161	1
				162	1
				163	1
				164	1
				165	1
				166	1
				167	1
				169	1
				170	1
				172	1
				173	1
				174	1
				175	1
				176	1
				177	1
				178	1
				179	1
				180	1
				181	1
				182	1
				183	1
				184	1
				185	1
				186	1
				187	1
				188	1
				189	1
				190	1
				191	1
				192	1
				193	1
				194	1
				195	1
				196	1
				198	1
				199	1
				200	1
				201	1
				202	1
				203	1
				204	1
				1128	1
				1165	1
				1172	1
				1180	1
				1184	1
				1206	1
				1218	1
				1222	1
				1226	1
				1228	1
				1231	1
				1232	1
				1241	1
				1242	1
				1243	1
				1245	1
				1246	1
				1247	1
				1249	1
				1250	1
				1251	1
				1252	1
				1256	1
				1258	1
				1259	1
				1262	1
				1264	1
				1265	1
				1266	1
				1267	1
				1268	1
				1271	1
				1272	1
				1273	1
				1275	1
				1279	1
				1280	1
				1282	1
				1283	1
				1285	1
				1286	1

## Sheet: Figure 5-figure supplement 3B
Panel B: Blink detection data for LPS+ATP-treated BV2 cells
LPS_ATP_ROI_1_67_stk1		LPS_ATP_ROI_1_67_stk2		LPS_ATP_ROI_2_2199_stk1		LPS_ATP_ROI_2_2199_stk2		LPS_ATP_ROI_3_1013_stk1		LPS_ATP_ROI_3_1013_stk2		LPS_ATP_ROI_3_1013_stk3		LPS_ATP_ROI_4_113_stk1		LPS_ATP_ROI_4_113_stk7
frame	localization	frame	localization	frame	localization	frame	localization	frame	localization	frame	localization	frame	localization	frame	localization	frame	localization
1176	1	393	1	1	1	284	1	2	1	133	1	121	1	1527	1	748	1
1178	1	537	1	3	1	287	1	11	1	134	1	124	1	1528	1	749	1
		538	1	4	1	288	1	27	1	986	1	126	1	1530	1	751	1
				6	1	291	1	28	1	1450	1	127	1	1540	1	752	1
				7	1	292	1	29	1	1834	1	144	1	1541	1	754	1
				8	1	294	1	30	1			145	1	1542	1	756	1
				9	1	362	1	31	1			149	1			757	1
				14	1	363	1	32	1			150	1			763	1
				16	1	364	1	33	1			151	1			764	1
				17	1	365	1	34	1			153	1			765	1
				18	1	367	1	35	1			159	1			766	1
				19	1	368	1	36	1			160	1			767	1
				20	1	369	1	37	1			161	1			768	1
				21	1	370	1	38	1			162	1			769	1
				23	1	389	1	39	1			163	1			770	1
				24	1	487	1	40	1			164	1			987	1
				25	1	488	1	41	1			165	1			988	1
				26	1	490	1	42	1			166	1			990	1
				30	1	491	1	43	1			168	1			995	1
				32	1	492	1	44	1			169	1			1488	1
				73	1	493	1	45	1			170	1			1489	1
				74	1	494	1	46	1			171	1
				118	1	495	1	47	1			172	1
				120	1	496	1	48	1			173	1
				123	1	704	1	49	1			174	1
				124	1	705	1	50	1			175	1
				125	1	706	1	51	1			176	1
				149	1	707	1	52	1			177	1
				150	1	708	1	53	1			178	1
				151	1	709	1	54	1			179	1
				152	1	710	1	55	1			180	1
				153	1	711	1	56	1			181	1
				154	1	1024	1	57	1			182	1
				155	1	1026	1	58	1			183	1
				156	1	1264	1	59	1			184	1
				225	1	1282	1	60	1			185	1
				226	1	1286	1	61	1			186	1
				227	1	1287	1	62	1			187	1
				228	1	1290	1	63	1			188	1
				230	1	1292	1	64	1			189	1
				231	1	1386	1	65	1			190	1
				233	1	1392	1	66	1			191	1
				236	1	1396	1	67	1			192	1
				238	1			68	1			193	1
				251	1			69	1			194	1
				252	1			70	1			195	1
				255	1			71	1			196	1
				256	1			72	1			197	1
				257	1			73	1			198	1
				258	1			74	1			199	1
				259	1			75	1			200	1
				261	1			76	1			201	1
				266	1			77	1			202	1
				268	1			78	1			203	1
				269	1			79	1			204	1
				270	1			80	1			205	1
				271	1			81	1			206	1
				272	1			82	1			207	1
				273	1			83	1			208	1
				274	1			84	1			212	1
				279	1			85	1			218	1
				283	1			86	1			220	1
				284	1			87	1			271	1
				285	1			88	1			272	1
				286	1			89	1			273	1
				287	1			90	1			274	1
				288	1			91	1			275	1
				289	1			92	1			287	1
				290	1			93	1			288	1
				291	1			94	1			307	1
				610	1			95	1			323	1
				611	1			97	1			341	1
				613	1			99	1			343	1
				646	1			104	1			344	1
				740	1			106	1			349	1
				764	1			107	1			843	1
				1240	1			108	1			844	1
				1241	1			109	1			846	1
				1242	1			110	1			849	1
				1243	1			111	1			855	1
				1244	1			112	1			857	1
				1245	1			119	1			1600	1
				1246	1			141	1			1601	1
				1251	1			145	1			1607	1
				1252	1			146	1			1612	1
				1253	1			148	1			1884	1
				1254	1			149	1			1885	1
				1255	1			150	1			1886	1
				1256	1			166	1			1887	1
				1257	1			208	1			1891	1
				1258	1			301	1			1892	1
				1259	1			314	1			1893	1
				1260	1			315	1			1894	1
				1261	1			316	1			1895	1
				1262	1			318	1			1896	1
				1263	1			367	1			1897	1
				1264	1			369	1			1898	1
				1265	1			370	1			1901	1
				1266	1			372	1			1903	1
				1267	1			419	1			1904	1
				1268	1			425	1
				1269	1			426	1
				1270	1			428	1
				1303	1			458	1
				1304	1			504	1
				1305	1			527	1
				1306	1			529	1
				1307	1			726	1
				1308	1			730	1
				1309	1			731	1
				1310	1			732	1
				1311	1			734	1
				1312	1			735	1
				1313	1			736	1
				1314	1			737	1
				1315	1			738	1
				1316	1			739	1
				1317	1			740	1
				1319	1			775	1
				1321	1			788	1
				1322	1			801	1
				1333	1			802	1
				1334	1			803	1
				1335	1			804	1
				1336	1			805	1
				1337	1			838	1
				1338	1			839	1
				1350	1			841	1
				1353	1			843	1
				1354	1			844	1
				1363	1			1293	1
				1366	1			1313	1
				1369	1			1317	1
				1373	1			1318	1
				1374	1			1418	1
				1378	1			1420	1
				1379	1			1421	1
				1383	1			1423	1
				1386	1			1425	1
				1387	1			1428	1
				1389	1			1430	1
				1472	1			1431	1
				1840	1			1462	1
				1886	1			1463	1
				1931	1			1730	1
				1932	1			1732	1
				1933	1			1933	1
				1934	1			1937	1
