# Supplementary material for: Affinity-guided labeling reveals P2X7 nanoscale membrane redistribution during BV2 microglial activation
Source: eLife. 2026 Jan 9;14:RP106096. doi: 10.7554/eLife.106096 (PMC12788799; doi:10.7554/eLife.106096)
Supplement: Figure 5—figure supplement 4—source data 1. [file elife-106096-fig5-figsupp4-data1.xlsx]

## Sheet: Figure 5-figure supplement 4B
Panel B: Alexa 647 fluorescence (a.u.)
Untreated	LPS (1 µg/mL)	ATP (1 mM)	LPS+ATP	BzATP (300 µM)	LPS+BzATP	MßCD (15 mM)
1532.78	5439.22	0	17658	7248.96	16772.9	262.818
1353.77	3082.95	0	2282.36	2567.31	104276	656.439
579.344	7526.49	0	24773.7	24852.1	2631.88	1049.4
1260.67	3113.58	2999.42	8834.43	2443.15	70794.2	296.317
555.5	12514	0	555.096	2119.52	25815.6	1255.52
236.863	720.349	991.428	41840.1	1659.53	4315.06	618.588
3726.07	16900.9	4459.01	2905.42	18479.2	94732.8	696.674
1302.36	463.889	4172.83	62688.4	997.669	7104.33	406.234
152.067	2043.72	2499.19	28622.7	7704.08	34131.9	411.615
753.353	13931.8	216.394	115287	40164.5	2136.82	373.061
1013.53	10256.9	611.253	129319	5954.95	93764.1	479.303
3772.83	431.042	7050.52	43293.7	3933.4	80986.4	725.613
0	985.512	2155.85	57379.6	3433.17	416.436	313.346
177.774	5526.38	5967.52	8337.32	4696.87	2368.92	7618.01
363.276	5145.35	486.417	39190.4	825.758	10595.3	2192.88
432.931	310.701	3733.39	50406.8	2360.66	88683.4	2186.4
1068.98	1429.36	9354.96	6997.43	9492.32	98834.1	927.87
1568.37	3236.18	916.221	90141.7	7941.77	93264.3	154.478
166.517	68142.3	514.144	78881.5	2793.47	9345.76	507.825
3870.88	1921.3	9334.44	37123.8	5022.34	76302.8	163.455
507.238	12878.9	5447.35	277.111	356.969	3611.22	1047.94
767.516	7785.75	1804.64	1491.16	6172.44	18147.6	7319.58
402.82	10177.6	6696.35	98888.8	269.137	1570.22	1970.97
494.248	4379.61	2494.11	89146.7	1734.21	112371	478.56
904.821	2540.28	1114.3	50206.2	326.22	133951	1380.11
586.445	882.931	812.259	679.814	11561.5	92744.4	225.397
707.58	533.063	7902.34	43785.5	6930.63	50452.7	282.036
355.067	1112.6	6010.44	54927.9	5720.58	2778.1	870.175
690.837	254.636	921.694	995.05	1374.72	2686.16	861.237
505.74	8136.83	429.166	10691.2	1892.34	965.369	455.433
0	3111.9	688.661	2592.84	5289.82	1090.19	587.292
349.23	3606.53	616.817	125644	167.612	13283.8	1301.73
324.5	3026.96	3059.53	51699.7	240.863	291.509	2086.79
516.411	987.48	3055.3	64870.2	6861.54	1434.82	1009.53
225.541	1005.41	7251.57	30516.9	4176.05	867.322	1200.94
956.6	33377.7	431.915	9865.68	21594.7	90891.3	663.801
1217.57	77854.2	838.995	3887.13	1191.17	61792.1	2495.62
2045.11	9479.36	3754.35	34854.2	2145.78	793.327	2448.5
1183.86	12687.6	191.065	60280.9	1674.25	44115.7	174.634
536.346	8089.79	3712.95	7392.18	1201.29	1962.13	358.559
3387.19	1278.98	392.097	19790.5	2714.94	38629	423.954
1375.03	20966.8	1858.67	159455	4924.13	1585.46	2631.28
581.832	2012.11	438.026	10750.1	278.61	2029.53	2019.81
690.55	2089.49	2596.66	102208	2517.48	408.827	621.885
574.327	5187.47	2701.76	88630.8	6934.6	3614.1	3508.67
2065.59	13680	3240.92	79926.4	11853.4	51576.3	621.624
875.674	5095.08	9418.18	39931.1	522.222	60486.4	775.021
340.734	50919.3	2119.82	111724	19913.4	986.49	1223.24
889.237	4012.02	1873.92	45047	1279.3	802.695	3533.7
644.4	101600	1571.36	161101	37373.2	4891.73	707.971
0	35826.1	515.721	1390.34	1985.73	477.792	8031.04
1593.96	537.78	2385.87	10661.1	8357.16	1019.52	5821.09
206.127	18079.2	493.336	870.318	1195.85	1362.04	3806.95
2928.86	93754.8	2151.8	10515	1846.83	1617.85	1564.13
1009.26	422.13	171.612	130785	10270.1	2025.44	3846.27
0	25369.8	1181.15	3917.41	10569.2	41810.2	1923.49
1812.78	16823.4	1419.09	3631.33	1624.26	26856.1	4002.9
2233.4	66607	1250.13	72379.3	1087.73	777.939	8587.24
0	682.394	1705.78	47896.6	488.059	632.895	18314.3
0	4651.24	283.274	44002.3	4081.95	2052.52	504.216
1633.9	22858.6	3705.81	1769.99	1334.1	29449.7	16194.1
305.125	11956.5	376.175	2341.7	2642.96	4686.92	958.489
1694.24	56252.6	2481.16	612.895	552.242	82297.6	1567.16
354.194	3056.11	688.01	3312.67	3482.26	237.463	7162.09
261.437	55951.3	1974.5	737.47	1549.73	171316	20960.9
0	5770.97	2227.94	47153.7	660.726	24700.8	2927.98
0	4851.42	1291.98	2008.72	473.205	2388.76	384.592
902.71	21344.8	518.444	20439.8	4456.28	4915.47	3791.32
1352.87	14584.1	2350.7	43564.6	12813.2	140751	1041.67
1959.18	28675	1031.02	56620.6	774.004	96958.7	485.127
326.506	8943.57	982.32	44612.5	632.556	31985.8	1931.23
0	9456.33	496.593	120621	1185.52	69779.8	404.553
2911.98	20916	387.328	55256.4	229.866	1371.84	1036.34
1975.92	36843.5	1897.38	43126.1	394.077	0	1353.66
971.923	50480.8	3867.47	30147.1	710.199	9897.66	567.578
0	14143.7	475.655	11671.7	4853.93	13368.6	919.961
956.339	3124.59	625.729	49272.1	570.692	31923.6	180.563
148.601	104731	1048.26	56192.7	2713.98	16342.2	342.103
372.904	17772.6	490.6	44804.2	364.943	10887.9	954.124
155.051	96413.6	309.372	2860.89	222.557	17170.7	196.628
439.016	7944.26	4429.77	54551.6	6126.34	2009.63	985.994
148.211	16023.5	1039.51	110211	708.87	0	2345.58
	5201.7	0	62510.9	499.564	3234.74	869.471
	269.281	2051.17	1492.5	431.055	0	5582.46
	39602.3	183.26	1114.86	0	0	1057.6
	13372.3	573.559	7059.42	607.891	0	196.628
	9470.93	3595.16	98773.8	601.22	0	352.161
	15059	634.641	594.575	1373.44	0	536.959
	2216.64	4702.32	1092.55	654.472	544.255	438.847
	9191.58	1437.69	5019.31	0	0	2468.8
	7399.54	2504.06	4052.28	6714.99	307.848	338.168
	15911.8	15683.9	91014.1	0	13561.6	220.459
	9078.79	2934.14	949.772	0	0	682.368
	28739.9	201.71	7310.58	214.895	1043.08	173.514
	4395.72	1690.47	3437.92	27369.7	452.032	1157.27
	10681.6	4382.49	43619.5	308.864	0	1027.05
	21829.5	9386.3	32733.9	1722.02	16429.4	2395.93
	32763.5	757.079	15097.4	6563.71	40141.6	543.109
	8104.41	542.913	10240.1	2140.3	18971.8	436.983
	2526.04	246.232	36119.4	1325.06	704.974	1465.17
	16083.2	1922.14	49320.1	329.06	38567.5	3370.73
	7907.84	2924.29	54444.1	1512.54	192.628	285.515
	62983.7	9572.41	23646.6	0	222.348	1904.16
	143959	1279.73	22695.9	48638	611.592	2736.64
	6917.84	3951.12	62309.2	679.971	1733.65	6509.56
	42693	1405.27	47068.4	2565.04	0	2542.42
	32104.8	260.629	37227.7	969.838	5880.85	2761.54
	9208.89	5451.09	70175.5	822.487	12647.2	1198.31
	13552.6	2602.94	29807.3	381.491	3055.27	914.879
	36646.1	1132.04	61651.8	189.449	888.742	307.718
	15773.6	465.57	16594.1	415.224	9726.93	5752.84
	992.561	667.579	41433.6	7794.06	1552.13	7727.09
	40149.6	742.186	152156	4209.95	271.991	470.469
	36332.5	0	0	690.941	0	2955.19
	1621.4	993.825	46052.5	1094.46	24807.8	1084
	5217.68	3042.77	14507	1317.96	65773.9	229.423
	2960.55	625.507	0	1744.12	176.615	1856.21
	3030.82	13888.7	0	858.84	5932.87	3335.54
	0	433.062	12703	4579.93	15385.7	361.386
	0	916.391	2327.37	1109.51	1230.9	4380.6
	5121.58	374.676	1959.42	3178.85	0	1992.89
	16668.4	1988.37	0	807.581	13268.2	7078.52
	11107.7	12594	0	159.69	52240	296.89
	1158.82	1123.51	2792.33	312.643	16296.4	1154.78
	2556.9	1019.71	0	166.165	7898.93	9308.59
	3843.12	1452.84	0	0	0	4157.36
	4359.45	356.305	12935.6	1255.9	83941.7	150.269
	1672.18	820.012	9127.72	3795.9	0	5184.28
	2491.23	0	0	2601.76	6852.16	3301.28
	8871.96	9402.01	11832.2	2296.74	262.101	1072.86
	7772.58	0	12503.6	304.473	632.66	1214.81
	9635.6	4275.19	60798.5	1864.2	454.352	1771.99
	12803.2	1881.39	13602.7	210.935	384.292	2313.39
	2470.94	200.654	58377.5	1057.02	9902	2103.55
	26758.9	569.897	874.136	3114.02	0	2728.22
	56471.9	1703.89	0	4888.47	0	3703.35
	56177.5	1101.1	369.96	15390.6	362295	168.211
	4347.32	7630.14	1260.81	301.411	83181.7	3289.99
	75410.9	4268.29	3084.37	9026.76	4378.59	415.837
	850.227	2551.38	0	775.998	208.537	619.409
	9274.61	0	12614.6	1679.41	47160.7	2219.9
	274.154	4987.85	0	0	7421.86	11226.3
	2254.74	2326.53	1560.74	18013.9	46957.7	7871.59
	24699.8	1248.84	2898.4	0	19878.6	555.539
	40155	417.4	0	0	10127.8	4531.71
	384.787	428.162	0	0	2335.52	1608.47
	1707.63	994.841	340.565	0	118031	891.218
	3739	1760.68	1117.07	0	72921.4	314.584
	544.607	0	6258.64	16902.7	39222.5	2465.42
	4920.77	263.73	0	15834.2	34776.9	2811.04
	5485.48	1022.79	30017.5	0	59415.3	1039.56
	2567.75	3359.93	41429.7	18431.7	27209.4	895.244
	7424.05	1206	27968.8	7715.44	46078.6	947.466
	604.621	709.886	38924.8	6954.87	44028.8	160.784
	3707.65	2359.11	3051.04	0	23527.6	3108.86
	61815.3	2609.85	313.32	0	0	688.544
	3599.52	495.056	458.625	0	0	1496.65
	977.356	313.529	165042	473.101	56.4829	3716.52
	1374.89	1027.64	90376.5	9859.81	1664.36	31.0754
	2220.1	3775.75	2559.78	6988.28	1451.59	8.9904
	2318.7	682.303	3267.49	479.082	36926.3	16.4172
	547.408	1542.77	434.638	601.559	7599.47	129.318
	833.25	1753.29	34863.6	2232.8	3398.18	17.238
	571.083	1875.24	200.967	7128.18	3487.58	17.8504
	31834.2	11187.9	29698.8	5596.24	1311.15	39.8312
	3763.74	4687.4	5173.56	4533.65	1896.34	8.6776
	8870.09	3568.94	1996.31	2535.89	1862.49	23.844
	4386.75	2515.37	30140.5	5009.03	894.293	7.075
	4540.75	276.33	23284.5	2035.56	3469.08	523.108
	2525.1	3331.38	45815.2	5588.29	1455.79	241.802
	9043.23	931.805	56562.2	9438.52	300.551	918.84
	3798.62	1495.53	195247	5105.95	4207.46	1419.94
	3079.05	8399.9	170.843	3377.12	285.62	514.196
	42589.3	5648.44	914.932	4017.32	925.42	570.757
	1000.99	1058.84	3515.83	3612.79	1372.19	1335.28
	8899.23	4858.32	205.371	8660.76	137180	217.84
	1589.08	8038.34	180225	10379.2	330.702	917.433
	4843	22018.5	208.316	2479.96	3468.52	297.685
	1784.39	915.583	11254.9	2844.39	3948.12	343.054
	8973.44	3011.21	8077.36	10801.1	895.387	145.917
	3683.3	1080.64	3540.36	3708.43	294.519	2263.38
	9236.63	2602.06	1841.81	6529.15	2440.43	6024.68
	5465.98	3929.12	26287.9	4544.01	608.36	284.212
	10898	4547.62	6775.18	1139.43	62543.5	637.182
	32797.7	1709.08	35757.3	4524.47	322.089	431.511
	20628.3	3479.23	22560.8	3254.93	1228.68	3268.42
	15900.1	2712.65	802.995	2164.96	1013.4	6151.83
	13277.7	203.56	2984.17	1805.91	1186.94	983.024
	40644	5121.58	27154.1	23388.2	2480.11	1263.48
	20421.2	5043.95	18828.6	1886.35	206.478	823.295
	31000.9	1170.84	29618.4	19257.4	939.284	655.267
	99856.2	2501.42	26255.9	6222.06	770.434	456.124
	19704.1	16172.7	73682.2	15962.4	6895.71	347.783
	10816.1	2668.05	102284	8429.4	944.078	2206.82
	20618	4235.12	18899	3696.79	25862.8	392.279
	16347.7	631.24	65223	5950.18	42174.4	455.694
	10174.2	19259.4	223378	9245.75	0	1951.13
	64171.4	9823.96	1015.83	4244.95	24809.1	408.748
	18515.4	3972.28	44297	7159.11	222.778	835.894
	13686.2	1730.24	28111.3	17781.6	83935.9	196.368
	47470.5	3317.02	23214.8	3554.81	319.822	237.697
	52343.1	9594.14	278.453	10455.7	187554	414.781
	165117	3964.2	241.827	5515.87	56283.2	1137.54
	24924.7	12405.5	4486.36	4657.38	50517.9	474.938
	7117.09	3492.6	929.316	3597.13	5658.7	1020.68
	30500.8	4620.6	34329.1	6365.59	0	550.431
	111305	756.167	682.225	6566.67	0	1767.74
	31401.6	5879.18	1372.7	298.167	0	374.755
	2019.42	3283.03	32887	737.561	74800.4	157.084
	60320.6	15489.2	1060.37		1685.44	161.448
	60349.2	8345.46	548.881		1031.28	1772.06
	45966.8	7274.11	360.135		330.337	194.543
	16081.3	11270.2	1566.61		760.102	1292.51
	18647.6	11076	572.412		276.212	302.545
	1101.87	5387.27	221.084		4085.56	255.977
	26934	3675.13	19003.3		7792.21	12701.4
	17464.4	2798.37	84235.5		73554.9	2180.28
	7782.52	9043.81	20016.2		10023.8	1082.11
	19069	2457.64	38322.1		1221.02	7594.13
	10558.4	12659.3	41054.1		9542.23	730.473
	52496	17318.6	66322.5		9768.7	1040.2
	146343	1911.35	81971.3		3342.61	30377.4
	17669.4	6399	2159.37		119193	1581.27
	26722.1	30126.9	790.904		833.94	1428.37
	108009	6808.36	22471.1		2135.68	33970.4
	20407	12282.4	7323.09		69193.4	1185.96
	1098.53	9075.4	1434.47		43316.8	1401.8
	119673	3189.53	637.651		323.496	180.524
	22735.7	14027	194088		6708.29	1112.38
	13124.2	6706.05	9141.05		0	882.853
	85772	3183.64	13512.2		5915.64	238.726
	51237.4	6036.24	32467.4		222.674	263.847
	36288.8	5417.69	52776.9		10130.1	468.541
	615.8	1310.23	29473.1		14984.3	642.967
	36920.7	7135.01	224035		504.346	3035.34
	51452.7	4138.03	33204		100861	315.158
	27232.8	2039.68	93961.5		32679.7	395.784
	16461.3	1550.82	57818.2		35694.6	264.994
	23870.6	224.733	140468		14292.7	597.754
	58580.7	1510.81	85538.9		266800	407.901
	41458.1	4754.41	97109.7		46018.9	2242.91
	29820.4	5112.52	36983.1		33205.2	692.401
	45029	6963.36	64647.9		17844.2	287.092
	40220	1079.19	125615		8045.13	372.201
	10803.5	770.63	189433		7455.78	373.842
	78322	765.353	5827.6		2225.95	325.373
	43499.7	371.263	116856		12894.6	1689.5
	7060.29	178.048	2052.32		19256.4	4428.82
	66473.6	148.667	108107		130668	413.804
	4115.08	1251.8	18763.8		2373.71	333.321
	39147.3	1319.3	374.702		0	427.719
	16522.9	6083.93	388.188		72928.5	2060.97
	30199.2	2722.04	1674.23		23585.2	449.153
	14624.6	661.26	1779.58		114475	209.176
	6158.21	4331.54	56644.1		56976	758.473
	11641.8	1962.35	57731.7		142545	209.176
	22447.5	17920.9	151381		125755	185.084
	10199.9	10488.3	91953.2		13377.2	666.68
	9847.38	3996.54	45675		135029	3491.58
	25986.6	3085.46	61225		96801.4	315.379
	17161.2	4349.99	87309.2		107193	2581.69
	15646.4	3450.16	211629		189637	1702.34
	44115.6	4084.01	347318		201603	207.99
	24475	3876.94	52327.6		3518.1	997.695
	4340.61	1000.91	10636.9		76602.9	190.257
	15850.2	5722.03	16775.3		2847.35	10346.1
	16492.3	12799.3	164618		7178.62	14132.6
	9196.09	1651.55	226601		79334.5	874.618
	18112.6	6391.49	143946		182740	1722.53
	13797	4329.43	123527		1548.99	12304.1
	41314	1828.43	256432		122484	4140.97
	58548.6	1737.73	39990.7		49478.7	3855.34
	10720	8249.35	36694.5		135920	996.874
	163749	16527.9	94849.5		3895.6	3345.61
	13830.5	2625.5	77339		85917.5	150.699
	13214.6	4907.25	134894		6178.93	1107.27
	701.404	3209.62	120932		1758.28	3207.47
	270.87	10408.8	155410		124163	18630.6
	117468	4069.5	137491		110893	1644.65
	52175.6	5192.93	121887		189.775	3039.89
	7377.81	3964.84	169563		185374	2141.58
	13132.3	6316.43	77586.8		40242.7	904.729
	43076.5	2382.78	80926		37842	1737.03
	75517.5	13711.7	93842.7		2912.16	996.574
	62181.9	10369.4	61572.2		75379.3	794.252
	23702.4	14549.1	229171		113439	858.905
	65171.8	22154.5	151073		107442	6611.36
	74615	3688.99	104199		114912	1034.99
	42328.3	1911.13	1182.45		2228.85	453.309
	220709	531.669	149480		2069.94	600.034
	12800	5818.81			80371.6	1172.84
	41488.6	1357.32			1681.29	168.81
	23088.9	5947.84			3785.32	4491.7
	21548.5	2660.99			135372	2153.46
	28691.1	1297.59			170496	1529.51
	13747.5	5231.71			33015.5	1111.48
	55560	9755.55			2002.37	165.579
	62829.4	11808.1			48255.6	2516.79
	15236.9	1675.03			195740	560.464
	8210.75	4547.13			112654	874.853
	25484.9	8750.47			1251.22	1186.21
	86365.3				1345.65	813.718
	15309.6				11792.6	1130.69
					101763	1643.36
					130823	686.186
					172945	1360.19
					5078.07	413.778
					144804	1817.29
						2516.36
						500.046
						4450.5
						1488.29
						324.995
						918.397
						1472.41
						1168.62
						2051.99
						2817.82
						4411.41
						1278.62
						865.224
						895.973
						182.204
						759.789
						765.014
						2059.29
						365.347
						7905.14
						2436.37
						1212.53
						3049.72
						408.266
						1101.64
						2108.64
						2955.83
						207.169
						880.521
						4809.7
						701.026
						186.387
						181.931
						1034.59
						2556.51
						3880.21
						1994.37
						763.451
						4411.36
						2605.11
						3844.52
						4151.54
						6119.37
						1444.01
						3699.75
						5058.74
						3604.53
						1239.52
						3339.3
						2183.94
						4794.8
						1750.75
						8591.64
						7839.42
						8255.91
						1482.82
						5066.79
						1693.76
						3094.73
						488.215
						3847.13
						3418.5
						1377.67
						710.642
						6283.88
						4501.85
						1724.55
						1939.78
						355.445
						5828.9
						1788.38
						1282.4
						3789.19
						909.602
						893.276
						1129.48
						5675.91
						2822.87
						5570.19
						4761.46
						2744.29
						5565.93
						7962.28
						625.325
						550.47
						1171.16
						1998.09
						1267.5
						1671.41
						4259.71
						2011.94
						2545.69
						566.861
						1157.72
						1992.89
						12068.8
						3562.55
						8211.26
						3146.39
						2537.25
						3443.53
						2703.37
						4198.46
						4609.17
						2560.6
						3406.29
						1523.28
						2015.7
						5072.24
						1605.6
						1409.57
						4836.93
						628.113
						1354.14
						6601.23
						2146.74
						206.492
						1665.74
						1041.43
