# Supplementary material for: Affinity-guided labeling reveals P2X7 nanoscale membrane redistribution during BV2 microglial activation
Source: eLife. 2026 Jan 9;14:RP106096. doi: 10.7554/eLife.106096 (PMC12788799; doi:10.7554/eLife.106096)
Supplement: Figure 5—source data 1. [file elife-106096-fig5-data1.xlsx]

## Sheet: Figure 5B
Panel B: IL-1ß release (pg/mL)
Untreated	LPS (1 µg/mL)	ATP (1 mM)	LPS+ATP	BzATP (300 µM)	LPS+BzATP	MßCD (15 mM)
0.828299	1.58437	0.792818	2.08163	0.861313	2.03507	0.73406
0.754466	1.58797	0.906899	1.73658	0.892184	1.7446	0.666964
0.754466	1.5951	1.56595	1.97413	0.998869	2.11805	0.690403
0.73406	1.55072	1.43859	2.12211	0.921174	2.00128	0.712734
0.921174	0.749527	0.331612	1.41675	0.414284	1.62103	0.266983
0.754466	0.92584	0.219719	1.52772	0.377517	1.91221	0.21147
0.754466	0.593426	0.0613709	1.08027	0.402273	1.95752	0.243812
0.774029	0.680248	0.235887	1.62752	0.345085	1.87726	0.402273
0.331612	0.879893	0.0613709	1.39918	0.371167	1.94517	0.431867
0.266983	0.899056	0.695059	1.19217	0.834244	1.95583	0.690474
0.15946	0.875283	0.819341	1.15573	0.78251	1.92111	0.635235
0.266983	0.899056	1.01075	1.23792	0.888973	1.75258	0.706382
0.274513
0.177299
0.141078
0.177299
0.358266
0.358266
0.743454
0.690474
0.737065
0.685855
0.704134
0.730612

## Sheet: Figure 5C
Panel C: IL-1ß release inhibition (%)
LPS+ATP	(+)AZ10606120	(+)A740003	LPS+BzATP	(+)AZ10606120	(+)A740003
100	22.99	28.44	100	28.2	23.72
100	80.91	64.99	100	43.78	22.93
100	32.74	44.13	100	51.99	53.85
100	11.8	14.47	100	36.67	20.32
100	12.08	12.08	100	34.55	14.06
100	38.88	20.1	100	24.32	13.17

## Sheet: Figure 5E
Panel E: # locs/µm2
Untreated	LPS	ATP	LPS+ATP	BzATP	LPS+BzATP	MßCD
0.388	0.805	0.667	0.782	0.338	0.877	0.657
0.429	0.422	0.578	2.432	0.554	1.394	0.848
0.716	2.391	0.55	0.662	0.674	1.626	0.976
0.7	0.286	0.323	2.752	0.755	3.411	0.476
0.627	0.858	0.241	5.172	0.431	1.252	0.426
0.737	0.549	0.425	1.113	0.667	2.59	0.267
0.876	0.341	0.629	0.672	0.536	2.824	2.154
0.183	0.224	0.267	0.316	0.503	0.258	0.226
0.663	0.816	0.182	0.821	0.383	0.184	0.066
0.691	1.462	0.373	1.044	0.827	0.785	0.364
0.505	0.229	0.245	0.79	0.282	0.194	0.434
0.686	2.586	0.368	0.861	0.602	0.575	0.812
0.586	0.315	0.444	1.721		0.497	0.564
0.3	1.333	0.237	0.96		0.326	0.373
2.362	0.707	0.746	0.773		0.308	0.169
0.65	0.481	0.24	2.167			0.393
0.534	0.622	0.33				0.414
0.377	0.253	0.302				0.358
0.767	0.785	0.116				0.33
0.358	1.279	0.162				0.287
0.586						0.466
0.24						0.237
0.513						0.176
0.253
0.837
0.432
0.689
0.465
0.416
0.564
0.489
1.049
0.323
0.566
0.504
0.516
0.55
0.454
0.762
0.307

## Sheet: Figure 5F
Panel F: Relative frequency (fractions)										Inset: Percentage of Log area>-1.6
Bin Center	Untreated	LPS	ATP	LPS+ATP	BzATP	LPS+BzATP	MßCD			Untreated	LPS	ATP	LPS+ATP	BzATP	LPS+BzATP	MßCD
-2.4	0.418228	0.400415	0.416206	0.403155	0.402222	0.429495	0.411321			0.0775128	0.142116	0.0791897	0.189308	0.0992593	0.16947	0.101887
-2.2	0.143101	0.15249	0.154696	0.108677	0.16963	0.10608	0.133962
-2	0.241056	0.205394	0.233886	0.190184	0.214074	0.194049	0.233962
-1.8	0.120102	0.0995851	0.116022	0.108677	0.114815	0.100906	0.118868
-1.6	0.0519591	0.0549793	0.0441989	0.0666082	0.0555556	0.0452781	0.0575472
-1.4	0.0178876	0.0280083	0.0165746	0.0368098	0.0274074	0.0413972	0.0292453
-1.2	0.00425894	0.0197095	0.00552486	0.028922	0.0118519	0.0284605	0.0103774
-1	0.00170358	0.0114108	0.0110497	0.0131464	0.0037037	0.0194049	0.00283019
-0.8	0.000851789	0.0103734	0	0.0122699	0	0.0129366	0
-0.6	0	0.00622407	0.00184162	0.0105171	0.000740741	0.0103493	0.00188679
-0.4	0.000851789	0.00726141	0	0.00964067	0	0.00388098	0
-0.2	0	0.00103734	0	0.00262927	0	0.00388098	0
0	0	0.00103734	0	0.00438212	0	0.00129366	0
0.2	0	0.00103734	0	0.00262927	0	0.00258732	0
0.4	0	0	0	0.00175285	0	0	0
0.6	0	0.00103734	0	0	0	0	0

## Sheet: Figure 5G
Panel G: # of detections
Untreated	LPS	ATP	LPS+ATP	BzATP	LPS+BzATP	MßCD
39	97	27	1190	27	73	13
42	13	9	1578	70	8	116
94	9	36	10	41	10	32
245	15	40	33	28	18	1185
71	54	33	8	19	16	8
17	9	224	27	50	16	20
9	9	20	25	12	8	406
52	23	15	57	225	30	131
57	73	8	33	23	71	161
78	12	112	11	14	9	47
45	31	17	70	123	52	51
31	25	13	10	17	14	44
10	101	15	8	17	10	17
16	15	15	32	33	26	9
80	11	26	23	75	14	44
13	17	36	12	340	2183	11
10	54	22	10	13	21	8
105	43	69	213	71	22	10
9	12	49	13	77	63	12
62	50	31	315	35	20	31
72	21	11	19	111	105	83
42	34	14	8	54	27	53
16	36	72	15	14	311	8
70	15	26	53	43	135	38
9	267	13	42	31	13	112
36	14	14	14	95	14	20
219	60	22	10	23	15	14
25	170	13	37	13	130	57
10	16	105	10	52	14	15
21	13	10	9	9	76	487
95	111	22	16	15	38	17
50	22	28	223	9	66	15
22	25	70	32	23	10	76
25	180	14	1351	20	40	136
23	83	30	14	88	19	21
9	43	42	199	16	14	121
117	430	61	8	102	13	27
115	9	67	31	11	18	21
25	25	46	103	52	86	164
19	221	67	10	28	92	147
21	21	10	42	60	27	18
32	9	30	11	150	11	18
20	19	607	419	15	21	15
14	28	105	51	59	142	57
9	32	15	16	22	2022	80
353	155	66	54	48	31	14
54	58	32	8	22	10	79
159	10	10	88	36	64	714
168	31	49	11	66	18	12
91	66	8	742	20	12	14
15	55	1664	38	25	8	23
227	216	21	611	48	24	14
119	104	17	44	8	21	69
21	32	37	46	157	17	38
48	13	12	9	19	1978	13
33	21	20	8	41	67	189
15	23	187	8	29	9	11
289	53	34	83	101	719	86
11	39	10	56	25	234	14
51	11	81	12	36	18	8
39	62	9	32	52	11	14
31	48	8	50	65	8	35
109	57	133	17	221	8	143
28	163	93	10	67	33	18
43	14	65	17	8	119	20
88	55	21	17	71	17	80
36	39	22	20	20	10	65
31	40	58	40	47	8	156
58	4079	13	31	46	202	15
10	506	9	24	54	14	31
156	2740	180	149	25	12	91
209	9	493	58	26	172	54
10	8	52	21	89	23	123
26	12	34	2344	29	65	108
93	8	17	39	23	15	22
33	39	31	23	245	8	50
22	42	45	143	52	53	22
27	11	8	42	14	11	46
50	12	49	24	84	9	19
165	23	49	18	28	59	15
32	17	23	47	19	46	33
25	131	27	40	18	8	16
20	36	10	51	33	11	48
14	56	36	69	22	20	37
17	30	382	317	67	1068	11
112	12	30	36	156	14	254
55	53	16	52	26	21	30
36	124	27	23	109	63	99
140	21	17	30	61	18	28
9	13	45	302	27	29	22
15	15	31	8	8	18	20
28	300	37	10	24	27	71
24	311	14	74	59	10	8
14	20	971	14	16	16	42
46	43	59	9	9	193	60
98	37	57	8	49	9	8
39	42	14	64	259	26	27
9	61	12	18	28	3546	369
25	83	49	17	57	22	20
17	21	58	20	21	15	16
95	23	51	11	14	11	18
10	10	77	28	50	8	179
10	20	744	284	22	1073	90
15	309	217	8	84	22	12
34	9	14	30	14	41	94
43	51	32	60	56	1970	13
23	25	116	50	103	47	37
26	29	8	2590	37	8	44
11	23	18	8	49	17	17
34	12	39	18	33	163	14
9	16	13	8	29	29	17
9	5084	128	13	15	11	8
9	12	15	23	30	64	20
48	12	12	15	29	8	55
9	22	259	20	26	19	23
28	46	153	18	20	8	32
48	15	18	49	17	48	26
11	59	25	29	72	9	25
28	38	41	16	11	66	35
27	17	400	59	28	47	49
10	94	11	33	42	228	12
10	55	26	8	31	321	40
20	47	19	9	16	69	10
49	9	13	18	12	16	75
128	40	12	82	33	382	11
30	61	87	17	55	32	19
9	38	119	15	36	11	16
49	3284	40	45	24	23	294
15	138	26	9	129	16	13
8	45	82	11	8	139	522
56	48	13	14	19	84	62
8	89	8	17	8	749	40
82	50	23	133	12	9	75
13	35	9	1250	33	9	103
33	8	25	23	31	23	30
336	9	14	15	40	110	57
16	24	156	18	59	11	42
15	12	9	11	27	22	156
14	13	18	16	34	19	64
44	24	24	17	20	157	19
19	11	79	171	13	11	53
289	29	24	9742	8	8	69
12	27	163	147	17	12	20
47	50	10	16	22	773	123
19	12	15	31	44	218	16
75	25	29	8	18	373	8
11	23	18	8	8	17	12
12	17	151	8	56	17	45
18	14	20	249	44	74	203
28	10	173	35	13	161	23
16	67	9	39	49	11	138
65	23	159	9	20	9	16
90	8	41	15	100	104	12
33	9	21	21	16	53	29
55	168	27	12	28	26	13
100	16	19	148	70	26	87
26	38	10	82	11	17	34
10	30	25	8	62	147	23
42	513	13	12	23	21	13
144	11	76	40	13	60	8
32	8	86	30	13	9	23
80	67	19	17	14	75	147
9	170	30	23	68	39	202
64	123	9	39	58	12	237
20	10	14	11	14	28	31
52	21	110	40	148	981	53
13	37	11	40	12	12	34
22	21	80	97	20	506	33
43	1229	29	18	34	68	10
63	12	11	387	18	16	52
8	29	58	2272	20	199	22
14	8	13	30	17	252	47
21	51	26	9	31	565	13
87	9	25	44	8	17	26
54	200	138	12	46	15	24
77	35	75	146	39	57	146
15	683	1229	28	39	63	89
16	40	24	27	8	28	53
83	16	97	13	29	926	21
16	65	28	255	15	39	35
46	26	116	33	32	58	67
35	23	59	65	9	23	10
14	13	82	22	47	25	23
102	8	31	9	39	21	42
28	24	28	60	74	19	173
14	15	25	17	38	33	16
22	195	110	19	29	9	49
53	14	24	160	31	45	205
53	12	134	15	23	3277	9
34	39	48	44	51	9	22
26	24	66	12	9	58	66
21	31	9	82	25	18	68
62	21	24	33	27	60	39
25	27	8	16	15	8	12
13	156	46	42	23	12	29
15	18	176	418	35	738	13
43	16	77	31	49	14	13
46	50	33	14	23	27	18
57	34	11	25	45	9760	27
74	36	39	79	14	92	170
78	374	15	109	100	19	31
25	12	62	10	100	13	85
20	12	43	9	48	139	57
77	8	33	17	18	12	12
30	49	91	12	11	12	97
23	36	36	38	13	10	19
27	317	22	87	15	13	25
31	15	20	10	9	38	17
11	36	46	145	25	12	51
29	11	66	13	38	18	22
53	9	15	25	10	1773	12
12	19	52	894	29	587	15
15	25	228	20	24	12	25
10	10	93	8	34	44	44
39	19	12	20	29	10	9
15	23	81	8	11	20	10
212	10	18	31	30	12	36
19	35	38	28	281	991	22
71	182	30	978	35	16	36
15	47	50	2155	55	8	102
209	11	52	12	45	59	111
14	10	89	11	114	8	11
15	20	65	240	29	8	116
12	9	23	31	569	15	44
13	113	24	9	12	26	17
58	24	47	747	45	549	23
30	22	20	98	163	27	43
20	26	22	25	42	66	44
99	35	52	296	20	201	20
34	28	23	1372	46	18	97
23	3884	17	31	34	27	84
291	52	13	46	158	69	100
40	165	115	313	28	8	101
26	11	18	9	65	16	126
90	8	129	9	38	8	28
19	32	57	105	10	17	259
12	35	93	9	14	10	63
8	11	19	1068	278	8	20
52	36	9	234	397	24	21
36	46	14	49	76	11	51
66	25	51	35	23	8	22
49	12	198	89	41	21	231
12	11	19	141	117	12	26
19	38	9	88	19	57	24
11	29	26	44	51	36	12
19	29	45	85	26	33	16
49	258	42	10	108	16	122
10	8	161	33	53	9	26
14	11	55	10	305	10	29
15	59	72	68	45	27	23
20	12	35	252	37	12	9
10	21	8	9	44	19	90
80	8	34	190	29	11	181
30	10	9	9	11	17	38
38	8	89	14	24	187	43
22	14	217	42	25	64	50
20	9	32	41	139	11	17
50	488	44	127	55	114	30
20	11	10	17	33	198	10
35	9088	8	10	23	19	13
64	160	22	38	344	10	14
37	41	53	31	154	12	138
17	15	263	108	240	57	35
54	16	29	20	21	10	49
17	18	204	270	20	98	638
27	13	36	103	46	24	35
159	11	29	9	28	10	74
8	12	403	106	17	19	85
38	10	58	16	15	14	10
11	8	57	16	71	121	8
270	36	17	33	36	11	55
11	17	13	16	184	154	221
41	13	72	29	13	22	115
11	9	15	24	55	668	336
105	45	35	22	20	17	58
10	30	19	412	23	20	64
21	9	100	643	28	18	14
49	26	15	52	49	16409	55
62	10	108	71	37	309	36
101	15	140	69	37	22	38
27	26	56	8	52	11	44
10	483	18	16	19	15	65
10	9	10	43	13	12	21
14	9	31	547	17	173	9
17	8	35	21	144	39	72
16	25	23	296	14	55	69
21	14	993	58	165	16	174
48	1009	134	20	161	64	10
104	13	45	13	63	37	19
9	42	15	16	12	24	37
8	17	142	15	51	57	27
46	19	35	302	24	945	61
16	56	31	8	21	12	131
15	12	42	8	24	126	48
136	13	186	28	92	36	119
206	8	73	18	15	24	20
10	8	46	17	24	4851	132
15	1773	80	22	49	33	38
41	19	328	21	9	181	12
14	26	30	16	9	38	38
87	11	20	16	17	127	37
19	8	8	9	36	14	44
19	8	240	16	37	2161	17
40	10	48	61	903	15	125
27	10	14	14	158	720	39
9	22	45	103	25	24	412
118	8	32	37	121	12	97
22	31	14	16	11	10	8
115	16	12	41	73	101	23
97	13	17	154	168	50	19
24	58	119	64	22	47	10
25	11	40	8	24	77	104
9	37	10	27	45	21	10
39	11	33	280	33	75	24
95	25	50	82	90	16	46
24	13	17	346	16	27	11
55	49	11	9	15	220	226
36	46	35	14	112	17	11
15	12	12	9	10	10	9
48	55	180	136	200	14	35
44	13	66	30	151	59	52
30	29	11	15	12	86	27
58	28	10	8	374	9	20
65	22	11	437	8	69	22
144	17	35	34	29	10	165
42	45	851	260	21	34	9
12	18	15	231	12	30	25
35	8	21	9	145	42	35
75	17	29	35	96	49	261
21	80	196	391	236	29	19
34	9	35	64	75	13	26
18	21	493	65	10	87	36
27	10	17	30	81	684	144
26	17	23	71	91	13	43
11	10	10	98	54	189	9
9	9	16	27	18	80	12
15	29	21	10	22	14	8
41	60	11	121	99	59	16
32	9	16	10	101	22	34
133	41	25	42	13	50	45
8	13	8	713	29	29	31
45	12	24	60	24	49	135
55	16	22	117	9	312	108
9	99	218	19	39	9	14
33	29	21	15	56	64	49
303	9	12	18	77	28	46
16	27	32	245	312	22	26
19	19	40	13	10	31	118
15	15	51	9	15	11	15
24	26	17	13	55	8	37
46	9	18	8	75	1454	24
8	30	39	102	107	208	9
54	12	23	130	34	240	8
41	14	12	176	62	118	9
80	11	29	20	42	19	41
81	67	87	9	20	100	31
141	9	8	58	40	12	35
58	9	286	154	18	64	13
298	43	821	14	33	34	16
20	3325	63	30	37	8	29
92	9	10	11	47	40	369
38	36	127	42	120	9	34
51	9	16	8	517	32	68
11	11	69	13	102	69	453
45	24	35	8	345	625	286
12	933	14	19	108	10	260
71	21	22	26	35	61	36
28	17	28	29	137	34	92
112	17	89	9	111	207	362
10	34	59	25	11	50	278
60	22	126	28	23	1824	185
46	31	26	23	43	56	361
52	29	49	10	121	74	69
8	88	42	50	41	10	37
15	17	9	8	16	72	66
23	10	20	24	12	20	74
48	8	57	21	226	12	39
9	13	63	9	10	12	41
13	12	20	20	171	18	81
29	14	18	448	32	26	154
24	8	26	38	110	13	41
52	25	48	48	85	14	15
24	167	72	137	140	30	76
24	13	10	30	16	8419	83
61	13	145	15	12	89	135
33	17	36	16	9	44	97
84	28	58	51	68	19	14
23	16	14	10	214	48	20
10	28	22	356	37	34	16
18	10	30	9	13	348	8
27	58	12	18	12	22	11
11	14	151	71	82	42	224
18	24	26	10	29	12	57
19	8	8	14	51	40	25
12	24	32	28	66	13	36
60	81	18	378	246	238	78
47	17	33	555	31	76	24
70	28	88	53	33	22	33
30	64	24	15	78	1154	150
12	21	61	62	59	8	417
24	14	22	8	64	15	22
38	9	24	8	143	124	45
25	42	47	9	35	10	477
26	14	8	949	79	90	127
34	40	89	18	146	12	8
100	624	42	11918	38	13470	493
74	107	108	8	112	19	72
23	12	8	16	19	8	194
29	8	42	8	19	187	125
8	59	8	19	97	21	56
80	9	116	10	24	58	26
11	14	9	1399	15	33	20
24	15	13	2876	26	24	91
18	1095	30	39	69	66	53
152	23	50	84	15	16	333
18	9	13	10	407	26	188
26	8	22	44	130	18	76
31	39	9	15	55	184	11
21	14	19	18	316	93	48
16	67	40	9	611	33	18
47	8	18	10	18	55	68
49	12	28	10	19	19	51
64	8	19	50	12	8	18
114	13	15	12	23	21	47
46	17	117	8	326	10	191
151	81	20	17	13	10	190
26	40	58	82	25	28	16
53	1456	30	9	19	8	33
18	50	125	5257	75	82	47
28	30	84	67	33	11	244
17	18	13	16	16	11	72
22	15	40	12	88	23	24
9	15	264	25	44	26	8
86	180	17	9	86	24	192
28	9	17	12	73	8	90
51	197	49	9	48	58	63
22	21	9	10	70	31	8
26	16	121	64	17	13	182
8	12	22	18	33	26	10
49	20	27	20	13	47	34
60	9	17	319	24	25	65
19	11	24	19	101	277	26
82	19	24	17	22	18	13
14	8	42	9	27	10	1786
40	13	12	9	22	11802	519
16	26	51	18	35	70	34
12	13	9	44	126	18	41
45	137	56	2993	22	8	128
11	51	32	12	25	48	73
42	81	11	9	25	129	12
35	26	55	9	40	18	168
8	8	31	20	20	1376	24
16	155	19	149	55	14	19
33	67	118	35	159	12	273
9	117	24	63	111	10	51
10	9	17	1809	46	20	100
13	1664	39	14	23	14	18
50	14	21	23	26	25	50
15	14	9	8	14	40	17
20	14	22	24	27	9	13
46	80	15	9	10	82	129
64	117	11	19	216	38	31
12	10	16	1693	70	753	41
31	35	162	24	8	93	131
49	8	208	16	31	48	32
16	13	8	14	58	21	11
24	10	15	8	44	23	14
127	13	18	13	18	48	191
37	11	38	10	30	42	66
29	10	92	9	9	18	10
28	11	74	8	53	15	31
15	9	11	44	99	22	19
20	45	38	99	49	47	118
13	3955	41	12	20	12	87
60	232	53	8	28	44	447
30	12	44	15	40	10	14
34	51	18	13	16	401	27
20	12	27	62	109	10	264
21	24	13	13	30	30	8
91	10	90	1587	42	366	68
10	59	40	14	151	12	10
34	67	18	8	19	214	64
14	53	66	9	171	13	199
29	10	34	14	25	88	66
24	18	14	13	13	13	67
41	28	26	18	55	13	24
20	10	353	12	57	89	143
18	9	57	19	79	250	10
53	8	16	13	52	33	14
14	21	8	8	26	13	22
32	40	12	159	76	171	70
15	149	128	258	14	58	13
13	32	23	31	33	77	443
16	7418	9	27	16	10	30
13	61	264	8	18	11	93
75	29	100	98	190	313	14
15	43	37	8	37	29	20
60	59	35	79	36	34	90
14	10	20	8	22	55	22
18	104	47	10	55	69	58
15	1795	28	56	24	8	32
10	26	11	73	17	19	23
20	36	57	10	72	14	22
55	197	9	34	34	11	123
60	148	58	44	29	9	16
20	27	98	17	45	17	284
71	31	45	13	44	25	40
23	20	35	9	20	21	13
44	423	23	35	26	17	15
55	20	91	15	19	12	88
10	27	10	10	21	8	780
20	8	54	56	488	92	72
25	29	50	12	41	36	224
34	81	58	324	11	106	101
8	342	30	94	71	26	32
58	13	19	9	64	13	114
100	28	35	3201	31	25	517
107	11	21	10	134	40	252
34	108	31	107	11	19	88
94	10	54	20	59	20	22
67	8	36	10	10	17	475
21	9	57	8	47	56	28
27	527	83	33	14	37	115
122	28	24	106	39	29	25
20	39	8	23	99	49	24
30	42	46	9	28	17	41
113	38	41	17	34	25	85
15	118	17	9	64	515	56
18	57	22	16	128	24	116
142	18	64	64	11	8	52
10	16	54	8	97	13	369
43	73	131	538	49	10	37
20	271	14	102	9	40	17
297	10	15	14	428	11	186
18	29	19	15	514	32	31
9	65	127	8	103	242	33
29	63	41	11	28	17	13
20	22	15	8	25	23	59
17975	17	17	11	10	26	12
10	463	64	39	124	50	137
24	45	27	20	33	24	90
15	80	21	12	45	17	24
30	43	41	21	48	13	73
20	229		34	29	19	67
9	224		286	380	71	223
18	13		1212	18	22	63
22	70		11	31	82	27
8	452		42	89	52	91
15	74		19	26	73	15
264	91		9	27	14	62
30	9		31	24	15	46
20	60		13	10	119	43
10	1091		37	17	9	46
29	43		66	21	187	41
35	39		123	58	37	65
12	41		21	29	163	99
37	1382		27	14	39	150
97	32		8	35	16	10
86	279		12	42	30	36
190	334		25	19	56	13
43	260		8	28	32	27
16	129		153	44	51	11
11	143		40	49	8	63
21	9		12	54	31	10
93	10		55	178	23	42
11	38		52	82	47	11
14	53		35	12	29	14
64	78		24	21	36	87
411	759		8	24	206	58
64	12		19	375	16	55
41	10		36	133	265	20
59	22200		11	97	68	21
21	14		25	26	17	106
64	26		14	42	293	106
27	184		16	43	14	16
12	68		51	13	12	214
14	105		30	9	30	27
52	324		92	64	35	33
58	34		9	47	30	65
13	48		1468	20	118	89
11	37		152	10	333	166
86	19		12	139	34	148
10	55		286	31	99	122
223	13		10	26	20	33
18	14		18	23	35	8
46	2010		8	17	91	40
8	38		317	39	10	8
94	21		15	34	26	9
45	13		16	104	54	474
22	13		8	16	20	464
53	53		9	24	39	10
63	16		14	20	9	33
13	96		215	89	8	56
57	114		89	22	21	18
33	43		9	10	30	29
103	10		27	13	44	40
38	5622		12	18	108	23
11	123		941	13	595	20
10	49		22	46	50	95
10	4578		16	1047	75	12
78	19		16	18	23	13
46	8		18	15	9	104
11	23		57	52	8	29
19	25		693	52	8	16
25	46		35	219	24	10
91	71		13	231	8	61
33	26		551	15	478	99
9	19		9	23	49	34
25	74		33	80	22	107
10	22		26	11	83	17
36	35		10	13	25	11
24	9		12	106	8	19
28	13		26	28	18	31
49	22		9	11	652	30
52	100		13	15	89	20
23	63		14	9	12	21
200	44		21	8	161	175
8	43		9	572	125	15
14	31		13	22	22	83
16	39		11	70	62	14
19	23		11	8	9	10
9	37		9	26	11	19
35	23		17	35	26	8
27	25		16	27	395	13
45	74		212	58	8	74
22	35		55	11	9	28
36	113		19	78	58	25
9	13		99	27	12	50
10	9		9	70	12	46
18	31		9	18	49	90
19	34		11	59	16	26
35	51		17	34	24	18
22	15		17	73	23	19
8	10		12	56	29	12
44	313		27	145	14	81
42	15		10	18	14	8
15	67		141	32	13	60
44	55		13	214	424	40
15	108		8	10	13	10
45	22		11	67	12	152
20	106		23	19	22	15
18	12		17	19	121	14
73	32		19	86	26	23
40	69		16	9	218	39
18	41		15	43	37	27
152	70		14	17	38	33
17	52		510	32	26	14
11	36		395	12	396	23
22	35		8	31	11	48
91	49		13	159	153	11
126	19		2570	224	11	118
20	10		194	124	29	22
43	15		417	31	27	9
19	48		28	278	129	39
48	32		8	8	17	19
33	24		22	19	13	17
21	82		19	31	30	22
80	56		16	36	10	25
50	46		13	333	26	103
21	10		25	132	39	21
30	40		27	101	14	18
32	41		43	62	69	178
37	155		8	60	34	8
30	21		12	15	27	9
12	200		20	34	8	8
10	10		20	124	30	24
11	40		18	22	53	41
23	23		10	18	91	28
36	284		10	13	129	31
11	13		111	13	81	9
11	74		242	101	24	17
10	122		23	56	11	13
54	40		195	57	8	23
18	113		23	34	10	27
39	61		78	61	39	26
35	28		141	10	25	20
18	62		34	153	113	18
26	27		45	37	280	25
272	31		120	36	11	72
14	20		24	58	119	13
31	392		186	31	45	27
42	27		8	48	80	13
53	39		754	34	649	16
16	36		49	175	20	34
23	93		90	36	88	18
126	34		8	13	28	21
10	95		77	9	23	16
309	45		33	131	18	9
143	20		19	18	9	22
10	15		219	14	24	22
12	16		162	49	261	34
288	8		54	11	21	10
17	42		211	271	9	10
52	107		39	100	31	10
20	278		19	43	14	43
17	15		83	255	15	238
23	33		38	22	23	102
45	22		11	40	57	44
13	43		50	61	63	12
148	32		628	50	14	28
39	203		13	25	48	16
39	80		59	24	18	23
15	35		36	230	25	123
13	101		19	229	16	9
8	16		41	65	13	113
90	31		379	45	54	15
69	15		179	18	11	18
28	22		40	9	36	10
19	64		36	195	661	9
11	195		151	48	13	42
21	24		177	125	152	9
15	460		19	65	83	45
172	33		75	66	8	27
15	36		13	58	12	30
52	45		89	16	13	9
11	17		29	88	28	50
14	8		55	14	11	8
14	119		71	71	9	16
14	45		39	25	11	12
52	348		294	21	59	13
11	54		11	53	40	11
8	55		12	57	40	9
14	15		27	34	11	48
9	44		8	419	15	23
21	8		11	14	196	10
8	413		69	53	21	61
21	35		9	29	20	8
41	249		90	15	118	39
21	686		23	17	8	246
25	58		14	10	21	28
33	134		25	22	9	31
424	9		10	136	14	22
31	21		15	25	18	25
29	56		48	64	10	28
14	34		88	26	71	23
18	21		28	65	28	13
14	33		108	71	16	172
54	363		34	33	39	28
14	52		124	160	21	11
11	76		11	49	9	30
100	15		142	16	96	12
22	185		13	34	12	135
18	51		115	20	276	58
16	9		53	202	362	48
65	19		61	21	73	33
42	22		23	411	394	34
9	13		17538	154	8	9
67	36		17	58	123	56
45	26		49	63	21	9
142	22		11	32	316	13
35	19		10	12	45	110
10	123		39	13	10	35
14	23		55	21	66	59
38	11		51	18	11	13
38	295		75	45	45	32
123	71		92	17	21	36
87	69		75	30	12	47
47	31		31	13	28	42
12	76		81	9	154	17
43	85		33	40	97	153
35	48		376	19	11	59
20	37		36	10	298	17
53	5122		52	8	13	47
65	10		9	8	450	25
78	8		109	8	14	32
8	94		55	9	125	9
27	249		36	30	18	15
29	51		35	9	15	37
137	20		24	56	72	46
10	5823		22	37	24	88
9	9		120	37	45	74
26	17		114	58	8	25
63	93		37	9	14	62
9	36		39	42		32
106	40		8	34		354
71	23		1197	57		8
45	457		30	29		59
17	14		76	23		8
149	678		8	10		29
12	17		29	35		28
31	132		2685	43		11
659	116		22	9		20
313	415		8	21		14
30	13		49	33		555
176	147		114	148		13
175	13		29	737		42
33	57		10	609		205
9	17		32	15		10
60	1860		10	21		16
15	17		24	54		55
88	17		132	16		20
194	36		102	14		20
455	1354		76	24		14
44	24		14	42		16
84	33		29	16		19
15	10		8	59		11
52	104		30	36		62
35	8		32	11		15
105	132		97	126		11
28	48		9	139		17
75	29		32	27		10
26	26		156	45		8
96	62		5929	60		13
150	25		9	54		15
61	10		61	42		14
736	15		115	16		28
92	149		195	28		13
32	145		24	10		34
76	13		137	37		13
88	25		98	13		8
126	26		52	39		8
12	29		20	147		18
43	24		8	17		9
60	15		14	41		17
58	29		71	50		29
38	14		59	39		22
65	232		1542	39		10
136	35		28	12		11
40	23		18	14		55
21	14		10	8		17
25	14		13	29		21
76	28		15	16		23
17	9		129	31		24
49	1242		28	27		1230
12	298		8	39		28
42	156		23	70		16
67	140		8	26		106
49	46		13	9		86
11	28		71	18		21
8	58		60	412		66
58	107		44	60		9
11	64		13	98		16
15	10		9	10		23
40	64		27	31		35
13	37		11	10		13
29	8		536	88		15
61	64		174	30		16
23	14		38	104		35
57	163		9	18		41
76	99		11	71		12
16	20		75	763		14
15	26		17	21		15
160	75		17	34		35
49	15		143	48		70
160	54		8533	14		23
85	672		24	43		13
49	17		23	42		15
11	414		16	10		25
32	102		42	24		9
9	11		235	55		19
42	166		61	19		109
177	119		15	17		12
56	11311		13	13		23
237	8		22	25		9
21	246		625	70		15
377	13		8	22		8
72	22		29	12		16
33	10		34	80		41
20	9		12	22		107
26	45		13	60		39
10	2512		13	49		18
11	28		154	69		55
627	458		96	57		320
40	60		14	10		44
13	41		89	82		16
65	47		59	11		30
57	11		20	41		23
31	38		78	17		20
23	9		105	271		216
12	16		192	45		16
13	87		112	110		24
44	590		28	8		15
8	9		75	145		30
89	11		45	45		23
22	10		50	29		19
63	28		36	14		9
69	34		21	10		9
32	58		20	17		24
12	3596		205	23		53
12	29		79	94		29
352	24		14	47		20
43	84		60	47		10
11	9		8	477		22
13	102		87	14		22
26	24		13	22		21
23	15		121	71		28
17	9		47	82		19
8	857		17	9		21
16	8		16	111		24
57	45		10	72		35
52	14		43	17		14
47	79		66	79		30
227	22		252	10		56
13	45		4494	229		11
11	39		168	46		61
46	61		20	97		8
200	107		8	19		23
157	42		143	13		72
87	9		89	11		51
23	247		19	49		9
14	69		10	12		443
11	52		31	19		18
12	131		197	43		57
90	125		126	11		21
77	116		417	18		9
13	24		25	130		100
23	30		10	26		12
9	33		30	48		14
14	22		15	42		114
10	27		1749	107		143
50	1235		17	16		15
45	35		88	913		19
84	15		22	43		15
148	30		169	23		8
38	184		49	15		11
672	50		13	49		31
41	49		66	36		29
150	81		48	14		30
49	21		127	35		62
40	54		27	10		21
25	47		225	15		19
63	12		23	13		34
19	93		31	21		27
133	25		213	13		54
18	51		17	21		26
17	25		27	23		170
39	73		67	16		15
14	404		197	25		692
73	24		56	27		41
10	22		36	50		10
9	24		17	46		20
42	52		48	18		20
35	28		75	31		22
8	938		148	85		27
115	45		72	364		62
55	47		14	40		9
18	62		58	60		32
107	102		26	24		11
26	141		206	138		11
47	1599		127	34		96
2301	14		19	18		28
10	104		65	45		13
37	20		10	45		148
450	172		26	109		12
49	124		30	48		39
18	75		15	10		23
24	21		14	32		28
52	61		80	144		24
153	99		23	44		39
89	19		13	140		27
49	8		8	119		42
8	49		35	35		41
8	175		122	22		52
9	8		8	11		57
142	55		9	37		49
287	158		8	13		24
87	101		9	9		16
11	90		55	19		31
166	59		10776	26		205
24	121		8	34		12
23	25		34	76		11
210	90		50	93		19
13	21		17	64		235
9			11	8		44
107			95	15		39
667			14	11		30
16			52	67		8
42			25	14		11
336			41	79		25
27			38	48		25
380			18	10		17
150			16	596		15
28			30	24		8
10			50	66		28
36			1006	24		13
49			24	253		37
104			30	33		51
26			196	19		16
104			425	40		8
12			39	27		32
45			25	15		42
382			42	11		15
19			119	45		28
141			15	58		25
60			91	20		29
26			40	40		38
36			109	15		53
95			10	17		26
30			54	63		16
432			42	409		49
39			37	41		13
59			163	14		15
223			17424	13		23
19			19	28		121
96			33	12		66
8			46	41		73
32			25	10		12
125			49	14		21
11			146	64		40
23			127	16		15
14			14	104		55
28			34	21		58
130			179	22		18
20			314	41		9
204			45	22		2910
78			138	10		32
9			118	9		83
436			151	139		28
46			28	19		42
24			33	31		57
41			46	49		13
75			58	37		124
9			22	9		39
104			12	133		32
117			66	17		30
50			14	97		19
77			8	104		41
30			378	241		13
43			23	75		9
46			786	40		20
180			9	25		18
11			9	202		10
61			97	21		21
128			12	40		27
31			77	74		49
269			14	63		58
52			19	43		85
24			26	41		19
37			25	15		207
77			16	30		70
28			14	51		15
25			9	39		13
32			87	14		48
24			297	56		10
20			22	15		29
61			30	11		28
84			36	8		9
10			58	43		34
23			8	13		35
24			25588	34		30
40			9	75		13
10			3386	71		117
33			19	41		20
23			35	53		21
23			30	10		61
13			102	51		20
38			29	118		22
51			116	78		71
15			74	17		12
11			27	20		32
83			24	14		10
50			22	103		168
14			23	10		19
9			14	60		12
93			20	13		12
16			32	20		62
62			20	17		54
16			96	33		24
96			9	27		11
27			16	69		14
13			24	47
51			40	11
91			9	95
11			61	24
33			91	39
15			18	14
13			24	13
22			195	8
30			78	38
63			9	36
286			63	16
14			267	152
38			11139	8
50			10	20
39			16	62
13			138	23
199			132	30
54			37	65
10			11529	41
88			443	49
14			10	82
32			27006	20
50			34	50
128			30	20
62			49	211
71			53	19
19			16	69
10			11	8
23			23	100
66			31	52
37			237	1128
8			822	54
39			121	56
137			10	65
15			14	74
18			19	86
19			78	27
8			35	9
45			1361	18
46			42	26
28			8	174
66			21	38
33			9	13
117			21	8
27			14	9
87			8	27
10			178	27
63			8	8
10			17	13
45			27	24
17			39	37
8			84	10
64			14	40
13			34	116
22			10	35
24			72	54
37			4246	55
270			9	42
9			11	57
22			37	14
19			14067	192
25			31	20
22			9	29
19			66	94
13			38	39
94			2157	14
12			11	130
8			9	41
60			114	55
12			26	50
113			23	38
11			127	32
25			280	184
20			91	15
16			23	18
39			20	13
45			8	262
32			20	49
28			33	15
35			54	16
158			50	177
22				241
17				40
19				13
140				86
9				123
74				72
67				14
10				13
17				146
9				38
18				111
13				17
32				25
91				290
584				54
22				93
134				8
83				133
16				13
18				46
34				10
35				8
14				330
130				33
24				42
8				225
10				34
13				86
28				221
9				72
16				103
14				19
33				170
				73
				52
				266
				158
				34
				97
				167
				546
				169
				14
				120
				21
				28
				24
				50
				230
				13
				93
				12
				91
				52
				16
				79
				210
				628
				162
				33
				45
				151
				18
				1373
				15
				16
				53
				27
				91
				95
				33
				30
				382
				42
				226
				43
				10
				26
				23
				116
				8
				12
				10
				23
				35
				75
				101
				78
				68
				57
				246
				1093
				11
				41
				84
				9
				118
				129
				60
				10
				47
				8
				144
				104
				47
				96
				81
				48
				10
				117
				15
				8
				112
				9
				40
				19
				27
				24
				9
				50
				51
				83
				39
				12
				59
				608
				13
				12
				10
				142
				29
				61
				13
				11
				98
				263
				50
				220
				24
				10
				125
				124
				20
				20
				9
				28
				84
				18
				8
				11
				31
				133
				31
				196
				81
				92
				10
				779
				60
				118
				52
				152
				77
				125
				48
				22
				105
				10
				145
				110
				30
				13
				148
				13
				30
				20
				114
				8
				42
				143
				24
				158
				60
				41
				29
				63
				34
				284
				54
				390
				64
				368
				9
				36
				14
				39
				22
				15
				17
				34
				85
				82
				16
				19
				37
				34
				60
				12
				15

## Sheet: Figure 5I
Panel I: # of fluorophores/cluster
Untreated	LPS	ATP	LPS+ATP	BzATP	LPS+BzATP	MßCD
3.28571	0.592593	0.146341	1.76923	2	413.583	2.04878
1.57143	0.37037	1.95122	1.46154	1.12281	0.416667	0.731707
2.85714	0.555556	0.243902	4.61538	1.33333	0.583333	0.195122
4.54286	7.03704	0.926829	5.46154	0.175439	0.583333	0.195122
1.74286	2.7037	72.0488	0.230769	0.315789	12.9167	1.65854
2.94286	0.851852	1.02439	1.61538	1.57895	0.416667	0.682927
0.914286	0.333333	5.80488	7	1.68421	1.08333	0.243902
2.57143	0.592593	25.2195	0.230769	1.29825	173	0.536585
1.68571	1.33333	0.585366	0.461538	0.315789	131.917	0.878049
0.542857	0.444444	0.439024	0.692308	0.210526	1.83333	0.926829
1.94286	0.925926	0.390244	0.384615	6.73684	3.83333	8.82927
0.714286	0.814815	0.829268	3.38462	1.01754	0.666667	3.21951
1.82857	2.74074	11.8049	0.307692	4.45614	0.333333	0.195122
1.14286	24.4444	1.60976	13.0769	0.947368	2.16667	0.243902
17.0286	3.81481	1.90244	1.53846	0.666667	1.08333	0.439024
2.4	1.62963	0.634146	0.384615	0.736842	9.83333	0.439024
0.285714	4.74074	0.292683	0.230769	0.210526	0.25	0.487805
2.31429	3.92593	1.56098	0.384615	0.280702	0.333333	0.243902
3.68571	11.8519	0.780488	73.0769	2.21053	0.416667	0.341463
0.285714	1.07407	5.80488	0.230769	1.75439	0.25	15.122
0.342857	0.444444	0.536585	89.6923	0.491228	1.5	1.60976
0.8	0.518519	0.487805	1.15385	0.491228	2.25	1.56098
2.08571	0.222222	1.95122	1.84615	0.491228	5.16667	0.878049
0.885714	12.4815	4.97561	0.692308	6.70175	30.75	0.243902
0.0857143	1.96296	0.487805	0.230769	1.89474	1.16667	6.09756
0.228571	0.777778	0.634146	5.23077	2.73684	0.333333	0.634146
4.22857	5.7037	3.26829	0.461538	9.75439	0.5	0.682927
3.22857	1.44444	1.41463	6.38462	0.105263	0.416667	3.90244
0.114286	5.81481	0.292683	9.69231	1.78947	2.5	7.36585
0.0857143	15.5926	5.70732	0.307692	1.68421	20.5833	0.292683
0.657143	3.88889	0.146341	5.92308	3.4386	28.9167	0.487805
0.685714	17.8889	0.487805	0.538462	5.05263	0.416667	4.73171
2.62857	0.222222	0.829268	0.461538	0.982456	0.75	2.39024
0.6	17.6296	2.4878	2.23077	3.89474	9.33333	1.41463
1.42857	11.1481	4.78049	45.2308	0.105263	9.16667	0.146341
0.485714	0.37037	8.19512	1.76923	0.105263	0.833333	0.585366
1.48571	1.33333	0.390244	0.615385	0.385965	0.833333	0.439024
1.65714	0.111111	1.65854	1.76923	2.10526	0.25	3.17073
0.371429	0.296296	1.70732	1.69231	2.80702	0.333333	0.682927
0.342857	0.407407	6.34146	1	4.87719	7.5	108.146
0.514286	0.259259	0.390244	0.307692	0.315789	0.25	0.341463
1.14286	94.037	6.04878	6.69231	3.05263	1.83333	0.341463
1.05714	7.11111	0.926829	2.61538	0.596491	0.416667	1.26829
2.22857	0.444444	0.780488	0.923077	1.12281	4.25	0.341463
1.54286	0.148148	4.43902	1.30769	0.736842	0.583333	3.70732
0.685714	103.667	0.341463	0.461538	0.526316	1.66667	2.04878
3.51429	0.259259	0.292683	0.846154	2.10526	6	8.97561
0.8	0.259259	1.12195	15.5385	0.982456	0.5	2.58537
1.42857	1.14815	1.36585	10.2308	0.77193	0.416667	1.90244
0.914286	5.22222	12.0976	0.538462	8.42105	0.333333	0.146341
1.17143	1.77778	0.829268	0.384615	1.85965	0.75	0.390244
2.02857	1.03704	0.341463	23.3077	0.631579	0.416667	10
0.228571	1.85185	1.07317	2.30769	0.491228	0.333333	0.682927
0.114286	0.814815	4.87805	0.307692	6.38596	1.41667	0.243902
1.02857	0.296296	1.07317	6	0.280702	7.75	0.731707
0.2	1.03704	0.292683	0.307692	2.45614	87.8333	0.243902
3.22857	0.185185	1.21951	24.8462	1.26316	7.16667	0.146341
0.6	0.148148	2.29268	1.53846	1.29825	281.833	1.65854
0.257143	2.22222	0.682927	0.230769	0.421053	10.5833	3.7561
0.571429	4.2963	0.243902	0.461538	0.842105	0.583333	88.7805
1.25714	3.22222	1.80488	1.84615	13.5439	57.4167	0.341463
0.314286	0.148148	1.41463	0.538462	0.421053	0.75	1.60976
4.08571	0.888889	1.80488	0.615385	4.59649	5.25	2.63415
7.88571	0.518519	3.70732	2.92308	0.245614	1.41667	0.390244
1.6	0.555556	5.31707	0.230769	0.105263	25.5833	6
0.657143	10.8889	0.243902	0.230769	0.807018	2.75	1.41463
0.514286	0.296296	0.682927	1.07692	11.4386	1.66667	2.19512
1.25714	2.55556	0.439024	1.84615	2	0.583333	5.65854
0.342857	0.407407	2.43902	10.7692	2.21053	0.416667	0.390244
1.57143	0.333333	0.292683	2.53846	8.70175	1	4.92683
0.0857143	267.259	35.8537	1.15385	0.736842	0.25	2
0.571429	5.40741	0.195122	0.615385	0.315789	2.08333	0.780488
1.82857	5.18519	14.2439	1.07692	0.77193	26.75	3.21951
0.457143	22.037	0.195122	0.230769	0.385965	5.41667	0.97561
2.08571	0.62963	1.17073	4.84615	0.526316	0.5	0.243902
2.68571	6.03704	0.585366	0.769231	2.07018	0.583333	1.17073
1.74286	1.14815	0.292683	376.769	0.280702	0.25	0.341463
0.171429	3.07407	1.31707	1.07692	1.26316	0.5	3.56098
2.11429	10.8519	3.46341	2.23077	0.666667	0.25	0.487805
2.31429	65.8148	28.6829	4.69231	0.596491	0.583333	0.292683
0.342857	0.37037	1.21951	3.92308	8.87719	5.83333	0.634146
0.6	0.111111	0.97561	0.307692	0.280702	215.083	1.90244
5.85714	199	0.243902	0.307692	2.45614	2.75	3.31707
0.628571	1.48148	2.68293	8.07692	0.701754	0.416667	1.02439
0.942857	6.55556	0.292683	0.461538	0.210526	128.5	0.829268
1.2	0.148148	0.634146	1.38462	3.47368	1.41667	0.439024
2.08571	1.37037	0.195122	0.307692	5.78947	1.16667	4.2439
0.542857	3.62963	0.390244	12.8462	0.701754	1.75	1.41463
2.74286	6.92593	5.17073	33	0.77193	0.916667	0.731707
2.88571	0.222222	1.5122	0.923077	0.350877	26.25	56
0.542857	14.6667	0.243902	2.15385	5.01754	0.666667	0.829268
0.114286	0.851852	0.878049	0.692308	1.01754	1.58333	3.26829
0.628571	139.667	1.02439	28.8462	0.45614	1.41667	1.65854
1.57143	0.481481	1.02439	23.1538	1.12281	0.75	0.829268
0.8	0.111111	0.829268	18.4615	1.19298	3.5	1.17073
0.771429	0.407407	0.146341	22.7692	0.140351	1.58333	0.341463
0.0857143	13.1481	5.21951	1.46154	0.280702	0.833333	0.780488
0.514286	0.148148	4.92683	0.384615	2.21053	0.5	2.34146
1.37143	1.62963	0.341463	0.461538	0.210526	0.333333	2
0.314286	0.222222	0.634146	0.846154	1.15789	10.8333	0.292683
1.45714	1.40741	2	3.07692	6.73684	0.916667	20
3.51429	1.92593	1.46341	0.538462	1.61404	0.5	1.60976
1.17143	3.88889	0.926829	0.615385	0.561404	0.333333	0.829268
1.82857	0.666667	1.60976	0.307692	0.421053	4.16667	0.292683
1.02857	0.333333	0.585366	374	1.50877	36.6667	0.439024
0.657143	1	15.4146	2.30769	0.315789	0.333333	0.682927
1.11429	3.51852	2.63415	2.23077	0.526316	0.916667	0.195122
1.28571	0.814815	0.829268	0.307692	4.5614	8.66667	1.80488
0.2	2.22222	0.634146	52	1.22807	2.16667	6.19512
0.371429	0.222222	0.536585	0.692308	1.40351	0.916667	2.53659
0.0857143	13.9259	0.634146	3.84615	0.421053	0.583333	5.12195
1.2	0.444444	2.68293	1.30769	4.42105	0.25	0.97561
1.62857	4.88889	0.585366	5.38462	1.15789	1.91667	0.195122
0.285714	0.703704	0.243902	2.15385	0.175439	0.583333	0.634146
0.228571	0.481481	6.97561	203.385	3.54386	0.75	2.97561
0.2	0.888889	0.195122	2.61538	1.22807	77.8333	0.439024
14.3714	0.592593	1.60976	1	3.78947	16.25	1.07317
14.4857	0.851852	2.29268	3.84615	3.50877	1	1.46341
1.34286	0.777778	0.536585	6	1.29825	0.75	1.21951
2.45714	0.333333	7.7561	3.23077	4.94737	0.333333	0.536585
1.94286	64	0.439024	0.692308	0.701754	1.41667	0.585366
0.0857143	1.59259	0.878049	0.384615	0.842105	0.25	1.21951
0.914286	0.111111	1.60976	1.53846	0.210526	0.416667	2.14634
3.85714	0.444444	1.65854	1.92308	0.842105	0.583333	1.02439
2.62857	1	2	2.69231	0.210526	0.833333	3.56098
0.342857	0.925926	0.146341	0.230769	0.315789	0.833333	0.146341
0.457143	0.333333	1.17073	0.307692	0.210526	2.16667	1.41463
0.485714	0.296296	0.97561	1.53846	1.78947	0.416667	0.195122
0.257143	0.222222	0.146341	0.307692	3.89474	0.583333	0.926829
0.885714	8.88889	1.5122	0.230769	2.10526	24.4167	1.12195
0.542857	5.18519	0.878049	0.307692	0.701754	0.416667	0.146341
0.2	0.111111	0.829268	52.3077	0.245614	0.25	1.95122
0.6	0.407407	2.78049	0.846154	0.842105	1.91667	7.7561
0.2	5.81481	6.39024	0.461538	0.491228	0.416667	0.341463
0.171429	5.33333	0.146341	3.69231	1.01754	47.75	1.07317
0.771429	1.07407	1.65854	7.15385	3.54386	1	47.561
2.8	0.111111	2.14634	0.692308	0.210526	1.41667	1.70732
0.0857143	0.333333	0.292683	0.692308	0.175439	16.5	3.21951
0.542857	7.14815	1.36585	0.538462	1.82456	2.33333	1.46341
1.17143	0.148148	1.17073	2.07692	2.31579	0.25	2.43902
0.314286	5.14815	0.341463	0.230769	0.315789	0.5	4.34146
1.88571	1.55556	0.878049	0.307692	0.561404	3.08333	0.390244
0.228571	8.40741	16.6341	0.230769	1.01754	72.25	0.731707
1	2.40741	0.146341	0.615385	0.421053	44.9167	0.487805
0.742857	2.33333	0.536585	0.230769	0.350877	1.33333	0.195122
2.08571	4	1.5122	142.077	16.9123	14.5	7.90244
1.22857	8.33333	9.41463	9.15385	0.210526	1.5	2.68293
1.57143	0.37037	1.60976	2.23077	0.526316	2.75	0.536585
2.05714	1	0.243902	0.307692	1.19298	29.3333	1.46341
0.771429	0.111111	0.829268	20.8462	0.175439	8.5	1.7561
1.77143	0.518519	0.341463	0.461538	1.40351	4.66667	0.341463
4.6	0.111111	0.146341	5.38462	0.175439	0.416667	0.292683
0.6	0.148148	1.17073	0.615385	0.175439	0.583333	2.97561
1.14286	1.22222	0.878049	0.230769	0.105263	0.416667	2.63415
0.542857	1.11111	0.390244	14.7692	3.08772	0.25	0.292683
0.142857	2.22222	1.70732	0.461538	10.1053	4.58333	1.07317
0.342857	0.444444	1.95122	2.46154	11.1579	4.66667	0.195122
3.91429	0.185185	0.292683	0.692308	0.315789	0.75	0.341463
0.142857	4.74074	2.29268	0.846154	0.280702	0.333333	15.6585
0.657143	1.92593	0.390244	0.307692	30.4211	0.75	2.19512
6.91429	2.59259	2.19512	0.461538	4.70175	0.583333	0.585366
0.2	2.2963	0.878049	0.307692	0.736842	1.58333	1.56098
0.228571	0.62963	0.926829	0.230769	0.175439	16.9167	1.07317
0.628571	0.296296	0.536585	2.76923	0.421053	0.666667	0.146341
1.37143	0.148148	1.90244	0.230769	3.57895	3.16667	0.878049
0.457143	1.25926	1.12195	0.615385	1.22807	0.583333	9.02439
4.14286	8.92593	0.292683	0.692308	0.842105	213.333	2.73171
2.54286	1.11111	0.634146	0.230769	0.526316	0.416667	0.585366
0.0857143	1.37037	3.60976	0.307692	9.4386	0.833333	0.341463
0.6	0.111111	0.341463	1.92308	0.77193	0.333333	3.31707
4.77143	1.85185	0.926829	0.307692	0.77193	10.0833	0.487805
0.114286	0.703704	0.146341	0.615385	0.105263	2.25	0.146341
1.37143	5.85185	1.70732	0.769231	2.70175	0.25	3.21951
0.257143	0.111111	0.487805	0.384615	0.666667	1.75	1.56098
1.54286	0.777778	92.9756	21.6154	0.175439	1.41667	0.146341
0.285714	1.22222	9.31707	1.23077	2	0.25	0.195122
1	0.740741	1.95122	64.7692	1.4386	0.25	0.926829
0.571429	0.703704	0.292683	9.69231	0.315789	0.416667	3.80488
0.8	0.851852	1.12195	4	1.57895	0.583333	0.292683
0.171429	0.333333	0.926829	0.230769	0.105263	1.66667	7.36585
3.68571	0.111111	0.731707	0.923077	0.210526	7.58333	0.341463
3.34286	1.14815	1.12195	0.692308	0.140351	0.25	0.292683
0.714286	0.518519	0.487805	88.6923	3.26316	1	0.634146
4.4	0.814815	2.04878	0.461538	0.175439	1.16667	0.292683
3.22857	2.33333	1.90244	0.846154	0.421053	1.66667	0.682927
5.2	0.518519	0.585366	5.15385	7.08772	0.333333	0.487805
0.6	2.77778	0.634146	1.46154	2.98246	0.333333	0.243902
3.08571	0.111111	0.439024	0.307692	0.280702	0.666667	0.146341
0.228571	0.740741	2.04878	11.0769	1.85965	110.667	0.195122
10.6286	0.814815	0.585366	5	2.73684	0.25	30.2927
6.74286	0.555556	0.780488	1.15385	2.38596	0.833333	0.243902
0.2	0.814815	2.53659	23.4615	0.315789	1	0.195122
2.65714	0.259259	1.60976	3.46154	11.1579	1.16667	0.146341
0.714286	1.59259	1.21951	0.692308	0.105263	48.9167	7.02439
0.342857	0.333333	0.439024	0.230769	0.736842	111.917	0.195122
0.314286	30.037	0.731707	0.384615	0.807018	17.5	2.68293
1.65714	2.18519	2.34146	1.15385	9.82456	2.41667	2.2439
0.657143	1.88889	2.97561	14.3846	3.85965	0.75	0.292683
2.4	0.185185	1.5122	2	0.736842	3.16667	7.31707
4.45714	0.185185	0.243902	0.307692	2.49123	0.916667	2.58537
2.2	1.07407	2.53659	1.76923	3.01754	0.25	1.12195
1.45714	1.14815	0.292683	2.46154	2.21053	0.5	2.78049
10.3714	15.1852	0.146341	0.769231	1.22807	1.66667	5.31707
0.0857143	0.814815	1.12195	6.76923	0.210526	1.75	0.341463
3.6	0.333333	0.487805	0.461538	0.491228	0.25	0.292683
3.2	4.07407	3.36585	15.3846	0.140351	0.5	0.195122
0.657143	1.22222	4.53659	0.615385	0.736842	2	0.634146
0.114286	0.555556	0.926829	1.46154	0.315789	74.75	0.731707
0.142857	1.07407	1.17073	0.846154	0.280702	4.41667	1.65854
0.657143	0.333333	1.7561	1.76923	0.210526	0.333333	1.02439
0.0857143	0.333333	5.07317	0.230769	0.947368	0.416667	5.80488
2.57143	1.77778	0.341463	1.76923	0.45614	0.583333	5.46341
0.914286	0.814815	0.195122	0.461538	0.210526	0.25	4.97561
2.2	2.07407	0.243902	0.230769	20	2.16667	1.02439
0.571429	59.1481	0.341463	0.230769	0.350877	1	0.390244
1.25714	0.62963	0.682927	88.0769	2.98246	0.25	0.195122
1.25714	0.592593	1.85366	3.46154	6.21053	0.583333	0.195122
6.97143	6.88889	0.682927	1.30769	0.385965	7.58333	2.43902
0.657143	0.222222	0.292683	5.61538	2.35088	0.583333	3.7561
2.11429	0.148148	1.60976	0.307692	0.140351	3	7.31707
1.25714	0.518519	2.63415	0.230769	0.140351	1	1.7561
2.51429	0.148148	1.12195	0.384615	0.280702	7.08333	1.95122
1.42857	0.592593	0.487805	0.307692	0.140351	0.75	0.243902
0.228571	16.5926	0.731707	0.615385	0.421053	0.666667	1.02439
0.4	1.44444	0.439024	0.769231	0.350877	10.8333	7.31707
1.45714	0.407407	2.68293	37.2308	0.77193	26.25	0.195122
0.657143	0.962963	6.4878	1	6	0.416667	0.341463
5.02857	1.96296	1.46341	0.307692	0.631579	0.5	0.146341
1.31429	1.7037	2.73171	1	3.85965	0.75	2.34146
3.97143	5.07407	1.36585	40.8462	0.421053	1.08333	1.26829
3.6	1	0.243902	0.384615	0.140351	0.666667	0.780488
0.2	0.148148	0.195122	0.230769	0.982456	0.583333	0.439024
0.228571	0.407407	5.7561	13.8462	3.92982	3.83333	1.31707
2.14286	0.148148	0.682927	0.461538	0.947368	4.83333	0.536585
2	0.703704	3.36585	1.84615	0.140351	85.9167	0.195122
0.0857143	4.66667	0.243902	0.307692	0.175439	0.416667	0.243902
0.142857	0.111111	10.9268	3.84615	0.210526	0.416667	1.07317
0.228571	3.07407	0.195122	0.384615	1.08772	0.5	1.07317
0.257143	0.851852	0.341463	9.07692	0.105263	2.66667	1.65854
0.8	0.185185	0.390244	5.76923	1.61404	0.333333	0.292683
2.14286	0.185185	39.0244	0.307692	0.140351	2.41667	0.878049
0.4	3.51852	0.439024	3.15385	0.245614	4.91667	0.926829
1.51429	0.555556	25.9024	1.38462	0.105263	0.833333	0.243902
0.771429	0.259259	94.7805	0.615385	0.385965	4.08333	1.46341
0.142857	1.03704	3.17073	0.692308	0.280702	0.833333	0.146341
0.142857	0.111111	1.7561	300.385	0.245614	0.333333	1.17073
0.514286	1.03704	0.536585	0.230769	0.526316	0.5	4.78049
1.08571	7.11111	0.731707	0.230769	1.7193	2.83333	0.439024
0.4	0.407407	0.146341	0.769231	2.03509	1.91667	0.439024
5.82857	9.33333	0.341463	6.46154	0.877193	0.75	2.09756
0.628571	0.111111	2.19512	0.230769	0.315789	26.25	3.36585
1.88571	0.444444	0.390244	0.538462	0.210526	0.25	0.195122
0.0857143	0.148148	0.195122	1.23077	2.73684	1.91667	0.682927
2.37143	0.62963	1.12195	0.384615	0.315789	0.333333	20
20.5429	0.222222	0.146341	0.230769	0.701754	3.66667	0.634146
1.42857	13.6667	0.536585	1	0.140351	4.41667	0.439024
1.62857	0.111111	0.926829	2.07692	2.59649	12.8333	1.07317
0.657143	0.62963	1.36585	0.461538	0.842105	1.66667	0.292683
1.42857	1.74074	0.195122	11.3846	3.22807	0.583333	1.56098
1.54286	0.148148	0.487805	0.307692	0.105263	1.83333	3.21951
0.257143	0.185185	1.31707	0.692308	0.105263	3.83333	0.390244
1.74286	0.296296	0.243902	0.461538	0.245614	1.08333	4.34146
1.08571	0.407407	2.87805	0.538462	0.210526	0.5	0.195122
0.171429	0.851852	0.341463	1	0.526316	5.91667	6.4878
0.142857	1.18519	0.195122	25.8462	0.175439	1.33333	0.243902
0.742857	0.777778	1.46341	0.307692	0.45614	28.0833	0.292683
22.8	0.148148	1.17073	0.769231	0.140351	0.25	8.58537
0.571429	0.111111	1.21951	0.615385	0.807018	1.41667	0.195122
2.71429	0.518519	2.87805	9.38462	3.22807	2.16667	1.56098
0.714286	0.444444	7.26829	0.307692	0.210526	0.75	4.09756
0.542857	4.66667	0.878049	1.30769	0.350877	0.25	0.829268
0.542857	0.222222	0.292683	1.53846	1.29825	0.75	0.146341
2.37143	0.185185	0.439024	0.384615	0.526316	6.66667	1.5122
1.54286	0.62963	2.92683	0.307692	0.140351	2.75	0.243902
0.0857143	0.481481	0.146341	0.307692	0.421053	6.58333	0.146341
0.542857	0.111111	0.487805	1.53846	1.19298	1.83333	0.195122
0.0857143	0.148148	2.82927	1.46154	20.386	0.666667	1.12195
5.28571	0.592593	0.878049	4.23077	1.61404	4.5	0.195122
0.8	6.03704	1.02439	2.15385	0.140351	0.416667	0.195122
5.57143	2.7037	0.731707	0.615385	0.105263	2.25	0.390244
1.68571	1	3.07317	378.231	0.105263	7.33333	0.731707
1.68571	0.111111	0.682927	1.30769	1.05263	3.16667	1.12195
0.514286	0.259259	2.09756	0.384615	0.701754	1.66667	0.195122
0.485714	5.74074	0.341463	68.2308	0.140351	0.583333	4.58537
0.0857143	2.22222	0.243902	38.4615	6.49123	0.5	1.7561
0.571429	0.111111	1.07317	0.692308	1.96491	2.41667	0.195122
1.02857	1	0.341463	4.15385	0.315789	0.583333	1.90244
3.8	0.222222	0.487805	2.23077	0.245614	124.417	0.439024
5.82857	0.259259	1.60976	197.923	0.140351	0.416667	1.12195
0.942857	0.962963	0.731707	0.769231	7.96491	0.5	1.85366
4.05714	5.37037	17.2195	1	0.421053	7.25	0.146341
2.31429	3.18519	0.341463	0.384615	6.38596	0.5	0.731707
2.28571	0.518519	0.195122	1.07692	0.45614	1.5	3.02439
0.2	1.11111	0.829268	6.30769	3.15789	0.833333	1.21951
0.4	0.333333	1.17073	1.53846	0.631579	3.08333	2.04878
1.42857	0.185185	0.780488	0.692308	0.210526	34.75	0.146341
0.285714	0.740741	1.90244	1.61538	0.105263	10.1667	1.85366
0.285714	0.740741	0.195122	417.692	0.105263	0.583333	0.243902
0.4	0.148148	0.341463	0.384615	2.80702	0.583333	30.6341
3.31429	0.148148	0.926829	1.38462	0.140351	20.0833	1.7561
0.228571	1.14815	2.73171	0.230769	0.140351	0.25	0.195122
4.45714	0.111111	1.90244	0.538462	0.736842	0.75	0.195122
0.342857	0.962963	9.36585	1	4.59649	0.666667	13.0244
0.371429	0.148148	0.341463	1	0.105263	3.58333	21.8537
2.48571	0.259259	2.39024	4.53846	0.140351	4.75	1.70732
1.28571	0.592593	2.14634	0.230769	3.75439	0.25	10.7317
0.457143	0.296296	1.56098	7.38462	0.561404	4.91667	2.09756
3.28571	0.259259	1.07317	0.307692	0.105263	1.33333	1.41463
0.257143	0.111111	0.878049	0.538462	0.385965	0.416667	0.341463
1.11429	1.18519	1.12195	0.307692	1.12281	0.333333	4.34146
0.114286	6.96296	0.682927	0.230769	0.140351	0.25	0.390244
1.11429	0.296296	1.90244	293.846	0.666667	0.25	2
1.8	0.185185	0.243902	2	1.50877	0.25	1.5122
0.314286	0.111111	1.12195	8.23077	0.526316	2.75	1.07317
1.02857	0.185185	0.243902	0.538462	0.105263	1.75	18.6341
3.37143	0.481481	0.341463	0.307692	0.350877	2.08333	0.292683
0.228571	0.407407	2.19512	0.307692	0.736842	0.25	2.63415
0.485714	0.185185	0.195122	0.615385	1.57895	33.4167	1.31707
2.28571	0.111111	1.31707	3.53846	0.45614	0.5	3.12195
0.428571	0.185185	0.195122	1.38462	4.17544	6.33333	0.243902
0.2	11.5926	0.634146	6.76923	0.105263	1.75	1.46341
0.4	0.148148	0.926829	2.30769	0.315789	1.41667	9.31707
0.942857	0.851852	0.243902	3.53846	0.947368	0.333333	4.2439
0.771429	2.44444	0.341463	1.07692	0.45614	0.666667	1.26829
0.0857143	0.296296	0.341463	0.461538	0.315789	0.25	1.70732
2.02857	0.222222	1.80488	0.230769	0.596491	0.416667	0.829268
1.02857	0.333333	0.731707	0.923077	0.105263	20.6667	0.487805
1.62857	0.851852	0.878049	0.230769	0.631579	0.333333	1.36585
0.6	0.259259	0.292683	2.53846	0.877193	1.16667	7.56098
1.11429	0.62963	0.390244	7.53846	0.491228	0.25	0.146341
1.85714	2.18519	0.243902	1.15385	1.4386	1	0.536585
0.171429	0.62963	0.487805	0.538462	0.245614	1	0.292683
3.31429	0.148148	0.341463	0.307692	2.07018	23.8333	3.5122
0.542857	0.444444	1.21951	51.6923	1.15789	43.0833	3.5122
1.45714	0.185185	0.195122	1	0.210526	1.16667	0.146341
0.8	3.7037	5.7561	0.230769	2.77193	0.666667	1.41463
0.657143	0.111111	0.146341	8.23077	0.105263	0.5	3.70732
0.114286	0.185185	0.682927	4.15385	0.175439	12.75	7.02439
3.68571	0.148148	4.04878	4.69231	1.50877	16.4167	3.90244
0.885714	0.148148	0.926829	1.07692	0.280702	7	0.390244
0.114286	5.88889	1.41463	59.3846	0.596491	0.833333	0.146341
0.285714	0.555556	0.146341	27.8462	0.105263	1.41667	3.46341
29.3143	0.481481	0.926829	0.461538	0.105263	0.75	0.536585
0.428571	99.7407	0.97561	3.76923	0.175439	2.83333	1.80488
0.828571	0.666667	2.2439	30.7692	0.140351	0.25	1.5122
1.94286	0.148148	0.439024	8.15385	0.245614	0.583333	0.829268
1.08571	2.74074	0.341463	0.230769	0.701754	0.416667	0.292683
0.142857	1.25926	1.56098	0.846154	0.526316	0.416667	1.90244
5.08571	0.111111	0.292683	80.3077	1.82456	0.5	0.585366
1.4	0.111111	2.43902	2.38462	5.82456	0.333333	1.17073
0.685714	0.222222	0.341463	11.8462	0.280702	0.5	0.292683
0.4	0.111111	0.585366	4.76923	0.105263	0.583333	3.02439
0.0857143	1.85185	0.146341	0.307692	3.82456	0.5	0.487805
1.48571	0.148148	0.926829	0.384615	0.280702	7.75	5.7561
1.17143	0.518519	1.5122	0.384615	0.526316	2.25	3.36585
0.4	0.259259	0.634146	0.461538	0.947368	0.75	5.26829
1.54286	0.185185	0.243902	0.461538	0.210526	1.16667	2.68293
0.428571	0.444444	0.97561	0.538462	0.175439	4.25	0.585366
2.82857	0.111111	1.02439	12.5385	0.210526	10.8333	2
9.57143	0.444444	0.439024	1	1.82456	0.75	7.17073
0.485714	1.25926	0.390244	1.15385	0.105263	0.666667	0.585366
2.14286	0.185185	0.682927	0.538462	1.78947	0.25	0.195122
0.571429	2.18519	20.3415	0.230769	0.807018	0.583333	1.90244
0.771429	0.259259	2.73171	0.923077	2.03509	7.16667	1.56098
0.142857	0.592593	0.146341	38.1538	5.50877	0.416667	0.243902
0.771429	0.62963	1.46341	0.307692	0.105263	0.583333	21.8049
9.65714	0.740741	1.26829	340.231	0.210526	0.5	1.07317
0.114286	2.22222	7.90244	0.538462	0.105263	0.75	1.80488
2.65714	0.407407	1.36585	0.384615	0.315789	0.416667	1.90244
0.2	0.148148	0.243902	0.769231	0.385965	46.1667	14.4878
0.485714	0.333333	0.536585	173.077	0.105263	0.583333	0.146341
0.2	0.222222	0.634146	0.461538	1.54386	3.58333	0.146341
0.228571	0.222222	1.21951	0.846154	0.140351	0.333333	0.341463
0.714286	3.18519	0.829268	0.384615	0.280702	1.75	1.17073
0.485714	4.37037	0.682927	0.307692	1.05263	0.916667	1.65854
3.11429	159.296	1.36585	50.3077	0.175439	0.916667	0.390244
7.11429	1.92593	0.146341	21.0769	2.24561	1.33333	0.146341
3.97143	0.740741	1.21951	0.307692	5.85965	0.416667	0.390244
1.34286	0.148148	2.39024	3.53846	0.140351	0.833333	0.878049
1.28571	0.222222	0.780488	9.53846	0.491228	0.333333	1.46341
0.457143	0.148148	2.87805	4.46154	0.175439	0.833333	41.4634
4.11429	2.37037	1.5122	3.07692	0.701754	10.8333	0.243902
0.2	0.111111	0.390244	168.462	0.561404	2.66667	0.439024
1.42857	0.259259	0.682927	1.15385	0.140351	0.25	0.390244
1.42857	1.48148	1.56098	0.615385	0.105263	1.83333	1.26829
2.91429	0.333333	1.17073	4.84615	0.280702	0.416667	3.80488
0.4	1	7.56098	37.8462	0.105263	0.333333	0.634146
0.628571	0.148148	1.41463	2.76923	0.140351	1.16667	0.341463
0.285714	1.22222	0.536585	1.07692	0.245614	3.5	3.07317
0.0857143	72	1.36585	1.15385	0.45614	0.333333	2.29268
1.05714	0.111111	0.146341	2	0.175439	21.25	5.21951
0.114286	0.111111	3.90244	0.230769	0.45614	0.916667	0.390244
0.314286	0.148148	0.634146	7	0.105263	0.333333	0.829268
0.2	2.40741	0.146341	1.30769	0.140351	0.25	5.31707
0.2	1.25926	0.195122	0.230769	0.561404	0.833333	1.07317
0.4	1.59259	0.390244	0.692308	0.105263	5.41667	0.341463
4.74286	0.111111	0.195122	0.384615	0.175439	0.916667	3.60976
0.114286	0.111111	0.439024	0.307692	0.140351	0.25	3.31707
1.51429	0.518519	0.390244	0.461538	0.105263	1.5	0.682927
3.45714	0.259259	0.390244	0.307692	0.666667	0.583333	0.195122
0.4	0.148148	1.02439	7.53846	0.210526	0.5	4.2439
0.6	1	251.22	2.84615	0.140351	17.8333	0.487805
3.57143	0.296296	0.292683	0.461538	0.421053	0.75	0.292683
1.77143	0.37037	0.634146	0.538462	0.140351	0.333333	0.243902
0.628571	0.333333	0.634146	0.307692	0.105263	3.16667	0.195122
0.371429	0.111111	0.195122	0.307692	0.105263	10	0.780488
0.971429	0.259259	0.634146	0.307692	0.105263	0.416667	0.634146
13.0286	0.185185	0.634146	1.61538	0.105263	2.25	0.195122
0.685714	0.111111	0.634146	1	0.175439	67.8333	0.536585
0.285714	0.111111	0.829268	15.6923	0.175439	0.583333	3.07317
1.6	7.96296	0.487805	0.307692	0.105263	0.333333	0.195122
0.885714	0.111111	0.341463	0.923077	0.105263	6.75	6.29268
1.57143	0.666667	1.65854	2.23077	0.140351	0.416667	0.536585
0.285714	0.111111	0.195122	5.84615	0.105263	0.416667	0.341463
1.4	0.555556	9.60976	0.384615	0.140351	0.666667	1.90244
0.228571	0.148148	0.146341	6.76923	0.105263	0.5	0.536585
2.62857	5.66667	0.536585	0.923077	0.596491	0.333333	0.536585
0.771429	0.555556	1.70732	0.461538	0.105263	5	1.31707
0.342857	0.185185	0.146341	2.07692	0.105263	2.58333	0.97561
1.68571	3.14815	0.292683	4.69231	0.105263	0.833333	0.195122
0.942857	1.66667	1.46341	288.385	0.105263	143.333	0.682927
4.08571	0.814815	5.56098	0.230769	0.105263	0.583333	32.9756
0.971429	0.111111	0.146341	0.307692	0.140351	0.583333	2.14634
0.142857	1.07407	0.585366	1.38462	0.105263	2.08333	0.390244
11.8	0.222222	1.60976	0.384615	0.140351	0.333333	5.46341
1.05714	1.33333	0.585366	0.615385	0.105263	0.916667	0.195122
1.02857	0.148148	0.292683	1.92308	0.105263	0.333333	2.73171
0.514286	0.111111	0.585366	14.7692	0.105263	1	0.292683
0.0857143	0.148148	0.439024	0.538462	0.105263	0.416667	0.390244
2.02857	0.333333	0.878049	2.46154	0.105263	0.25	6.29268
0.2	0.222222	0.390244	0.692308	0.105263	7.25	5.31707
1.42857	0.259259	0.780488	6.15385	0.105263	2.25	1.90244
0.142857	0.703704	0.634146	0.692308		3.16667	0.585366
3.62857	0.185185	0.195122	13.0769	0.385965	0.333333	1.21951
0.571429	0.222222	0.97561	0.769231	1.05263	0.416667	0.292683
3.17143	0.111111	0.341463	0.923077	0.701754	0.333333	0.195122
0.228571	0.148148	0.829268	0.384615	1.19298	1.25	0.585366
0.314286	0.259259	2.58537	1.84615	1.01754	28.5	9.21951
0.171429	0.62963	1.17073	0.769231	0.280702	14.1667	1.17073
0.4	0.148148	0.878049	0.846154	1.26316	3.25	11.561
0.257143	0.111111	8.68293	0.230769	0.947368	6.5	1.21951
1.4	0.222222	0.243902	0.307692	0.105263	0.416667	4.43902
7.51429	0.148148	0.243902	2.61538	6.80702	0.5	0.390244
0.857143	0.37037	0.195122	6.15385	1.26316	0.5	0.536585
0.0857143	43.1852	0.146341	3.30769	3.75439	0.25	0.731707
0.428571	0.703704	0.195122	0.923077	2.59649	1.66667	2.87805
0.257143	0.444444	0.292683	1.84615	0.701754	1.25	1.70732
0.257143	0.407407	0.487805	0.384615	0.210526	0.25	1.17073
1.02857	0.407407	0.146341	1.46154	1.57895	0.5	0.634146
2	0.37037	0.146341	8.30769	1.82456	0.5	0.146341
0.742857	0.222222	0.390244	0.384615	1.40351	0.416667	1.56098
0.171429	2	0.536585	0.615385	1.05263	2.58333	10.2439
0.114286	0.185185	0.292683	0.692308	2.87719	14.1667	0.536585
0.171429	0.481481	2	0.230769	0.982456	0.5	2.04878
0.457143	0.444444	0.341463	1	0.315789	0.666667	0.97561
17.6	0.222222	1.70732	1.61538	2.98246	16.3333	0.243902
0.0857143	0.185185	0.780488	5.15385	8.5614	3.58333	1.21951
1.08571	0.111111	0.292683	1.61538	4.24561	2	4.43902
0.514286	0.259259	0.829268	0.615385	0.526316	0.416667	3.60976
0.2	0.333333	0.97561	0.692308	0.45614	0.333333	0.341463
0.0857143	0.296296	3.56098	1.61538	0.842105	6.33333	0.195122
0.142857	0.555556	0.292683	0.384615	1.05263	0.583333	16.2439
1.17143	0.259259	0.829268	0.384615	0.912281	1.66667	2.73171
1.31429	0.333333	0.439024	0.923077	2.21053	0.5	0.146341
0.4	1.22222	1.60976	1.23077	2.45614	0.75	0.146341
0.171429	0.148148	0.97561	0.923077	0.491228	1.08333	1.26829
0.857143	0.185185	1.31707	0.307692	1.08772	0.583333	0.829268
0.485714	0.111111	0.292683	0.615385	0.561404	1.16667	0.195122
2.51429	0.814815	2.82927	0.384615	2.73684	0.25	0.146341
0.542857	0.148148	0.243902	0.230769	2.10526	9.08333	0.195122
0.657143	0.333333	0.292683	1.92308	9.33333	0.25	2.43902
0.942857	0.111111	1.36585	2.23077	1.50877	0.5	0.146341
0.0857143	0.148148	0.390244	0.692308	0.385965	1.83333	0.390244
1.02857	68.3333	3.85366	0.384615	0.596491	22.5833	2.09756
0.228571	0.37037	0.634146	0.923077	0.77193	0.25	3.90244
0.428571	0.185185	1.36585	0.307692	1.61404	1.08333	1.7561
2.05714	0.148148	1.46341	2.53846	0.385965	5.08333	0.634146
0.228571	0.407407	0.243902	2.38462	5.19298	0.5	0.292683
0.628571	0.259259	1.46341	1.15385	2.45614	2.66667	0.926829
0.0857143	1.22222	0.487805	2.38462	2.2807	0.5	0.146341
0.714286	28.2222	1.26829	0.307692	1.15789	0.416667	2.78049
5.48571	1.11111	0.243902	0.230769	0.105263	0.416667	0.487805
0.114286	0.333333	1.31707	0.307692	0.210526	0.333333	4.4878
3.25714	0.814815	0.292683	0.692308	1.68421	14.1667	0.390244
0.6	0.296296	0.585366	27.4615	1.19298	2.66667	0.146341
0.885714	0.185185	1.31707	19.5385	1.92982	64	0.439024
0.742857	0.222222	0.195122	3.53846	0.807018	10.8333	0.585366
0.828571	0.814815	1.46341	2.38462	0.947368	1	1.12195
0.4	9.33333	0.585366	3.53846	1.50877	2.08333	1.70732
0.8	0.185185	1.36585	2.46154	1.19298	0.75	5.31707
0.114286	7.37037	0.487805	0.692308	0.561404	2	0.146341
0.257143	0.148148	0.634146	1.92308	2.42105	0.75	0.536585
1.02857	0.333333	0.487805	2.69231	1.15789	1.16667	0.243902
0.4	0.481481	81.9512	2.30769	0.210526	0.5	0.536585
1.05714	5.33333	0.195122	0.461538	0.280702	0.916667	0.487805
0.314286	0.111111	0.341463	0.846154	3.40351	1.08333	0.341463
3.57143	0.111111	0.292683	0.769231	7.82456	0.416667	6.19512
0.171429	0.555556	1.36585	0.230769	0.210526	0.75	0.146341
0.114286	0.111111	4.04878	1	1.75439	0.416667	0.731707
0.457143	5.96296	0.146341	2.15385	10.7018	1.25	0.390244
0.228571	0.148148	5.95122	1.46154	1.92982	0.333333	0.536585
0.571429	0.777778	0.487805	0.692308	0.385965	2.41667	0.146341
0.4	0.111111	0.146341	0.307692	1.92982	0.333333	1.56098
3.05714	1.11111	2.82927	1.53846	0.631579	0.25	3.12195
0.485714	0.259259	0.195122	0.538462	1.05263	1.33333	13.0732
0.0857143	0.111111	1.90244	1.84615	0.210526	1.25	1.21951
0.714286	0.222222	0.146341	1.92308	5.89474	0.25	3.90244
0.171429	0.185185	0.97561	1.84615	0.842105	1.91667	0.146341
0.228571	0.111111	1.5122	0.692308	0.140351	2.41667	0.243902
7.97143	0.37037	0.243902	0.923077	0.245614	102.583	0.439024
0.285714	0.37037	0.341463	0.384615	0.701754	0.25	0.243902
0.971429	0.37037	0.195122	0.538462	0.350877	40.5	2.19512
0.114286	0.925926	0.292683	0.538462	0.280702	0.666667	1.31707
0.0857143	0.148148	1.02439	39.0769	0.982456	0.333333	5.26829
0.2	0.185185	0.634146	5.92308	0.385965	0.5	0.780488
0.0857143	0.962963	0.195122	0.307692	0.140351	0.583333	0.243902
0.114286	2.55556	0.195122	3.61538	0.982456	16.8333	1.60976
0.342857	0.111111	0.97561	0.384615	5.29825	0.416667	0.536585
1.62857	0.444444	0.243902	0.461538	4.24561	0.25	0.390244
1.14286	0.555556	0.195122	0.692308	0.350877	1.91667	2.29268
0.114286	0.259259	2.34146	3.15385	0.631579	0.416667	0.634146
0.485714	0.259259	0.585366	0.230769	0.561404	0.333333	2.82927
0.885714	0.148148	0.195122	0.615385	0.631579	3	2.97561
0.571429	0.111111	1.65854	18.4615	5.01754	6.5	2.29268
6.77143	0.740741	0.146341	7.07692	0.421053	0.5	1.5122
0.228571	0.333333	0.341463	0.615385	6.38596	3.25	1.21951
0.742857	2.18519	0.341463	2.84615	0.315789	0.833333	0.195122
1.02857	0.222222	0.146341	6.53846	0.947368	0.75	0.780488
1.68571	0.222222	1.07317	1.30769	1.85965	0.583333	0.536585
0.342857	0.37037	0.487805	0.692308	0.947368	0.583333	0.292683
3.2	0.148148	0.195122	2.15385	4.35088	164	1.7561
0.142857	0.111111	0.195122	0.538462	0.105263	0.5	0.341463
0.142857	0.296296	0.146341	13	0.701754	0.75	0.292683
1.42857	0.777778	0.390244	0.230769	5.85965	2.08333	4.97561
1.42857	0.185185	0.243902	0.307692	2.31579	3.75	0.390244
0.571429	0.296296	0.195122	0.307692	1.01754	0.25	0.243902
12.0857	0.259259	0.731707	1.07692	1.85965	0.666667	0.195122
5.37143	0.148148	2.14634	0.538462	1.08772	0.333333	0.341463
1.14286	0.296296	0.341463	1.92308	1.92982	5.25	0.146341
0.0857143	0.185185	3.21951	0.769231	0.105263	3.5	0.146341
4.54286	0.296296	0.341463	2	0.385965	2.83333	0.390244
0.142857	0.333333	0.878049	0.230769	1.50877	0.25	2.73171
0.2	0.592593	1.65854	1.15385	1.7193	0.5	2.58537
0.142857	0.148148	0.243902	1	0.280702	225.833	4.39024
1.94286	0.111111	4.68293	12.1538	0.350877	2.33333	5.26829
4.62857	0.148148	0.926829	0.461538	0.842105	0.25	0.146341
0.314286	0.259259	0.439024	1.07692	0.245614	1.08333	0.341463
1.37143	0.185185	0.926829	1.30769	0.77193	0.833333	1.26829
0.371429	0.148148	0.878049	1.07692	0.421053	61.25	8.09756
0.742857	0.111111	1.46341	0.461538	0.666667	0.333333	0.487805
3.8	0.296296	0.243902	0.307692	1.01754	1.41667	0.634146
7	0.185185	0.439024	0.692308	9.75439	0.583333	0.146341
1.68571	0.148148	0.341463	1	3.89474	0.416667	1.5122
0.0857143	0.148148	4.29268	1.61538	0.561404	0.416667	1.07317
5.77143	0.259259	1.12195	2	0.140351	1.16667	0.292683
1.68571	0.111111	0.146341	25.1538	0.491228	1.16667	0.146341
2.68571	0.111111	1.17073	5.76923	0.245614	4.75	17.9024
1.2	0.444444	0.341463	0.692308	2.63158	0.333333	0.439024
1.4	0.148148	0.731707	0.384615	0.280702	6.5	0.780488
2.31429	0.111111	0.926829	1.69231	0.315789	0.583333	0.146341
0.628571	1	0.341463	1.15385	36	0.416667	0.195122
1.62857	0.148148	0.926829	12.4615	0.631579	23.5833	0.292683
1.65714	0.111111	0.195122	0.230769	0.947368	21.5	0.439024
1.31429	0.592593	0.146341	0.461538	1.19298	0.666667	4.39024
0.714286	0.148148	0.439024	1	1.78947	2.41667	0.292683
0.628571	0.62963	0.243902	32.6154	1.50877	0.333333	3.85366
0.285714	0.111111	6.19512	0.615385	0.385965	1.41667	6.78049
0.685714	0.222222	1.85366	22.6154	1.68421	4.91667	0.439024
1.34286	0.111111	0.146341	0.307692	2.2807	0.25	0.243902
0.428571	0.111111	1.36585	3.53846	1.47368	0.583333	1.02439
0.142857	0.333333	0.585366	0.307692	2.17544	0.75	0.390244
0.114286	2.33333	1.36585	439.615	2.70175	0.25	0.341463
2.34286	0.222222	0.829268	0.384615	0.631579	113.917	0.195122
0.285714	0.185185	0.195122	0.307692	0.210526	0.416667	0.341463
6.51429	0.111111	0.243902	1.07692	1.26316	5.25	1.56098
0.571429	1.96296	0.146341	1.23077	13.2982	1.41667	0.341463
1.08571	0.148148	0.585366	0.307692	0.666667	691.417	0.146341
1.2	0.740741	0.634146	1.69231	0.385965	1.08333	6.04878
0.971429	0.185185	0.292683	0.230769	0.596491	0.583333	0.243902
0.228571	0.185185	0.146341	6.23077	1.68421	37.3333	0.146341
3.28571	0.111111	0.634146	0.461538	4	0.25	1.7561
4.48571	0.259259	0.292683	3.07692	0.45614	1.25	0.390244
0.457143	0.259259	0.390244	0.230769	2.2807	0.25	0.146341
1.11429	0.518519	0.390244	6.23077	1.89474	0.25	0.292683
1	1.62963	0.634146	0.846154	1.85965	6.08333	1.36585
0.2	0.222222	0.195122	0.230769	2.42105	3.41667	0.146341
0.0857143	0.222222	0.341463	11.2308	1.12281	1.16667	0.487805
1.17143	0.111111	0.634146	8	1.15789	0.5	0.926829
0.228571	0.111111	2.04878	0.230769	24.6667	0.583333	0.926829
2.54286	0.518519	0.195122	0.692308	1.36842	19.5833	3.07317
1.22857	0.111111	0.439024	1.76923	0.385965	0.25	1.17073
3.42857	0.37037	0.97561	3.23077	0.45614	0.25	0.585366
0.771429	0.111111	3.31707	1.84615	2.63158	0.25	7.56098
0.4	0.111111	0.487805	0.538462	1.4386	1.08333	0.536585
0.228571	0.185185	0.195122	1.07692	0.807018	0.333333	0.780488
0.885714	0.185185	0.146341	0.615385	1.36842	0.25	5.12195
0.0857143	0.296296	0.243902	0.461538	10.8772	9.41667	1.65854
9.74286	0.148148	0.195122	0.307692	0.421053	0.833333	3.41463
0.885714	0.259259	1.85366	0.538462	0.385965	2.25	23.0244
1.37143	0.259259	1.07317	0.692308	0.877193	0.5	1.56098
3.57143	1.03704	0.487805	8.53846	5.36842	9.16667	2.19512
3.65714	0.111111	0.536585	2.61538	0.947368	0.583333	9.90244
0.685714	0.333333	2.39024	0.769231	0.877193	1.33333	0.341463
1.28571	0.296296	0.195122	0.307692	0.210526	5.75	0.634146
4.11429	0.148148	0.536585	0.923077	0.596491	26.25	0.341463
12.6571	0.111111	0.487805	5	1.47368	3.5	0.146341
0.142857	0.259259	5.02439	0.461538	1.15789	6.16667	0.292683
0.885714	0.111111	0.634146	24.9231	1.12281	0.416667	0.146341
0.0857143	0.222222	0.195122	0.307692	0.105263	29.9167	1.5122
1.77143	0.296296	0.146341	0.923077	1.4386	28.9167	0.195122
0.2	0.555556	0.195122	0.769231	1.96491	0.583333	0.146341
0.342857	0.111111	4	0.461538	3.92982	0.833333	0.390244
1.68571	0.296296	2.4878	0.769231	1.33333	0.25	0.243902
0.485714	0.111111	0.439024	6.23077	4.31579	75.9167	0.195122
0.257143	0.148148	1.02439	1.92308	0.947368	0.583333	0.243902
0.114286	0.111111	0.146341	0.307692	0.947368	0.666667	7.46341
0.142857	0.111111	3.17073	0.692308	0.385965	54.25	0.195122
0.514286	0.259259	0.292683	1.38462	0.45614	0.583333	0.146341
1.48571	0.148148	0.926829	4.61538	1.40351	131.917	0.243902
7.85714	0.148148	0.146341	6.23077	1.26316	2	0.243902
0.857143	0.185185	1.36585	2.38462	2.2807	0.583333	0.292683
1.4	0.111111	3.56098	6.46154	4.5614	0.25	0.195122
0.714286	0.111111	1.41463	2.15385	0.105263	0.5	0.292683
0.457143	0.111111	0.195122	0.307692	0.105263	5.33333	0.243902
0.142857	2.92593	0.146341	1.53846	0.315789	0.25	2.58537
0.4	0.259259	0.195122	7.92308	0.736842	0.25	0.341463
0.2	0.296296	2.29268	1.30769	0.491228	0.5	0.146341
0.685714	0.222222	3.41463	0.230769	0.912281	0.416667	0.146341
1.17143	0.222222	0.146341	0.615385	1.64912	2.16667	0.487805
0.6	0.111111	5.56098	1.38462	0.105263	2.08333	0.243902
1	0.111111	0.195122	0.307692	1.68421	2.41667	0.195122
0.685714	0.148148	0.390244	1	0.421053	0.25	0.195122
0.171429	0.111111	0.682927	0.307692	0.245614	0.5	0.439024
0.314286	0.333333	0.341463	0.384615	0.315789	0.25	0.146341
1.28571	0.111111	1.21951	43	3.01754	0.5	0.243902
1.51429	0.296296	1.31707	0.692308	5.12281	0.25	0.292683
1.37143	0.111111	0.243902	11	0.385965	687.583	0.146341
0.428571	0.148148	0.926829	3.53846	2.14035	9.16667	0.439024
0.828571	0.185185	0.243902	4	1.05263	2.41667	4.09756
2.05714	0.148148	0.878049	0.615385	0.877193	0.666667	0.195122
3.71429	0.222222	0.146341	1	0.245614	0.416667	0.146341
6.85714	0.111111	6.29268	2.53846	1.19298	0.5	0.487805
0.228571	0.111111	0.292683	11.3077	0.526316	1.66667	0.634146
0.0857143	0.148148	0.146341	8.46154	8.42105	0.5	0.341463
2.34286	0.111111	0.243902	127.385	0.701754	0.5	0.487805
0.342857	0.111111	0.585366	5.53846	0.280702	4.66667	0.731707
4.31429	0.222222	0.146341	0.230769	1.47368	1.58333	4.04878
0.228571	0.148148	5.02439	0.307692	3.26316	0.416667	0.195122
2.11429	0.111111	3.7561	1.07692	1.05263	1.08333	0.536585
4.88571	0.222222	0.195122	0.307692	0.736842	0.416667	1.90244
2.37143	0.296296	0.682927	1.76923	0.701754	0.583333	0.341463
3.62857	0.111111	0.731707	0.769231	1.05263	0.833333	1.02439
1.45714	0.111111	0.243902	0.461538	0.315789	0.5	0.390244
1.65714	0.185185	0.195122	4.07692	3.29825	1.08333	0.243902
0.114286	0.111111	1.31707	0.461538	2.03509	0.416667	0.292683
0.228571	0.111111	0.536585	0.923077	5.68421	1.91667	1.07317
0.2	0.148148	0.439024	1.46154	0.842105	17	1.7561
0.314286	0.111111	0.243902	0.692308	1.61404	0.25	0.195122
0.571429	0.259259	0.634146	0.230769	0.77193	0.333333	0.341463
0.542857	0.185185	0.390244	0.615385	1.7193	0.333333	0.195122
0.457143	0.111111	0.195122	1.61538	0.491228	8.75	1.02439
0.0857143	0.333333	0.146341	5.69231	0.175439	6.66667	0.195122
0.571429	0.111111	0.195122	0.692308	0.491228	1.08333	0.292683
0.142857	0.111111	0.731707	1.76923	0.315789	1.41667	0.97561
2.25714	0.185185	0.243902	1.53846	0.912281	0.333333	0.536585
2.22857	0.148148	2	0.230769	3.54386	0.25	0.487805
0.0857143	0.111111	1.36585	0.769231	0.210526	64.5	0.780488
1.17143	0.111111	0.341463	0.769231	0.421053	8.75	0.487805
0.228571	0.111111	0.878049	55	3.68421	200.25	0.195122
0.142857	0.111111	0.146341	0.307692	0.526316	0.416667	0.146341
6.37143	0.111111	0.292683	1.30769	5.7193	4.41667	1.46341
0.114286	0.111111	0.243902	0.846154	0.77193	0.333333	0.439024
2.6	0.111111	0.146341	1.30769	4.07018	1.58333	0.439024
0.542857	0.111111	82.7805	0.384615	1.57895	0.333333	0.146341
0.0857143	0.259259	5.26829	0.769231	1.50877	0.333333	0.97561
5.62857	0.111111	0.195122	257.385	0.842105	0.25	1.12195
1.65714	0.111111	0.585366	2.84615	0.842105	1.08333	0.195122
0.142857	0.148148	0.146341	2.46154	1.19298	1.16667	0.146341
2.14286	0.111111	0.292683	0.769231	1.26316	0.5	0.146341
4	0.111111	0.829268	1.07692	0.105263	2.83333	0.341463
2.77143	0.111111	0.243902	4	0.210526	1.25	0.731707
0.342857	0.111111	0.146341	0.384615	0.140351	2.33333	0.195122
1.88571	0.111111	1.80488	0.615385	0.421053	6.58333	0.146341
0.2	0.111111	0.878049	2.92308	0.421053	0.5	1.07317
0.285714	0.148148	0.146341	1.61538	1.96491	0.666667	0.146341
0.371429	0.111111	1.21951	0.692308	0.701754	0.583333	0.146341
0.0857143	0.111111	0.243902	0.230769	4.66667	58.25	1.17073
0.2	0.148148	0.390244	12.5385	1.29825	1.5	0.243902
1.4	0.185185	0.634146	0.230769	0.701754	0.833333	0.878049
0.457143	0.111111	0.634146	4.23077	0.45614	0.5	0.439024
0.171429	0.185185	0.292683	0.769231	1.47368	0.25	0.243902
0.457143	0.111111	0.195122	2.07692	0.105263	0.75	0.243902
0.428571	0.111111	0.439024	1.53846	0.701754	0.75	0.878049
2.2	0.111111	0.536585	1.23077	1.01754	1.16667	0.195122
1.37143	0.111111	2	0.846154	77.9298	7.41667	0.926829
0.0857143	0.111111	0.195122	0.538462	0.77193	0.25	0.341463
1.28571	0.111111	0.146341	0.384615	0.350877	32.8333	0.146341
1	0.259259	0.487805	0.307692	0.807018	2.16667	0.731707
1.05714	0.111111	0.195122	0.769231	0.140351	2.83333	10.878
0.771429	0.111111	0.292683	0.307692	0.561404	0.25	2.14634
0.685714	0.111111	0.146341	0.230769	0.947368	3	0.146341
0.828571	0.111111	0.195122	4.53846	4.70175	2.25	0.146341
1.31429	0.111111	0.146341	1.23077	2.77193	0.916667	0.243902
1.22857	0.111111	0.195122	1.76923	1.54386	27.75	0.243902
0.857143	0.148148	0.195122	66.4615	1.12281	2.58333	0.195122
2.11429	0.222222	0.341463	3.30769	0.175439	0.416667	0.146341
2	0.111111	0.292683	1.76923	0.421053	1	0.146341
0.114286	0.148148	0.97561	0.461538	3.89474	0.5	1.41463
2.82857	0.111111	0.146341	0.538462	2.45614	1.58333	2.14634
1.11429	0.111111	0.195122	3.61538	0.45614	0.666667	0.146341
2.65714	0.111111	0.146341	0.384615	0.666667	12.8333	2.63415
0.0857143	0.111111	0.146341	10.5385	4.98246	0.916667	0.487805
1.08571	0.111111	0.341463	0.461538	0.77193	35.75	2.82927
0.2	0.148148	0.829268	2.07692	2.14035	0.25	1.02439
0.142857	0.111111	0.439024	0.461538	0.245614	2.41667	0.341463
0.342857	0.111111	0.341463	0.769231	2.70175	1.5	0.195122
0.371429		0.390244	3.76923	1.78947	6.08333	0.146341
0.571429	0.176471	1.85366	1.15385	2.5614	65.8333	0.195122
0.514286	0.588235	0.195122	0.923077	1.57895	1	0.487805
0.857143	0.235294	0.243902	1.07692	0.526316	2.25	0.146341
0.257143	2.52941	0.243902	0.230769	0.982456	0.583333	0.243902
0.314286	0.941176	0.439024	0.461538	18.1754	0.333333	0.292683
1.28571	0.882353	4.53659	0.461538	1.22807	0.416667	0.341463
0.114286	0.176471	10.7805	1.76923	0.245614	15.1667	0.195122
0.771429	1.05882	0.536585	0.615385	0.526316	20.8333	0.146341
0.314286	265.412	0.878049	1.30769	1.82456	0.583333	0.585366
1.22857	0.352941	0.390244	3.61538	1.85965	35.8333	0.243902
1.68571	3.17647	0.243902	1.76923	0.842105	3.91667	0.536585
3.51429	2.11765	0.146341	11.7692	13.2281	0.333333	0.243902
0.2	0.705882	0.439024	0.230769	0.596491	1.16667	0.292683
1.65714	4.70588	0.341463	3.30769	0.315789	0.333333	0.146341
4.88571	4.41176	0.634146	6.84615	3.36842	10.1667	0.146341
0.485714	0.529412	0.97561	7.38462	0.385965	1.25	2.78049
0.114286	1.70588	0.682927	0.923077	0.280702	1.33333	0.487805
0.342857	0.176471	5.17073	0.692308	3.26316	0.416667	0.146341
1.97143	5.23529	0.146341	6.61538	0.736842	0.25	0.146341
1.45714	42.2353	0.926829	0.384615	1.47368	0.25	0.195122
0.171429	0.176471	1.02439	0.692308	0.736842	1.33333	2.09756
7.42857	1	0.487805	1.53846	0.105263	293.25	0.146341
0.428571	3.94118	2.09756	0.461538	1.15789	0.583333	0.341463
1.48571	0.470588	1.02439	11.8462	1.08772	1.16667	0.195122
0.6	0.411765	0.390244	1.61538	2.17544	0.833333	0.390244
0.685714	1.29412	0.146341	0.923077	1.75439	0.25	0.243902
0.114286	1.64706	0.341463	2	15.9649	0.25	0.390244
2.14286	3.58824	0.341463	0.923077	0.245614	11.5833	0.829268
3.54286	20.3529	3.56098	0.307692	0.175439	0.333333	0.195122
0.314286	2.17647	0.146341	0.538462	8.07018	1.41667	0.195122
0.228571	2.17647	0.341463	10.1538	1.82456	0.25	0.97561
0.0857143	1.23529	0.146341	0.769231	1.22807	0.416667	0.146341
0.228571	2.23529	0.146341	0.461538	1.89474	35.3333	0.780488
1.08571	13.7647	0.146341	0.307692	2.14035	0.416667	0.146341
1.02857	49.1765	0.292683	19.6923	0.701754	2.66667	0.195122
0.428571	7.82353	0.585366	1	1.4386	0.333333	0.195122
1.62857	1.23529	0.341463	0.461538	1.36842	1.16667	0.146341
1.05714	1.29412	0.146341	1.84615	0.45614	0.75	2.73171
0.285714	0.352941	23.9024	2.07692	0.385965	0.5	0.292683
0.571429	0.882353	1.26829	0.615385	0.105263	0.25	4.73171
1.42857	0.352941	0.195122	2.30769	1.33333	1.33333	0.243902
0.114286	1.23529	0.195122	5.76923	1.57895	0.25	1.07317
0.142857	0.705882	0.146341	2.92308	1.47368	7.58333	0.341463
0.857143	3	0.146341	0.230769	6.94737	0.25	0.195122
1.05714	5.11765	1.36585	0.846154	0.175439	2.91667	2.4878
2.85714	0.588235	0.146341	0.307692	1.15789	0.583333	0.829268
0.171429	0.588235	0.341463	5	0.315789	0.416667	0.195122
1.28571	0.235294	0.243902	0.230769	0.947368	0.333333	0.731707
0.171429	0.235294	7.41463	1.76923	1.40351	2.75	0.146341
0.628571	0.470588	0.146341	0.230769	0.140351	72.5	0.146341
1.8	0.294118	0.439024	1.76923	0.77193	0.5	0.341463
0.228571	0.352941	0.195122	0.769231	0.245614	3	0.146341
0.285714	1.05882	0.146341	5	0.105263	0.333333	0.146341
0.142857	37.4118	0.292683	0.538462	0.631579	57.4167	0.195122
0.971429	0.588235	0.146341	1.23077	1.29825	0.833333	1.02439
4	0.470588	0.97561	4.76923	0.315789	0.5	0.292683
0.114286	0.705882	1.7561	0.307692	3.64912	2.33333	0.146341
0.114286	0.647059	0.487805	1.46154	0.315789	0.666667	0.146341
0.114286	1	0.146341	0.230769	0.280702	0.416667	0.146341
2.42857	0.294118	0.243902	0.461538	2	0.666667	0.243902
3.82857	0.823529	0.146341	0.769231	7.05263	0.416667	0.146341
1.34286	24.6471	1.41463	5.23077	0.526316	45	0.146341
0.628571	3.76471	0.878049	1.23077	1.92982	17.6667	0.146341
0.0857143	0.411765	0.390244	36.1538	5.29825	15.5833	0.146341
1.02857	0.352941	1.65854	0.692308	0.45614	1.58333	0.243902
2.22857	1.47059	0.341463	0.461538	6.24561	0.25	6.43902
1.17143	4.29412	0.146341	0.461538	0.140351	0.25	0.390244
3.08571	0.176471	0.243902	0.384615	1.12281	1	0.243902
1.62857	1.52941	0.243902	0.307692	8.14035	0.416667	0.243902
0.0857143	0.411765	2.2439	0.230769	1.15789	12.3333	0.731707
0.0857143	1.05882	0.439024	0.461538	0.596491	0.416667	0.195122
0.2	3.52941	0.146341	1.07692	1.82456	0.416667	0.146341
0.342857	7.35294	0.195122	0.846154	0.140351	0.333333	0.146341
0.0857143	3.52941	0.341463	1.53846	0.631579	3.25	0.195122
4.57143	17.8824	1.02439	2.92308	0.842105	0.25	0.146341
0.971429	3.29412	0.439024	0.307692	2.24561	1.58333	0.146341
0.285714	451.176	1.21951	0.230769	3.82456	0.5	0.439024
0.142857	0.235294	0.390244	1	0.491228	27.5833	0.195122
2.22857	319.294	0.634146	0.230769	0.140351	0.25	0.634146
0.2	3.94118	0.195122	0.538462	1.15789	0.333333	0.146341
2.94286	0.176471	0.634146	0.230769	2.17544	2.5	0.341463
0.257143	4	0.146341	3	0.631579	1	0.195122
0.2	0.411765	0.731707	1.30769	0.350877	0.25	0.146341
0.285714	1.41176	0.195122	0.538462	0.385965	0.5	0.926829
0.514286	0.764706	0.341463	0.384615	0.175439	0.25	0.146341
0.114286	3.64706	0.146341	0.230769	0.421053	0.5	0.195122
0.314286	71.5882	0.195122	0.230769	1.05263	0.333333	0.146341
0.114286	0.588235	0.146341	0.384615	1.36842	0.25	0.146341
0.714286	1.11765	0.146341	0.846154	0.315789	0.666667	0.243902
0.228571	0.352941	2.14634	2.30769	2.45614	1	0.243902
2.4	0.823529	0.780488	0.461538	0.736842	0.416667	0.634146
2.28571	2	0.243902	673.077	3.89474	0.25	0.146341
0.0857143	0.294118	0.195122	1.46154	2.98246	0.833333	0.439024
5.02857	0.176471	0.146341	14.9231	0.140351	0.333333	0.195122
1.02857	3.23529	0.390244	0.769231	0.666667	0.5	0.146341
0.142857	0.235294	1.21951	1	0.140351	0.333333	0.243902
0.114286	0.647059	0.195122	0.307692	0.842105	5.33333	0.146341
0.314286	0.647059	1.02439	0.769231	0.736842	5.58333	0.146341
0.0857143	0.764706	0.292683	0.307692	2.42105	0.666667	0.146341
0.457143	1.29412	2.2439	0.230769	1.19298	0.333333	0.146341
0.8	0.470588	0.243902	2	0.350877	3.08333	0.146341
0.542857	0.352941	0.585366	1.92308	1.26316	0.75	0.146341
3.05714	22.5294	0.146341	0.692308	16.6316	1.16667	0.146341
0.114286	2	0.195122	0.538462	4.38596	0.416667	0.146341
0.114286	2.64706	0.195122	1.30769	1.08772	160.583	0.439024
0.314286	3.52941	0.487805	0.461538	0.280702	77.5833	0.146341
0.114286	67.1765	0.243902	1.38462	1.12281	0.25	0.195122
1.51429	0.705882	0.195122	1.84615	0.210526	6.33333	0.146341
0.114286	0.235294	0.292683	1	0.350877	0.25	0.146341
0.4	0.176471	1.56098	30.6923	0.280702	0.416667	0.682927
0.0857143	0.176471	0.146341	447.538	0.807018	14.9167	0.146341
21.0571	0.294118	1.60976	0.230769	0.421053	0.25	0.146341
0.8	2.11765	0.390244	1	1.4386	0.25	0.146341
0.485714	9.88235	0.634146	0.692308	0.140351	1	0.146341
0.6	3.47059	0.146341	0.307692	0.982456	0.25	0.243902
0.228571	0.294118	0.292683	1.15385	0.385965	0.5	0.146341
0.0857143	1.64706	0.195122	0.307692	0.421053	0.5	0.195122
3.14286	0.352941	0.780488	0.384615	1.33333	1.58333	0.146341
0.228571	51.8235	0.195122	0.230769	0.210526	1.08333	0.195122
0.0857143	0.235294	1.17073	1.38462	2.42105	14.6667	0.146341
0.0857143	9.64706	0.146341	1.23077	1.12281	0.25	0.146341
0.228571	380.647	0.146341	2	2.38596	0.416667	0.195122
0.114286	0.176471	0.243902	0.384615	0.421053	3.33333	0.195122
0.228571	0.294118	0.243902	0.230769	0.45614	3.41667	0.195122
1.45714	55.2941	0.682927	0.846154	0.210526	3.41667	0.146341
1.4	1.17647	0.390244	1.07692	0.245614	1.5	0.146341
1.85714	0.529412	2.73171	0.769231	0.912281	0.333333	0.195122
0.171429	1	0.341463	1.07692	0.631579	0.5	0.146341
0.114286	55.8824	0.243902	0.769231	1.75439	105.667	0.146341
0.0857143	0.764706	0.195122	1.30769	11.2632	0.916667	0.146341
8.08571	6.82353	0.439024	0.307692	0.701754	1.66667	0.146341
1.6	0.588235	0.585366	33.4615	2.98246	3.91667	0.146341
1.94286	0.764706	0.146341	0.307692	0.105263	0.25	0.146341
0.428571	0.235294	0.243902	0.538462	0.807018	0.25	0.146341
0.285714	0.588235	0.292683	39.7692	1.50877	17.8333	0.146341
0.428571	0.294118	0.341463	0.615385	0.350877	0.666667	0.195122
0.457143	0.882353	0.341463	1.61538	1.12281	2.08333	0.146341
1.48571	0.823529	0.146341	0.384615	1.22807	1.25	0.146341
0.485714	0.294118	0.146341	0.461538	0.105263	0.25	0.146341
0.114286	5.35294	1.46341	0.230769	1.75439	5.25	0.146341
0.2	1.94118	0.243902	1.07692	2.2807	0.833333	0.146341
0.285714	0.235294	0.146341	1.46154	0.631579	0.25	0.146341
0.285714	0.411765	0.390244	0.769231	0.45614	0.5	0.146341
0.371429	10.1765	0.146341	0.230769	1.01754	7.41667	0.146341
0.285714	0.411765	1.12195	0.384615	13.0877	1.83333	0.146341
1.02857	0.176471	0.195122	10.9231	1.92982	0.416667	0.146341
1.42857	1.58824	0.243902	0.307692	1.05263	0.583333	0.243902
0.171429	1	0.439024	0.538462	0.701754	0.25	0.195122
0.171429	0.470588	3.07317	0.384615	0.350877	1.58333	0.243902
0.371429	0.647059	2.58537	0.307692	0.842105	0.333333	0.146341
0.228571	0.235294	0.195122	0.307692	0.315789	23.4167	0.146341
0.514286	3.47059	0.146341	3	0.315789	0.25	0.195122
0.142857	3.17647	0.146341	2.61538	0.807018	23	0.146341
0.0857143	2.52941	0.97561	0.384615	0.140351	2.75	0.146341
1.31429	2.17647	0.146341	0.307692	0.736842	44.75	0.146341
0.228571	0.352941	0.146341	4.38462	0.631579	0.333333	0.195122
0.457143	0.764706	0.146341	0.538462	4.14035	0.25	0.146341
0.685714	0.411765	4.2439	0.769231	0.526316	1	0.146341
0.0857143	1.76471	0.634146	0.615385	0.77193	0.916667	0.146341
1.08571	2.23529	0.390244	0.307692	0.45614	0.833333	0.146341
0.142857	0.529412	0.146341	0.615385	2.87719	0.666667	0.146341
0.428571	2.82353	1.60976	4.23077	0.807018	32.5	0.146341
0.4	0.705882	0.195122	1	0.175439	1.25	0.146341
0.171429	19.5294	0.341463	1.38462	0.631579	2.08333	0.146341
0.0857143	0.235294	0.146341	1.38462	6.2807	1.33333	0.146341
4.14286	1.94118	0.146341	4.69231	0.491228	16.8333	0.146341
0.114286	45.6471	1.07317	0.384615	1.7193	1.08333	0.146341
0.142857	1.23529	0.146341	0.692308	3.85965	0.583333	0.146341
0.942857	0.647059	0.146341	1.92308	1.47368	0.25	0.146341
0.342857	7.64706	0.292683	0.307692	0.280702	0.416667	0.146341
1.6	0.294118	3.26829	3.23077	0.45614	0.416667	0.146341
0.2	0.352941	0.97561	0.384615	0.982456	0.583333	0.146341
0.857143	2.52941	0.146341	1.76923	0.140351	637.917	0.146341
0.0857143	4.76471	0.487805	0.307692	1.68421	0.583333	0.146341
0.114286	16.2353	0.292683	0.230769	0.210526	0.666667
0.114286	0.470588	2.87805	0.307692	1.96491	0.416667	0.606742
0.114286	0.176471	0.146341	60.6923	0.666667	0.5	3.61798
5.48571	0.176471	0.195122	466.769	0.350877	284.75	13.5056
0.171429	2.29412	0.195122	8.61538	1.82456	1.16667	0.11236
0.0857143	0.411765	0.243902	0.615385	1.26316	0.25	0.494382
0.228571	1.35294	0.243902	2.46154	1.47368	3.41667	0.202247
0.142857	2.70588	0.243902	0.461538	0.105263	4	0.449438
0.8	1.94118	0.195122	0.923077	2.66667	0.416667	0.382022
4.14286	1.11765	0.146341	8.07692	0.175439	0.333333	0.764045
0.628571	0.235294	0.585366	0.461538	0.175439	0.75	8.96629
0.257143	0.411765	0.195122	2	1.22807	0.333333	0.359551
0.342857	1.23529	0.390244	0.384615	0.350877	0.25	7.05618
0.0857143	0.705882	0.195122	3	0.210526	80.5	0.831461
0.142857	0.411765	0.146341	6.46154	1.33333	0.25	0.292135
1.14286	0.411765	0.195122	16.6923	0.175439	0.25	2.44944
0.114286	0.647059	0.487805	13.4615	1.33333	0.583333	0.359551
1.8	20.8235	0.243902	0.769231	0.245614	0.333333	1.77528
0.114286	5.29412	0.146341	0.461538	0.947368	0.5	0.269663
1.65714	2.70588	0.536585	0.307692	2.2807	0.666667	0.449438
0.857143	0.882353	0.195122	2.53846	0.140351	3.25	12.5169
0.371429	0.235294	44.8293	0.307692	1.33333	20.75	0.606742
2.8	0.411765	0.146341	8.53846	2.87719	0.333333	1.8427
0.142857	0.411765	1.90244	0.230769	3.22807	2	1.73034
0.114286	0.588235	0.780488	3.84615	0.245614	0.25	0.764045
0.171429	0.705882	0.243902	0.538462	0.140351	1.08333	1.79775
0.771429	1.05882	0.487805	2.69231	0.736842	0.5	0.449438
0.628571	3.41176	0.243902	223.615	0.45614	0.75	0.876404
0.342857	1.58824	0.341463	0.615385	0.140351	0.25	1.25843
0.142857	0.411765	0.243902	0.769231	0.315789	1.25	0.764045
0.228571	4.47059	0.292683	0.923077	1.08772	0.5	7.1236
0.171429	6.23529	0.146341	0.538462	2.63158	0.5	4.44944
0.314286	0.588235	0.146341	0.692308	1.4386	0.333333	7.23596
0.857143	0.411765	0.146341	1.23077	1.08772	2.83333	0.247191
0.228571	8.41176	0.439024	0.230769	0.210526	0.75	0.157303
0.771429	0.529412	0.926829	11	1.22807	0.5	1.77528
1.85714	0.588235	0.195122	0.230769	0.912281	0.25	0.719101
1.34286	0.647059	0.146341	0.384615	5.82456	1	0.157303
0.0857143	8.88235	0.146341	9.76923	1.08772	2.58333	0.494382
0.342857	0.352941	1.36585	1.07692	3.12281	0.333333	1.01124
0.228571	0.941176	0.195122	0.230769	0.175439	433.333	0.314607
0.628571	4.11765	0.195122	2.69231	0.105263	0.333333	1.75281
0.2	0.470588	0.146341	0.769231	0.561404	0.333333	5.25843
0.457143	0.529412	0.146341	43.8462	0.421053	0.583333	2.51685
0.628571	0.235294	0.195122	0.538462	2.52632	0.25	4.42697
0.457143	0.352941	0.439024	1.15385	0.210526	0.416667	0.0898876
0.828571	1.52941	0.536585	0.923077	1.64912	0.666667	0.382022
0.542857	9.64706	0.146341	0.307692	0.842105	0.416667	1.16854
3.48571	5.41176	0.146341	0.846154	0.421053	0.25	0.0898876
0.514286	0.529412	0.195122	1.07692	0.596491	3.08333	1.34831
8.28571	2.82353	0.195122	5.69231	5.26316	2.41667	0.11236
0.142857	0.294118	0.585366	0.384615	0.842105	0.666667	1.57303
0.0857143	1.41176	0.146341	1.23077	0.666667	5.58333	0.134831
0.4	1.23529	0.243902	2.92308	2.94737	1	0.11236
0.171429	9.29412	0.731707	2.61538	0.45614	2.5	0.674157
0.8	0.235294	0.292683	0.307692	1.05263	0.25	1.07865
0.342857	1.05882	2.82927	0.384615	1.4386	0.583333	1.2809
1.51429	0.294118	0.146341	0.230769	0.280702	0.5	1.79775
4.25714	0.411765	0.195122	0.384615	4.49123	2	0.404494
0.914286	49.0588	2.97561	0.384615	1.82456	0.75	1.79775
1.48571	0.235294	0.292683	0.692308	0.385965	2.08333	0.674157
0.485714	0.294118	0.146341	0.461538	0.947368	0.416667	6.31461
0.114286	0.647059	0.634146	1.30769	0.105263	0.333333	3.79775
0.314286	1	0.146341	10.4615	0.666667	0.25	0.269663
0.4	2.47059	0.146341	0.230769	0.350877	1.33333	0.651685
0.228571	5.29412	0.195122	1.38462	2.17544	45.5833	0.359551
0.0857143	0.705882	0.292683	0.384615	0.982456	0.416667	0.516854
0.142857	0.235294	0.195122	4.23077	1.19298	0.416667	4.20225
5.17143	0.705882	1.12195	0.307692	1.05263	1.5	1.07865
1.82857	0.294118	0.146341	0.692308	0.77193	60.25	0.741573
2.51429	13.1765	0.243902	0.230769	0.105263	1.25	0.808989
0.342857	0.764706	0.243902	0.615385	0.245614	3.66667	2.58427
0.114286	0.352941	0.292683	8.76923	3.19298	3.08333	0.47191
0.0857143	0.411765	0.146341	0.461538	1.4386	0.583333	5.73034
3.71429	0.176471	0.341463	0.230769	0.77193	0.25	1.57303
0.914286	44.2941	0.146341	0.538462	3.19298	0.25	3.48315
0.114286	0.294118	0.195122	0.692308	0.912281	0.666667	2.04494
0.142857	2.35294	0.146341	6.53846	0.807018	0.333333	1.70787
0.0857143	2.52941	27.2683	0.461538	6.10526	0.5	0.561798
0.0857143	1.47059	0.341463	11.8462	0.385965	1.66667	10.1348
0.285714	0.176471	0.146341	3.53846	0.210526	0.833333	0.0674157
0.142857	1.41176	0.146341	0.692308	0.561404	1.41667	0.494382
0.457143	0.588235	0.195122	4.15385	0.77193	0.5	0.426966
0.742857	0.588235	0.195122	0.461538	0.140351	3.83333	4.35955
0.0857143	0.294118	0.146341	1.84615	0.526316	0.5	0.11236
1.88571	3.11765	0.243902	1.61538	0.210526	1.83333	0.47191
0.114286	4.41176	0.146341	0.307692	1.92982	0.5	0.561798
0.228571	1.05882	0.195122	0.692308	3.57895	0.25	1.32584
0.485714	111.882	0.195122	0.615385	0.596491	3	3.4382
1.08571	30.5294	0.195122	0.307692	0.140351	0.833333	1.05618
0.742857	0.941176	0.146341	1.15385	0.350877	1.5	1.14607
0.2	0.411765	0.146341	0.461538	3.40351	0.833333	2.76404
0.342857	0.764706	0.536585	4.69231	3.92982	0.583333	2.26966
0.8	0.764706	0.146341	5.61538	0.77193	0.25	1.23596
2.4	4.82353	0.146341	0.692308	1.22807	0.5	0.292135
4.31429	0.588235	0.146341	1.15385	0.491228	1.83333	9.25843
0.171429	0.588235	0.146341	1.30769	1.54386	0.25	0.157303
0.6	1.76471	0.292683	0.307692	16.386	4.58333	1.01124
0.228571	0.176471	0.146341	1.76923	2.35088	2.5	0.269663
0.771429	0.352941	0.146341	1.23077	1.26316	1.58333	0.292135
0.114286	69	0.195122	0.538462	1.57895	0.25	1.1236
0.0857143	1.17647	0.146341	1.76923	0.421053	0.416667	4.96629
0.142857	7.35294	0.341463	1.76923	4.03509	0.25	0.314607
2.22857	1	0.146341	0.384615	0.526316	5.33333	0.741573
0.228571	1.05882	0.195122	21.2308	0.105263	0.25	0.11236
0.171429	1.05882	0.146341	0.923077	0.561404	0.25	1.61798
5.57143	2.05882	0.146341	3.30769	14.0351	8.83333	1.2809
0.228571	0.882353	0.195122	0.538462	2.98246	0.583333	0.0898876
0.0857143	0.176471	0.146341	0.384615	2.21053	0.583333	1.2809
1.97143	0.294118	0.439024	3	0.561404	3.91667	3.05618
0.0857143	0.588235	0.146341	0.615385	0.280702	0.25	0.988764
4.97143	3.47059	0.195122	0.230769	1.01754	0.333333	0.786517
3.05714	0.176471	0.146341	1.07692	0.842105	0.833333	2.08989
4.08571	0.294118	0.146341	1.30769	0.140351	0.75	0.0898876
0.657143	0.470588	0.146341	9.23077	0.105263	0.916667	1.57303
1.94286	0.411765	0.146341	0.615385	0.385965	0.416667	0.314607
4.65714	0.176471	0.146341	0.307692	0.491228	3.5	10.4494
0.171429	1.11765	0.536585	0.307692	0.175439	0.916667	2.44944
1	0.764706	0.146341	0.230769	0.45614	1.25	0.382022
4.97143	1.64706	0.146341	0.461538	0.561404	0.583333	0.921348
0.0857143	0.470588	0.195122	1.23077	0.631579	0.25	2.20225
20.5714	0.411765	0.195122	0.307692	0.526316	0.25	0.157303
0.171429	0.176471	0.195122	0.384615	0.315789	0.25	0.247191
11.4286	1.82353	0.195122	0.384615	0.701754	35.3333	11.7303
1	7.41176	0.146341	0.384615	8	2.25	1.25843
0.0857143	0.235294	0.243902	1.84615	0.877193	0.583333	2.24719
43.3714	3.11765	0.146341	0.384615	0.736842	0.25	1.88764
0.171429	3.94118	0.146341	0.230769	1.01754	0.75	0.292135
0.0857143	0.294118	0.146341	0.615385	0.175439	1.25	0.741573
0.714286	1.11765	0.146341	0.846154	0.280702	0.666667	9.4382
1.54286	0.235294	0.146341	0.384615	2.17544	82	0.382022
0.114286	2.88235	0.146341	0.846154	2	2.25	0.426966
4.68571	0.588235	0.146341	2.84615	0.842105	0.333333	1.21348
0.571429	0.294118	0.146341	0.307692	2.98246	0.416667	0.58427
0.657143	4	0.195122	0.615385	0.210526	0.416667	1.25843
0.2	19.2353	0.146341	0.692308	1.82456	0.666667	0.0898876
0.257143	0.235294	0.292683	0.307692	0.631579	0.583333	23.8652
0.171429	0.588235	0.146341	0.230769	0.561404	2.41667	5.82022
0.171429	4.64706	0.487805	0.615385	1.05263	0.5	1.05618
5.54286	0.470588	0.146341	0.538462	0.77193	0.416667	0.0674157
0.171429	1.88235	0.390244	0.384615	0.210526	0.25	0.876404
0.142857	0.411765	0.146341	116.538	0.77193	2.66667	2.69663
0.257143	1.29412	0.146341	0.307692	0.491228	2.91667	1.25843
0.142857	0.588235	0.146341	0.230769	0.105263	15.6667	0.0898876
0.542857	0.588235	0.146341	0.307692	2.98246	298.667	1.57303
0.428571	6.94118	0.146341	2	0.105263	17.6667	0.11236
3.62857	0.352941	0.146341	0.384615	5.54386	0.25	0.404494
0.885714	0.647059	0.243902	1	0.280702	0.333333	2.62921
5.65714	3	0.146341	0.384615	0.631579	2.91667	0.808989
0.228571	1.52941	0.146341	1.30769	0.982456	0.583333	0.11236
0.142857	0.823529	0.146341	0.230769	0.491228	0.25	0.719101
0.285714	2.05882	0.243902	0.230769	0.596491	0.416667	1.14607
0.371429	20.9412	0.146341	0.846154	0.280702	0.333333	0.179775
0.0857143	1	0.146341	0.230769	1.29825	1.16667	1.82022
0.142857	2.23529	0.146341	0.230769	0.245614	0.416667	1.41573
0.171429	1.23529	0.146341	0.307692	0.175439	0.333333	4.53933
0.114286	0.352941	0.341463	0.538462	1.85965	5.25	1.25843
0.114286	0.470588	0.195122	0.384615	1.19298	0.5	3.39326
0.2	0.764706	0.195122	0.615385	1.82456	0.416667	0.674157
0.114286	2.41176	0.146341	5.61538	1.50877	101.25	0.202247
0.171429	0.352941	0.146341	0.230769	0.350877	1.5	0.359551
0.0857143	33.4706	0.146341	2.15385	3.36842	0.5	4.74157
0.485714	0.294118	0.146341	4.38462	1.29825	0.25	3.50562
0.0857143	0.352941	0.146341	0.538462	0.315789	0.5	4.1573
0.542857	0.352941	0.146341	128.846	0.140351	0.5	1.32584
0.0857143	0.235294	0.146341	0.384615	0.631579	0.583333	0.134831
0.0857143	0.411765	0.146341	1.76923	0.491228	2.75	0.561798
0.0857143	0.352941	0.195122	1.53846	2.84211	0.25	3.39326
0.114286	13.9412	0.146341	0.307692	2.14035	0.333333	4.8764
0.371429	4.29412	0.146341	0.538462	0.912281	4.41667	0.134831
0.0857143	0.647059	0.146341	2.69231	3.57895	0.666667	11.0112
0.8	0.470588	0.146341	4.15385	0.245614	0.75	0.853933
4.14286	1.23529	0.146341	0.230769	6.21053	0.25	1.82022
1.65714	0.529412	0.146341	0.230769	1.57895	0.25	0.224719
0.457143	0.470588	0.146341	1.92308	3.33333	0.5	1.03371
0.228571	0.470588	0.146341	0.307692	0.175439	0.833333	0.898876
0.114286	0.235294	0.146341	0.230769	0.140351	0.5	0.179775
0.2	0.352941	0.146341	0.230769	1.40351	23.9167	1.73034
0.714286	0.176471		0.307692	1.85965	0.25	1.93258
2.25714	0.235294	0.642857	0.461538	0.210526	0.833333	1.4382
0.114286	0.705882	0.607143	1.92308	0.210526	0.25	0.47191
0.171429	1.17647	0.607143	0.461538	0.245614	0.333333	0.179775
0.371429	0.176471	1.32143	3	0.45614	0.416667	1.82022
0.285714	0.705882	4.14286	0.307692	0.631579	0.333333	1.01124
3.11429	0.294118	10.6071	0.384615	0.982456	6.16667	0.0898876
1.68571	0.411765	0.857143	1.15385	3.7193	0.25	1.19101
1.02857	0.294118	1	1.23077	2.10526	0.25	3.70787
0.342857	1.35294	1.42857	0.846154	0.210526	0.25	2.44944
0.0857143	0.294118	0.107143	6.07692	0.561404	1.41667	0.134831
0.6	0.352941	0.392857	1.61538	0.912281	0.75	0.179775
0.0857143	2.64706	10.6429	0.846154	1.68421	0.5	0.516854
0.314286	0.235294	0.25	1.92308	0.315789	0.25	3.66292
0.142857	163.176	0.321429	2.84615	0.77193	0.25	0.0674157
0.0857143	0.235294	1.82143	0.230769	0.596491	1.33333	0.224719
0.142857	16.1176	5.53571	364.231	0.385965	0.25	0.449438
0.114286	0.647059	0.25	2.69231	0.280702	2.16667	0.674157
2.65714	0.235294	0.464286	1.69231	0.210526	0.583333	0.58427
0.742857	65.1176	0.714286	2.53846	0.140351	0.5	0.11236
0.228571	0.294118	0.107143	410.769	0.105263	0.333333	4.38202
0.2	2.64706	1.89286	1.23077	1.12281	64.0833	3.91011
0.0857143	0.470588	4.32143	0.923077	0.315789	1.16667	0.247191
0.314286	0.941176	1.35714	0.384615	0.701754	0.666667	2.51685
0.0857143	0.411765	1.03571	0.846154	1.15789	0.25	1.14607
7.14286	1.17647	0.357143	0.384615	1.01754	0.5	0.47191
0.114286	12.1765	0.535714	7.61538	1.47368	1.33333	2.1573
0.142857	1.88235	0.321429	5.46154	1.68421	1	0.808989
0.8	2.64706	1.14286	0.307692	0.526316	0.583333	3.8427
1.22857	2.70588	1.39286	0.230769	1.22807	0.25	0.157303
1.2	1.41176	4	0.461538	1.08772	0.333333	0.47191
0.114286	3.11765	2.25	43.6154	0.245614	0.75	2.29213
0.514286	3.05882	0.535714	0.538462	0.701754	0.666667	0.382022
0.0857143	0.882353	0.321429	0.384615	2.5614	2.16667	3.91011
0.257143	0.176471	0.107143	1.07692	0.105263	2.41667	1.59551
0.685714	0.294118	2.60714	1.23077	0.105263	39.6667	0.426966
0.0857143	0.470588	3.03571	6.69231	0.280702	0.666667	0.426966
0.0857143	2.58824	1.39286	0.538462	1.22807	0.416667	2.47191
0.0857143	0.588235	0.392857	0.307692	0.315789	0.25	0.224719
0.171429	20.7647	0.25	0.538462	0.666667	0.333333	1.01124
0.142857	0.235294	1.67857	0.307692	0.210526	1.25	0.561798
0.142857	1.64706	1.10714	0.307692	0.596491	1	0.629213
0.228571	2.41176	7.17857	1.07692	0.210526	0.333333	0.382022
0.171429	0.411765	0.321429	0.230769	0.280702	0.833333	0.359551
0.114286	0.647059	0.642857	7.15385	0.561404	0.833333	1.50562
0.514286	1	1.67857	0.538462	7.57895	3.41667	2.76404
0.0857143	8.29412	0.607143	2	0.315789	3.41667	0.269663
0.0857143	0.705882	0.714286	0.538462	0.140351	4.41667	2.49438
0.0857143	3.70588	1	2	0.385965	0.916667	0.179775
0.285714	0.176471	6.07143	0.538462	0.842105	0.25	10.3146
0.0857143	0.588235	1.03571	1.53846	0.140351	0.25	0.247191
0.628571	0.235294	0.5	0.307692	0.280702	0.5	3.07865
0.114286	0.294118	1.89286	3.07692	0.561404	0.916667	0.404494
0.285714	1.88235	0.321429	0.307692	0.45614	0.333333	1.37079
0.114286	0.411765	0.678571	15.3077	2.14035	0.25	0.831461
0.2	0.470588	0.321429	4.07692	1.08772	0.333333	0.539326
0.0857143	8.11765	10.8929	0.307692	0.666667	0.333333	0.269663
0.0857143	0.529412	2.32143	0.384615	0.631579	0.583333	1.25843
8.37143	0.411765	0.142857	0.230769	0.45614	0.333333	0.157303
0.0857143	1.41176	0.25	0.384615	2.91228	0.5	0.764045
0.0857143	0.176471	0.535714	1.23077	0.526316	0.583333	0.966292
0.4	0.529412	0.214286	1.92308	0.210526	0.333333	2.96629
0.0857143	1.70588	5.46429	0.692308	0.561404	0.833333	1.25843
0.0857143	0.176471	2.96429	1.84615	0.105263	0.5	1.05618
0.0857143	1.11765	0.321429	0.307692	0.315789	6.83333	0.0898876
5.85714	4	0.285714	0.692308	0.105263	0.25	3.16854
0.114286	0.588235	1.71429	0.230769	0.140351	0.416667	0.539326
0.142857	0.176471	0.178571	0.538462	0.315789	0.333333	1.14607
0.0857143	7.23529	1.78571	0.230769	0.45614	0.583333	1.95506
0.142857	0.470588	1.89286	0.230769	1.47368	0.25	1.34831
0.314286	1.05882	1.07143	1.07692	3.4386	0.75	0.337079
0.0857143	0.764706	3.85714	0.307692	0.526316	0.833333	0.898876
0.0857143	1.17647	0.178571	0.923077	0.526316	0.25	2.26966
0.0857143	4.29412	0.821429	1.30769	2.5614	0.25	0.696629
0.2	8.70588	0.321429	0.538462	0.105263	0.916667	1.21348
0.0857143	2	1.32143	16.7692	1.68421	2	7.8427
0.0857143	0.470588	1.25	0.230769	0.210526	0.333333	3.03371
0.2	1.17647	0.25	1.69231	0.350877	0.916667	6.49438
0.142857	13.4118	1.75	0.538462	0.912281	0.333333	1.23596
0.914286	0.941176	1.21429	2.15385	0.210526	0.833333	0.831461
0.114286	0.529412	0.678571	1.76923	3.12281	1.33333	2.08989
0.257143	0.235294	1.21429	0.307692	0.666667	0.25	0.359551
0.257143	0.176471	0.178571	0.538462	0.631579	0.25	0.202247
0.542857	1.47059	1.14286	2.53846	0.807018	2.33333	1.55056
0.142857	0.176471	0.535714	0.692308	0.77193	0.75	2.1573
0.114286	0.941176	0.785714	101.769	2.87719	0.25	0.651685
0.0857143	11.4118	10.9643	0.307692	3.82456	0.333333	1.05618
0.114286	0.176471	1.03571	1.61538	0.491228	0.916667	1.03371
0.114286	237.176	4.25	0.769231	0.105263	0.5	0.741573
0.0857143	0.470588	0.214286	1	24.2807	111.917	0.382022
0.0857143	0.882353	0.107143	1.61538	3.08772	0.833333	2.51685
0.228571	0.176471	1.5	0.384615	0.315789	0.25	0.561798
3.6	0.588235	2.96429	0.461538	0.807018	11.1667	0.292135
0.0857143	0.529412	0.714286	0.615385	0.140351	0.75	0.11236
0.114286	0.411765	4.21429	0.461538	0.105263	10.3333	2.29213
0.0857143	0.235294	0.392857	0.923077	1.19298	39.4167	1.1236
0.114286	0.705882	0.142857	0.230769	0.140351	0.25	0.561798
0.0857143	0.705882	0.142857	0.692308	0.45614	0.75	3.32584
0.171429	0.588235	0.178571	0.230769	1.61404	0.583333	0.269663
0.0857143	1.88235	1.32143	8.23077	0.421053	0.25	0.0674157
0.0857143	0.294118	0.107143	0.230769	0.385965	0.5	0.0898876
0.771429	0.411765	0.321429	0.230769	0.210526	5.58333	0.11236
0.0857143	41.8824	0.321429	0.230769	0.45614	0.666667	3.93258
0.0857143	0.529412	3	0.461538	2.98246	0.583333	1.52809
0.0857143	14.1176	0.392857	0.307692	3.15789	0.583333	0.382022
0.428571	0.294118	2.85714	0.230769	5.22807	0.25	1.01124
0.0857143	9.52941	30.8571	1.15385	3.75439	0.416667	4.29213
4.65714	0.647059	9.42857	0.384615	10.9123	0.416667	0.337079
0.0857143	2.41176	4	2.38462	1.68421	0.25	0.94382
0.0857143	0.411765	5	0.230769	0.596491	1.58333	0.516854
0.0857143	0.235294	0.142857	0.538462	0.631579	0.25	0.719101
0.2	0.294118	0.964286	11.7692	1.40351	0.333333	5.79775
0.485714	0.294118	0.214286	0.384615	0.105263	0.5	1.21348
11.7429	0.411765	0.392857	0.769231	5.96491	0.833333	0.382022
0.142857	1.41176	1.64286	0.769231	1.75439	0.666667	1.39326
0.0857143	2.64706	2.64286	1.15385	0.105263	0.333333	4.5618
0.114286	2.35294	0.107143	1.07692	1.4386	0.333333	0.269663
0.171429	0.235294	5.5	0.923077	0.350877	8.33333	0.674157
0.0857143	0.882353	0.107143	1.15385	0.982456	0.666667	0.786517
0.0857143	0.352941	0.214286	4.30769	1.15789	0.25	1.82022
0.142857	10.3529	4.96429	0.230769	1.61404	0.333333	0.157303
0.114286	1.05882	0.285714	0.538462	2	0.25	0.359551
0.142857	0.823529	4.46429	0.692308	1.47368	1.08333	0.0898876
0.171429	0.823529	1.53571	0.615385	0.245614	1.41667	17.618
0.2	4.23529	0.107143	0.307692	0.245614	0.416667	0.719101
3.85714	0.588235	2.78571	10.8462	0.421053	0.25	0.449438
0.114286	1.47059	1.07143	0.230769	0.385965	2.08333	0.247191
0.257143	0.176471	9.07143	0.384615	1.15789	3.58333	9.32584
0.314286	5.52941	0.5	0.230769	1.12281	0.583333	1.05618
0.142857	0.235294	2.64286	0.615385	1.4386	0.916667	0.269663
0.0857143	0.882353	0.142857	0.692308	3.12281	1	0.404494
0.257143	0.235294	0.714286	0.230769	0.491228	1.16667	2.44944
0.0857143	0.647059	0.75	0.384615	6.91228	0.25	2.11236
0.0857143	0.235294	0.964286	0.923077	0.140351	0.25	0.0674157
0.0857143	0.470588	0.25	0.461538	1.26316	0.333333	0.539326
0.114286	0.882353	5.92857	1.61538	1.40351	5.33333	0.0674157
0.0857143	0.176471	1.78571	0.307692	28.3509	0.333333	0.292135
0.0857143	14.2941	0.178571	0.230769	1.08772	0.25	0.808989
0.0857143	28.5294	0.785714	0.307692	0.912281	3	1.4382
0.114286	1.29412	0.535714	108.231	3.40351	2.83333	0.157303
0.0857143	1.35294	3.03571	5.30769	1.61404	1.75	2.33708
0.142857	0.235294	2.82143	0.307692	0.105263	5.91667	0.157303
0.0857143	0.176471	0.464286	2.38462	0.105263	0.25	10.9888
0.0857143	1.47059	0.607143	0.615385	0.140351	0.333333	4
0.0857143	0.411765	1.25	0.923077	0.140351	0.25	0.561798
0.0857143	0.235294	0.142857	1.30769	0.105263	0.25	0.0898876
0.0857143	202.765	2.5	0.461538	0.45614	0.333333	0.292135
0.0857143	1.11765	1.14286	4.23077	0.210526	0.75	0.314607
0.114286	0.352941	0.357143	0.384615	1.01754	0.25	1.4382
0.171429	0.470588	2.96429	0.230769	0.280702	10.5833	2.96629
0.142857	61.7647	0.214286	0.384615	1.75439	7.66667	0.426966
0.114286	0.235294	0.214286	0.230769	0.315789	0.25	1.77528
0.114286	0.294118	1.78571	0.538462	0.280702	0.25	9.46067
0.0857143	11.9412	3.28571	1.15385	0.210526	0.25	0.11236
0.0857143	0.470588	1.75	2.53846	0.245614	0.25	1.01124
0.0857143	1.82353	2.78571	0.615385	0.280702	1.91667	0.0674157
0.0857143	0.176471	0.25	1.53846	5.29825	0.333333	0.876404
0.0857143	0.294118	0.428571	0.230769	1.57895	0.25	0.404494
0.171429	3.58824	3.96429	0.307692	0.105263	3.58333	0.157303
0.171429	2.17647	0.107143	15.3846	0.666667	0.25	1.68539
0.0857143	0.588235	0.142857	1	0.45614	1.91667	2.92135
0.114286	4.35294	0.714286	1.30769	1.12281	0.416667	11.9326
0.114286	0.470588	1	0.307692	0.140351	0.333333	0.539326
0.0857143	0.411765	4.96429	0.692308	5.22807	0.25	5.19101
0.114286	18.4118	0.214286	0.461538	6.17544	0.5	1.61798
0.0857143	3.47059	0.285714	0.384615	0.807018	0.666667	0.629213
0.228571	2.23529	0.214286	0.538462	8.59649	0.333333	1.03371
0.0857143	0.941176	0.142857	9.92308	4.98246	0.666667	0.157303
0.0857143	108.471	2.28571	0.384615	0.385965	0.25	0.359551
0.0857143	0.352941	1.14286	0.307692	1.47368	0.25	1.19101
0.0857143	0.529412	0.25	6.76923	0.280702	0.25	0.292135
0.0857143	0.176471	0.285714	1.61538	0.105263	0.25	1.4382
0.0857143	0.352941	0.214286	0.384615	1.05263	1.91667	0.741573
0.2	2.64706	2.17857	0.307692	1.12281	0.333333	2.17978
0.114286	1.88235	0.428571	0.923077	0.596491	0.25	2.85393
0.0857143	0.294118	2.78571	0.230769	1.22807	0.333333	5.05618
0.142857	0.411765	17.6429	1	0.210526	0.416667	0.561798
0.114286	1.17647	4.67857	3.84615	3.29825	16.1667	0.11236
0.0857143	0.352941	29.8571	0.384615	0.526316	0.416667	0.11236
0.114286	0.411765	8.71429	0.230769	12.0702	11.5	0.741573
0.0857143	0.823529	0.142857	1.23077	3.47368	0.5	0.337079
0.0857143	3.88235	4.5	1.30769	0.210526	0.25	0.382022
0.0857143	0.588235	0.571429	0.307692	1.22807	0.5	0.337079
0.114286	70.4706	1.42857	1.07692	0.105263	1	0.382022
0.0857143	0.705882	1.92857	1.92308	0.210526	0.5	0.269663
0.0857143	168.529	0.107143	0.538462	1.08772	0.25	0.157303
0.0857143	0.705882	1.28571	0.692308	0.245614	0.333333	1.59551
0.114286	3.29412	0.214286	1.15385	0.105263	2	0.831461
0.0857143	0.235294	0.428571	2	0.210526	0.25	4.17978
0.0857143	3.52941	0.714286	1.76923	2.98246	0.25	0.764045
0.0857143	1.88235	0.571429	0.230769	0.350877	0.25	0.134831
0.0857143	3	6.78571	0.230769	2.84211	0.75	1.55056
0.0857143	1.05882	10.8214	0.230769	1.22807	0.333333	9.77528
0.0857143	1.82353	0.142857	0.461538	0.105263	1.91667	1.37079
0.0857143	0.411765	0.25	0.846154	1.19298	0.5	1.19101
0.114286	0.235294	0.5	0.461538	2.45614	0.666667	1.48315
0.114286	0.823529	0.642857	1.15385	0.245614	0.416667	0.157303
0.0857143	1.05882	2.64286	1.30769	0.45614	1	0.629213
0.0857143	2.35294	0.535714	1.23077	0.947368	0.25	0.0674157
0.0857143	0.764706	0.25	0.769231	2.14035	0.25	0.539326
0.0857143	3.29412	0.107143	0.461538	0.421053	1.25	0.606742
0.0857143	1.58824	0.464286	0.615385	21.6491	0.25	2.83146
0.0857143	4.94118	0.821429	1.61538	0.210526	4.16667	0.0674157
0.0857143	0.529412	0.285714	0.692308	0.350877	0.833333	0.0674157
0.0857143	0.411765	1.07143	1.69231	0.140351	0.25	0.404494
0.142857	0.647059	1.03571	0.692308	0.666667	0.333333	0.0674157
0.0857143	0.588235	0.535714	0.538462	0.526316	0.333333	1.10112
0.0857143	1	0.642857	2.30769	0.77193	0.916667	0.157303
0.114286	0.235294	1.82143	12.7692	0.280702	0.25	1.32584
0.0857143	0.235294	0.464286	0.384615	1.01754	0.333333	4.20225
0.142857	69.2941	0.178571	0.384615	0.631579	1.08333	0.764045
0.0857143	0.823529	0.392857	0.384615	1.19298	0.25	0.426966
0.0857143	0.176471	0.821429	0.461538	0.140351	1	0.651685
0.114286	0.294118	3.67857	0.230769	12.2807	1.58333	0.0898876
0.0857143	2.29412	0.75	0.384615	2.77193	0.416667	0.94382
0.0857143	0.470588	0.607143	2	3.4386	2.25	0.449438
0.114286	0.176471	0.964286	0.307692	0.280702	0.25	1.23596
0.114286	0.352941	0.178571	0.307692	3.22807	0.25	0.11236
0.0857143	1.05882	2.85714	0.538462	2.10526	0.5	0.269663
0.0857143	0.823529	0.321429	0.230769	0.491228	0.416667	1.41573
0.0857143	0.352941	3.03571	0.230769	5.40351	0.666667	0.516854
0.0857143	0.176471	2.07143	0.307692	1.78947	1.25	0.134831
0.0857143	0.470588	0.785714	0.230769	2.66667	4.41667	0.337079
0.114286	0.588235	0.214286	2.76923	1.82456	0.416667	0.11236
0.114286	9.88235	0.428571	0.230769	0.175439	21.6667	0.47191
0.228571	0.235294	0.714286	0.692308	0.245614	0.5	0.808989
0.0857143	0.882353	1.67857	0.615385	1.50877	0.5	0.382022
0.0857143	0.176471	1.28571	0.461538	0.701754	0.25	0.494382
0.0857143	0.235294	0.392857	3.84615	0.140351	0.75	0.674157
0.0857143	2.94118	0.178571	0.769231	5.19298	0.75	2.49438
0.0857143	0.235294	0.392857	0.846154	1.15789	0.333333	0.47191
0.0857143	0.176471	0.142857	0.384615	0.701754	0.916667	0.224719
0.0857143	0.352941	0.178571	0.384615	0.105263	2.41667	0.426966
0.2	0.588235	0.392857	2.23077	0.77193	1	1.01124
0.142857	1.70588	1.89286	2	0.982456	0.5	7.73034
0.0857143	1.35294	0.107143	0.923077	0.105263	15	1.8427
0.0857143	0.941176	0.75	0.384615	0.421053	0.5	1.10112
0.0857143	0.176471	3	1.53846	8.91228	0.333333	0.494382
0.0857143	5.17647	0.285714	0.230769	0.350877	0.25	2.94382
0.114286	0.470588	0.785714	0.307692	0.561404	0.416667	1.41573
0.0857143	0.411765	0.642857	3.61538	0.421053	0.25	0.94382
0.0857143	1.52941	0.678571	0.615385	0.210526	0.333333	0.0674157
0.114286	0.411765	0.642857	5.38462	0.666667	1	0.382022
0.0857143	0.176471	0.357143	0.230769	0.175439	0.25	1.4382
0.0857143	0.235294	0.642857	0.615385	0.245614	0.416667	1.07865
0.0857143	0.941176	0.357143	0.538462	0.807018	0.416667	1.19101
0.142857	6.82353	0.857143	0.846154	1.33333	0.25	2.40449
0.0857143	0.411765	0.607143	0.769231	1.05263	0.25	0.337079
0.0857143	0.941176	1	13.4615	0.210526	0.25	0.179775
0.0857143	0.352941	0.214286	10.3077	0.947368	0.833333	0.202247
0.0857143	4.11765	0.392857	0.307692	0.280702	0.416667	0.808989
0.0857143	0.470588	1.92857	0.230769	0.315789	0.5	5.61798
0.0857143	80.9412	0.107143	4.46154	4.52632	2	0.179775
0.0857143	21	0.25	2	0.385965	0.416667	0.337079
0.0857143	0.352941	0.25	4.84615	3.50877	0.25	1.39326
0.0857143	0.176471	0.321429	0.230769	0.45614	0.583333	1.55056
0.0857143	0.294118	0.178571	0.230769	0.140351	0.75	0.11236
0.0857143	1.82353	3.60714	0.769231	2.73684	0.25	0.359551
0.114286	0.352941	1.75	0.384615	0.140351	0.25	2.35955
0.0857143	0.176471	0.25	0.615385	2.45614	0.833333	3.41573
0.0857143	20.1176	0.25	0.384615	0.912281	0.75	0.921348
0.0857143	0.823529	0.321429	8.07692	0.561404	0.5	0.696629
	0.941176	3.64286	0.307692	0.350877	0.416667	0.674157
28.4	0.705882	2.42857	0.615385	0.140351	0.5	1.41573
2.7	1.47059	0.178571	0.384615	0.666667	2.5	0.359551
6.63333	0.235294	0.107143	4.15385	0.421053	0.333333	0.202247
3.5	5.23529	0.321429	0.307692	0.877193	0.25	0.876404
3.33333	1.29412	0.892857	0.230769	0.140351	0.583333	0.157303
0.266667	9.41176	0.285714	0.538462	0.491228	0.25	2.13483
1.36667	0.411765	0.107143	9.07692	0.210526	0.25	1.70787
2.46667	0.941176	0.285714	0.307692	0.105263	0.333333	0.494382
0.4	1.05882	1.28571	0.769231	0.385965	0.25	0.0898876
0.366667	4.29412	7.35714	0.230769	0.631579	87.4167	0.449438
0.466667	236.647	1.5	2.92308	1.26316	0.333333	0.629213
1.16667	0.294118	0.142857	8.38462	0.105263	0.5	1.88764
0.933333	0.529412	0.107143	0.307692	0.45614	0.416667	0.134831
0.2	1.11765	0.5	1.46154	1.01754	1.08333	0.606742
0.466667	0.352941	0.821429	1.38462	1.26316	0.416667	0.629213
2.5	0.470588	1.21429	0.692308	0.736842	0.833333	1.95506
0.3	0.176471	0.392857	0.461538	0.210526	0.5	1.32584
0.633333	2.29412	0.142857	3	1.96491	0.583333	0.696629
0.866667	0.470588	0.464286	0.846154	3.47368	0.25	1.19101
3.63333	0.176471	0.571429	0.307692	1.05263	0.333333	1.48315
0.533333	0.294118	0.142857	0.230769	0.807018	0.5	0.764045
0.8	0.470588	0.142857	2	1.47368	0.25	0.0674157
1.33333	0.352941	0.142857	2.92308	0.245614	1.08333	2.69663
0.433333	0.235294	0.214286	0.846154	0.385965	0.25	0.202247
0.166667	1.17647	0.464286	3.38462	1.05263	0.666667	7.73034
3.1	0.294118	0.428571	0.230769	0.631579	0.5	0.58427
1.6	1.05882	4.57143	0.461538	0.105263	0.333333	2.17978
2.6	5.64706	0.178571	2.07692	1.33333	0.666667	1.4382
0.666667	0.352941	0.107143	0.230769	0.175439	0.416667	0.47191
0.866667	1.41176	184	0.846154	0.105263	13	4.78652
0.366667	2.35294	0.107143	4.15385	1.29825	0.416667	0.606742
3.23333	0.411765	1.14286	0.230769	2.24561	0.25	0.988764
2.3	1.29412	0.107143	0.307692	1.29825	0.25	0.94382
0.333333	0.411765	0.785714	1	0.175439	2.58333	1.03371
0.633333	0.176471	0.714286	0.538462	0.842105	0.666667	0.719101
1.43333	0.470588	0.5	0.384615	0.315789	77.6667	5.4382
0.3	0.470588	0.714286	0.846154	0.666667	1.58333	4.53933
2.4	0.823529	0.107143	0.923077	0.421053	0.25	0.269663
1	0.705882	0.535714	0.461538	0.210526	1.75	0.786517
0.133333	0.294118	1.71429	2	0.491228	0.25	0.11236
2.46667	0.176471	1.25	0.461538	0.350877	0.583333	0.47191
0.4	0.235294	2.75	0.384615	0.245614	0.5	0.58427
0.966667	0.411765	0.892857	0.307692	2.91228	0.5	0.539326
0.333333	3.58824	0.285714	0.384615	1.33333	0.25	0.0674157
0.833333	11.5882	4.5	1.23077	0.315789	0.416667	0.449438
0.133333	16.4706	0.321429	0.692308	0.491228	4.25	0.134831
1.36667	0.470588	1.07143	2.23077	0.175439	0.333333	0.606742
0.133333	1.82353	0.107143	0.846154	0.210526	1.33333	0.0898876
0.166667	1.41176	1.32143	0.461538	0.175439	0.25	0.0898876
6.36667	0.529412	1.35714	1.15385	0.140351	0.5	0.719101
1.13333	0.235294	0.178571	3.69231	0.631579	0.5	0.898876
3.86667	0.705882	0.5	1.23077	2.94737	0.25	0.247191
2.26667	5.29412	0.25	1.92308	0.105263	13.1667	1.25843
0.333333	0.176471	0.142857	0.923077	1.22807	0.583333	1.30337
0.133333	0.176471	0.178571	0.307692	0.140351	0.25	1.23596
0.166667	0.235294	0.535714	18	1.08772	1.83333	0.11236
0.333333	1.05882	0.178571	4	0.140351	0.416667	0.449438
3.36667	0.176471	0.428571	1.46154	0.105263	0.333333	1.19101
0.933333	1.05882	4.32143	0.615385	1.68421	0.5	0.157303
4.73333	0.588235	0.178571	0.538462	0.245614	0.75	4.35955
2.53333	0.411765	0.857143	0.461538	0.701754	0.75	0.449438
0.133333	2.41176	0.571429	1.38462	0.105263	0.583333	0.674157
2.56667	0.176471	0.178571	2.30769	0.526316	60.9167	1.07865
0.633333	0.941176	0.321429	4.76923	0.210526	0.333333	0.0898876
0.1	0.235294	0.214286	16.5385	0.315789	1.33333	0.696629
0.4	3.23529	0.392857	1.46154	0.350877	3	0.11236
1	0.529412	0.107143	0.384615	0.210526	0.25	0.337079
0.366667	3.47059	1.17857	0.461538	0.45614	3.5	0.808989
0.366667	1.88235	0.25	0.461538	0.105263	4.08333	20.7191
8.6	0.176471	0.107143	0.307692	0.807018	0.25	0.269663
0.533333	16.8235	0.107143	0.307692	0.701754	0.333333	0.741573
0.8	0.176471	0.142857	8.76923	0.140351	0.25	1.50562
2.33333	0.294118	0.107143	0.384615	1.36842	0.25	0.0674157
1.96667	0.294118	0.107143	0.923077	0.280702	0.25	5.03371
1.76667	0.529412	0.928571	1.53846	2.17544	1	9.03371
1.16667	4.58824	0.107143	0.538462	1.85965	0.833333	1.4382
1.4	1.88235	0.321429	0.307692	0.175439	0.75	0.247191
0.233333	2.70588	1.10714	0.307692	0.385965	0.25	36.2022
0.633333	1.17647	1	0.846154	1.57895	0.333333	0.247191
0.766667	0.176471	0.321429	0.230769	0.561404	0.75	0.741573
0.2	7.82353	0.142857	0.615385	4.10526	0.5	0.426966
0.533333	0.470588	0.25	1.38462	0.982456	0.333333	0.741573
1.56667	4.76471	1.14286	0.538462	0.245614	1	0.179775
117.567	55.7647	1.71429	0.307692	0.140351	0.666667	0.157303
0.266667	0.294118	0.25	0.384615	0.105263	0.333333	7.19101
0.2	0.235294	0.571429	0.692308	0.45614	0.25	0.449438
1.83333	0.352941	0.75	0.230769	1.75439	0.583333	0.382022
1.23333	0.823529	0.678571	0.692308	4.38596	0.666667	0.359551
0.433333	0.294118	0.75	0.307692	1.15789	0.333333	0.651685
0.5	0.294118	4.25	0.384615	0.842105	0.333333	0.449438
1.26667	1.17647	0.107143	11.1538	0.736842	0.416667	0.606742
0.2	3.29412	0.25	0.384615	0.350877	0.333333	0.224719
0.833333	0.235294	0.107143	0.923077	1.12281	0.416667	0.157303
5.16667	0.588235	0.107143	0.384615	0.105263	0.333333	0.0674157
2.3	0.294118	1	0.692308	0.526316	0.416667	0.47191
2.7	0.470588	0.392857	0.615385	1.64912	0.25	0.58427
2.5	2.17647	0.321429	1.46154	0.736842	0.25	0.404494
3.63333	0.176471	1.75	1.92308	0.666667	0.416667	0.11236
1.2	0.470588	1.32143	0.230769	0.912281	0.333333	8.76404
1.03333	0.176471	0.321429	3.61538	6.2807	0.25	0.179775
2.5	0.352941	0.142857	0.230769	1.08772	0.416667	0.179775
0.433333	4.17647	0.178571	2	0.350877	1.25	1.2809
1.4	2.94118	1.53571	11.6154	0.561404	0.25	1.75281
7.33333	0.294118	0.107143	9.76923	0.350877	0.333333	0.224719
0.433333	0.294118	0.107143	0.230769	0.245614	0.25	8.33708
1.9	0.235294	0.178571	0.307692	0.105263	0.25	0.247191
1.13333	0.235294	1.17857	27.8462	0.315789	0.416667	0.337079
1.8	0.176471	2.96429	0.461538	0.175439	0.416667	0.157303
0.266667	0.705882	1.5	0.538462	12.7018	0.25	4.22472
0.266667	0.176471	0.392857	0.230769	0.631579	0.416667	1.66292
2.86667	0.176471	0.107143	0.538462	0.105263	0.333333	0.853933
3.16667	0.470588	0.392857	3.69231	0.105263	0.25	0.157303
1.5	0.647059	0.107143	0.461538	0.105263	3.66667	1.1236
0.4	172.765	1.17857	0.923077	1.19298	0.416667	5.03371
3.83333	0.411765	0.25	4.46154	0.701754	0.833333	3.95506
1.06667	0.764706	0.964286	4.23077	0.175439	0.416667	0.0898876
0.633333	0.235294	0.142857	0.461538	0.842105	0.25	0.11236
0.333333	0.235294	0.107143	4.69231	0.210526	0.25	0.0674157
0.1	1.05882	0.107143	0.538462	0.666667	0.416667	0.404494
1.93333	0.352941	0.107143	0.846154	5.75439	0.416667	0.134831
0.4	0.529412	0.75	0.230769	1.61404	93.5	0.0674157
0.6	0.176471	0.107143	0.461538	0.877193	0.75	0.202247
0.3	0.176471	0.107143	67.6923	0.912281	0.25	0.11236
1.66667	0.882353	0.25	0.923077	0.140351	0.416667	1.23596
17.0667	5.11765	0.392857	0.461538	0.105263	1.25	0.202247
1.9	0.529412	0.107143	0.538462	1.08772	0.333333	0.11236
12.3	0.235294	0.142857	1.61538	0.210526	0.416667	0.337079
0.6	1.41176	0.535714	1.92308	0.175439	0.25	0.0674157
1.23333	0.235294	0.178571	1.84615	0.175439	0.25	0.0674157
0.333333	5.41176	0.142857	0.230769	0.140351	0.583333	0.157303
2	0.294118	0.107143	0.615385	0.140351	0.25	0.134831
2	1.05882	0.107143	0.461538	0.315789	0.583333	2.58427
1.63333	0.823529	0.214286	1.61538	0.877193	0.5	0.853933
1.23333	2	1.32143	21.5385	0.175439	0.416667	5.64045
2.2	17.4118	0.107143	1.92308	0.140351	0.583333	4.13483
0.433333	0.176471	0.321429	0.230769	0.947368	0.416667	0.134831
0.4	1.23529	0.107143	17.3846	0.245614	0.25	2.51685
4.33333	0.176471	0.107143	0.846154	5.36842	0.416667	0.876404
1.1	0.882353	0.107143	0.692308	0.210526	0.25	0.696629
0.2	0.411765	0.107143	0.538462	3.22807	0.25	0.539326
0.4	4.35294	0.107143	0.384615	0.140351	0.5	0.58427
0.233333	6.17647	0.285714	0.384615	0.210526	0.666667	3.41573
0.1	2.94118	0.25	2.76923	0.210526	0.75	0.0674157
0.366667	0.411765	0.142857	0.230769	1.08772	0.333333	0.561798
5	7.11765	0.107143	0.384615	1.26316	0.5	0.629213
3.46667	2.41176	0.107143	4.38462	0.105263	1.08333	0.0674157
0.366667	0.235294	0.178571	0.384615	1.08772	0.333333	0.0898876
2.2	0.176471	0.107143	0.230769	1.96491	1.16667	0.696629
0.733333	5.52941	0.142857	0.307692	2	0.75	0.269663
1.2	1.70588	0.214286	0.230769	0.45614	0.25	0.134831
0.133333	0.176471	0.178571	0.384615	0.245614	0.25	0.0674157
1	0.647059	0.142857	0.923077	0.245614	0.333333	0.314607
3.4	1.17647	0.178571	0.307692	0.45614	0.25	0.382022
1.6	0.235294	0.142857	1.61538	2.10526	0.333333	0.0674157
1.6	0.235294	0.178571	0.461538	0.526316	0.333333	0.0674157
1.73333	0.176471	0.107143	0.692308	0.421053	0.25	0.134831
0.466667	0.294118	0.107143	0.307692	0.105263	0.25	0.359551
0.166667	0.941176	0.107143	0.615385	1.64912	0.25	0.696629
0.133333	0.294118	0.214286	0.384615	5.15789	0.25	0.0674157
1.56667	0.294118	0.142857	8.30769	0.77193	0.25	0.157303
0.233333	0.411765	0.107143	2.61538	0.280702	0.25	0.651685
0.366667	1.11765	0.142857	0.615385	0.77193	0.333333	2.17978
2.2	42.7647	0.178571	2.53846	1.26316	0.333333	0.898876
0.733333	3.70588	0.178571	0.538462	0.105263	0.25	0.0898876
1.13333	3.47059	0.142857	2.30769	0.350877	106.667	0.0898876
0.266667	0.294118	0.107143	0.384615	2.49123	93.8333	0.651685
4.06667	0.235294	0.178571	1.53846	0.701754	0.333333	0.179775
1.76667	0.823529	0.142857	0.230769	2.52632	0.333333	3.61798
1.5	0.529412	0.107143	0.461538	0.175439	0.833333	0.0674157
0.166667	0.352941	0.285714	0.615385	0.385965	0.333333	1.2809
0.3	1.58824	0.107143	0.692308	0.526316	0.333333	0.696629
6.6	0.588235	0.107143	0.230769	0.105263	0.25	0.921348
2.03333	0.764706	0.107143	1.38462	23.7193	0.833333	0.11236
0.166667	0.176471	0.107143	0.384615	0.105263	0.333333	0.247191
2.93333	0.647059	0.107143	0.615385	0.701754	0.333333	2.98876
1.46667	0.529412	0.107143	0.461538	0.105263	0.333333	2.24719
1.36667	6.88235		1.23077	0.385965	0.25	0.11236
0.466667	0.588235	1.30556	0.846154	0.105263	0.25	6.69663
4.33333	0.470588	5.27778	0.384615	2.5614	0.333333	1.19101
0.633333	4.58824	0.972222	0.384615	0.526316	0.333333	0.561798
2.16667	0.176471	1.33333	0.230769	0.526316	0.25	0.11236
2.13333	0.176471	1.94444	0.769231	4.42105	0.25	0.337079
2.73333	0.941176	0.25	0.307692	0.350877	0.25	1.21348
6.3	0.529412	4.69444	1.76923	0.666667	0.333333	0.58427
0.7	0.294118	0.611111	0.384615	0.315789	0.25	0.539326
0.4	0.294118	3.25	3.07692	2.38596	0.25	0.0674157
1.3	0.294118	0.138889	1.53846	0.45614	0.416667	0.0898876
2.43333	0.764706	6.83333	0.692308	0.631579	0.25	0.0674157
0.8	16.7647	5.08333	1.69231	1.40351	0.5	0.11236
2.13333	0.294118	1.94444	0.615385	3.54386	0.25	5.37079
1.26667	0.176471	0.777778	0.769231	1.33333	0.583333	3.25843
4.2	0.764706	0.138889	0.384615	0.385965	0.75	3.19101
17.8667	7.70588	1.05556	0.384615	0.140351	0.25	0.179775
0.233333	0.235294	0.472222	1.84615	0.210526	1.08333	0.426966
0.566667	4.70588	1.91667	0.461538	0.701754	50.5	2.40449
0.566667	0.764706	15.3889	2.38462	2.21053	0.25	0.224719
1.53333	0.176471	2.52778	0.538462	0.280702	0.833333	1.16854
0.166667	0.470588	2.30556	0.692308	0.210526	0.583333	0.0898876
0.1	0.705882	2.77778	0.230769	0.210526	0.25	0.224719
0.166667	0.411765	3.52778	11.0769	0.140351	0.333333	1.41573
0.5	3	0.666667	0.384615	0.526316	0.5	1.75281
1.03333	1.58824	1.36111	399.769	0.210526	0.416667	0.11236
4.66667	2.11765	0.277778	0.384615	0.666667	0.416667	0.0674157
0.3	0.352941	1.83333	0.230769	0.175439	0.333333	1.73034
1.96667	0.941176	0.0833333	0.230769	0.736842	2.16667	0.47191
0.2	0.176471	1.61111	0.230769	0.385965	0.333333	2.5618
2.43333	0.352941	0.138889	0.307692	3.50877	0.666667	3.14607
6.33333	0.235294	1	0.538462	1.22807	0.25	2.92135
0.3	1.41176	0.75	1.07692	0.210526	33.5	1.46067
0.1	0.647059	0.972222	0.769231	0.807018	0.25	0.0674157
3.7	0.235294	3.19444	0.307692	0.561404	0.333333	0.157303
1.73333	0.764706	2.05556	0.384615	2.73684	0.25	0.0674157
0.233333	0.411765	0.166667	0.384615	0.210526	0.25	0.179775
0.766667	0.176471	6.97222	0.615385	0.140351	0.333333	0.202247
4.33333	0.235294	1.30556	2.30769	11.2982	0.833333	0.404494
0.866667	0.470588	1.47222	2.30769	1.01754	88.4167	6.26966
0.2	11.3529	0.583333	0.307692	0.105263	0.25	0.11236
0.133333	0.647059	1.22222	0.384615	0.105263	0.833333	2.35955
1.7	0.176471	0.722222	0.615385	0.140351	0.25	0.157303
0.233333	0.529412	0.555556	0.461538	0.105263	0.25	0.134831
5.1	0.176471	0.666667	0.461538	0.140351	0.333333	0.202247
0.1	2.23529	3.52778	0.461538	0.421053	0.25	0.426966
3.06667	0.235294	0.611111	0.230769	0.596491	5.5	0.0674157
0.266667	0.176471	0.583333	0.230769	1.26316	0.5	0.764045
1.43333	1.94118	4.88889	0.384615	0.140351	0.416667	0.0674157
0.766667	0.647059	1.05556	393.769	4.94737	0.25	0.0674157
0.5	0.294118	0.944444	0.461538	1.36842	0.333333	0.224719
0.366667	0.235294	1.38889	0.307692	0.596491	0.333333	0.11236
1.36667	0.235294	1.63889	0.384615	0.105263	0.333333	0.0674157
0.433333	0.235294	12.2778	0.230769	1.36842	0.25	0.0898876
0.133333	0.588235	4.91667	0.923077	1.4386	0.5	0.179775
0.2	0.235294	1.75	0.230769	0.280702	0.416667	0.179775
3.43333	0.352941	1.08333	0.230769	0.245614	0.25	0.11236
0.3	3.88235	1.22222	0.307692	0.140351	0.25	0.179775
0.266667	0.470588	0.361111	0.461538	0.45614	0.25	0.11236
6.7	9.70588	1.83333	0.230769	0.175439	0.75	0.0674157
1.56667	5.11765	4.80556	0.230769	0.245614	0.583333	0.157303
3.13333	0.588235	0.75	1.15385	0.210526	0.25	0.988764
2.1	1.17647	0.388889	2.61538	0.105263	0.25	0.337079
1.73333	0.529412	0.111111	0.538462	0.561404	0.25	1.77528
0.266667	3.05882	16.25	0.538462	0.385965	0.333333	0.0674157
0.566667	1.35294	0.0833333	2.76923	0.245614	0.25	1.30337
2.46667	0.294118	0.0833333	0.307692	0.105263	0.25	0.359551
1.23333	0.764706	0.361111	0.538462	1.15789	0.25	0.157303
9	0.352941	2.91667	0.384615	0.561404	0.416667	0.0898876
0.366667	0.705882	0.583333	0.307692	0.140351	0.333333	3.25843
3.6	0.176471	3.08333	0.230769	5.29825	0.333333	0.0674157
1.1	0.176471	0.666667	0.230769	0.631579	0.416667	1.57303
2.56667	0.176471	1.41667	0.230769	0.140351	0.666667	1.37079
1.96667	0.588235	1.75	0.307692	1.19298	0.25	0.179775
1.56667	0.470588	2.41667	0.923077	0.140351	0.25	0.157303
1.13333	2.76471	1.91667	0.538462	1.19298	0.333333	0.0898876
0.1	0.411765	1.86111	6.15385	0.245614	0.25	4.22472
0.233333	0.235294	2	0.461538	0.982456	0.583333	0.516854
1.9	0.176471	1.63889	0.461538	0.140351	0.333333	2.62921
2.4	1.82353	2.38889	0.230769	0.175439	0.25	0.0898876
0.133333	0.294118	4.80556	0.923077	0.175439	0.666667	0.853933
2.46667	0.352941	0.0833333	0.384615	0.210526	0.333333	1.86517
0.766667	1.23529	2.66667	4.61538	0.526316	0.25	1.03371
0.833333	0.235294	3.02778	0.384615	21.8246	0.333333	0.0898876
0.566667	0.235294	1.36111	4.61538	0.140351	0.25	1.57303
0.5	5.47059	2.44444	0.230769	0.315789	0.333333	0.337079
0.833333	17.3529	0.916667	0.538462	0.140351	0.333333	0.58427
0.1	0.882353	0.777778	0.230769	0.105263	0.25	0.0674157
0.366667	0.176471	4.13889	0.923077	1.29825	0.333333	0.202247
3.63333	3.05882	13.4167	2.53846	0.385965	0.333333	1.03371
1.1	0.411765	3.80556	0.230769	0.210526	0.416667	0.134831
0.366667	0.235294	0.75	0.230769	0.140351	0.25	0.134831
2.53333	0.411765	2.36111	0.230769	0.175439	0.25	0.516854
2.06667	0.411765	1.25	2	0.315789	0.666667	0.606742
0.6	0.235294	6.86111	2	1.19298	0.25	7.77528
0.2	0.176471	0.777778	0.846154	0.842105	0.333333	7.05618
0.3	0.352941	2.55556	0.307692	0.210526	0.25	0.292135
0.766667	0.176471	0.694444	3.07692	0.175439	0.333333	0.224719
1.93333	0.705882	0.583333	0.384615	0.210526	0.25	0.202247
1.26667	0.294118	0.138889	0.461538	0.45614	0.25	0.224719
1.73333	0.176471	0.416667	0.384615	0.280702	0.416667	0.179775
3.6	0.176471	6.83333	1.15385	0.350877	0.333333	0.0898876
0.266667	0.235294	2.30556	0.230769	0.140351	0.25	0.0898876
0.3	0.176471	0.222222	1	2.45614	0.25	0.11236
1.43333	0.764706	13.5	0.230769	0.385965	0.416667	0.0674157
0.2	2.64706	1.22222	73.2308	0.245614	0.25	0.674157
2.96667	0.235294	1.33333	3.69231	0.105263	0.25	3.34831
3.63333	0.294118	4.63889	1.76923	0.105263	0.416667	0.0674157
0.1	0.235294	6.05556	0.923077	0.175439	0.916667	0.0674157
1.43333	0.352941	0.138889	1.23077	3.22807	0.333333	0.561798
0.666667	0.176471	0.777778	0.307692	1.85965	0.333333	0.247191
1.73333	4.35294	0.472222	0.692308	0.491228	0.25	0.0674157
0.166667	0.176471	0.722222	0.307692	0.140351	0.333333	3.64045
4.13333	1.17647	3.16667	0.230769	0.105263	0.25	0.0674157
0.633333	0.235294	1.08333	0.615385	0.140351	0.333333	0.741573
0.6	0.588235	1.30556	0.230769	0.105263	0.25	0.876404
1.13333	0.235294	1.55556	0.769231	0.105263	0.25	0.0674157
0.733333	0.235294	0.194444	0.307692	0.280702	0.333333	0.0674157
2.86667	0.529412	0.833333	10.6923	0.561404	0.333333	3.2809
0.366667	1	10.25	0.230769	0.280702	0.333333	0.0674157
0.6	0.823529	9.61111	1.23077	0.982456	0.25	0.0898876
2.2	0.294118	0.138889	0.461538	1.12281	0.333333	3.05618
2.03333	0.176471	0.166667	0.230769	2.14035	0.333333	0.11236
1.7	0.352941	0.388889	1	0.105263	0.5	0.292135
7.6	0.294118	2.16667	0.384615	0.491228	0.25	0.382022
0.233333	0.235294	3.94444	2.53846	0.105263	0.416667	0.516854
0.266667	0.294118	0.25	0.230769	0.105263	0.25	0.134831
0.866667	0.176471	2.47222	0.230769	0.666667	0.25	0.134831
1	0.882353	0.222222	0.230769	0.175439	0.25	0.11236
1.9	0.470588	1.61111	2.76923	0.947368	0.25	0.966292
1.5	0.235294	0.777778	0.769231	0.140351	0.25	0.0898876
1.9	0.235294	0.777778	0.846154	0.315789	0.25	17.0562
0.233333	0.235294	0.416667	0.538462	0.280702	0.25	0.224719
0.4	0.176471	2.30556	0.307692	0.105263	0.25	0.876404
0.366667	2.29412	0.972222	3.30769	0.105263	165.25	0.337079
2.76667	0.176471	0.166667	0.615385	0.210526	0.25	0.0898876
0.533333	0.470588	1.08333	1.07692	0.140351	0.416667	0.561798
0.566667	2.35294	0.0833333	0.307692	0.842105	0.25	0.988764
1.6	1.64706	0.25	0.230769	0.105263	0.25	0.719101
1.56667	0.470588	0.0833333	0.846154	0.105263	0.25	0.134831
0.533333	0.588235	0.472222	1.23077	7.05263	0.25	0.0674157
1.13333	0.352941	10.6111	0.230769	0.491228	0.333333	0.0674157
0.4	3.76471	1.38889	4.46154	0.105263	0.25	0.134831
0.333333	0.235294	2.11111	0.461538	0.350877	0.5	0.0674157
0.533333	0.411765	0.666667	0.230769	0.105263	0.25	0.651685
0.4	3.52941	3.47222	0.230769	0.596491	0.416667	1.23596
2.93333	2.47059	2.61111	2	2.66667	0.416667	0.696629
1.46667	0.352941	0.222222	0.461538	0.210526	0.333333	0.337079
0.166667	0.176471	0.888889	0.384615	4.07018	0.25	0.179775
1.26667	0.647059	24.3056	1.38462	1.26316	0.25	0.0898876
0.1	0.647059	2.61111	0.384615	1.96491	0.333333	0.0674157
0.133333	0.470588	1.36111	0.307692	0.350877	0.25	0.157303
0.833333	0.176471	0.972222	0.230769	0.140351	0.25	0.0674157
0.3	0.294118	0.138889	0.307692	0.807018	0.333333	0.449438
1.3	0.470588	2.16667	0.307692	0.105263	0.25	0.134831
0.466667	0.764706	0.361111	0.384615	0.596491	0.25	0.0674157
2.33333	0.882353	4.83333	0.384615	0.105263	0.333333	2.04494
4.03333	0.941176	0.583333	0.230769	0.280702	0.333333	2.94382
0.3	29.3529	1.08333	0.538462	0.280702	0.25	0.269663
4.2	0.352941	0.0833333	0.230769	2	0.25	2.89888
1.53333	0.176471	9.08333	0.538462	0.105263	0.416667	0.449438
0.2	0.294118	0.25	0.461538	0.140351	0.25	0.764045
1.13333	6.82353	1.63889	0.307692	9.19298	0.25	0.58427
2.8	0.235294	0.805556	0.692308	0.105263	0.25	0.11236
0.533333	0.941176	3.58333	1.15385	0.315789	0.25	0.11236
1.33333	26.7647	0.0833333	4	0.105263	0.25	0.539326
0.8	2.05882	0.111111	0.615385	0.280702	0.25	0.157303
0.7	0.529412	0.0833333	0.538462	6.63158	0.25	2.69663
4.93333	30.1176	2.19444	0.230769	0.140351	0.25	2.5618
1.5	0.235294	0.416667	1.76923	0.807018	0.333333	0.0898876
0.233333	0.294118	0.25	0.538462	0.280702	0.333333	0.314607
0.6	5.17647	0.0833333	0.538462	0.175439	0.416667	1.07865
0.433333	3.05882	0.111111	0.307692	0.175439	0.25	0.134831
0.1	0.352941	0.0833333	0.307692	0.210526	0.25	0.179775
4.76667	0.176471	1.72222	6.46154	0.210526	0.25	0.337079
2.63333	1.23529	0.111111	0.307692	0.105263	0.25	0.0898876
1.6	0.294118	0.111111	0.230769	3.68421	0.25	0.0674157
0.4	1.52941	1.11111	0.384615	0.315789	0.25	2.08989
0.266667	0.352941	1.30556	8.84615	0.245614	0.25	0.0898876
0.666667	1.52941	0.944444	0.692308	0.140351	0.25	0.0674157
0.166667	1.76471	1.02778	0.846154	1.96491	0.25	0.0898876
0.133333	0.705882	6.13889	0.384615	0.631579	0.25	0.0674157
0.3	0.411765	1.08333	0.307692	0.140351	0.25	0.539326
0.566667	0.823529	1	2.69231	0.280702	0.25	0.0674157
0.466667	0.705882	0.777778	2.84615	0.596491	0.25	0.0674157
2.36667	0.411765	0.888889	1.38462	2.38596	0.25	0.11236
0.333333	1	0.555556	0.846154	0.666667	0.25	0.404494
1.6	0.882353	0.111111	0.384615	0.210526	0.416667	0.0898876
3.1	1.35294	1.61111	1.46154	1.05263	0.25	0.0674157
0.566667	0.470588	3.44444	0.538462	1.4386	0.25	0.449438
3.06667	0.411765	0.722222	1.30769	0.631579	0.25	5.23596
1.53333	0.176471	0.416667	0.384615	0.210526	0.25	4.08989
0.733333	0.294118	0.722222	4.23077	1.85965	0.333333	0.157303
1.13333	0.176471	0.416667	0.692308	3.68421	0.25	0.0674157
0.2	0.235294	0.583333	0.461538	0.140351	0.25	2.13483
5.03333	1.52941	2.55556	0.230769	2.45614	0.25	0.0898876
0.466667	0.823529	0.111111	0.230769	0.105263	0.583333	0.0674157
0.933333	0.176471	0.527778	0.923077	0.105263	0.25	0.202247
2.9	0.294118	0.5	0.230769	0.315789	0.333333	0.0674157
0.233333	0.294118	0.166667	0.384615	0.45614	0.25	0.494382
0.466667	0.176471	0.416667	0.230769	0.245614	0.25	0.0674157
0.7	0.176471	0.277778	0.230769	2.66667	0.25	3.32584
8.26667	0.470588	2.86111	1	1.22807	0.25	0.0674157
8.03333	267.706	1.47222	3.15385	8.21053	0.25	0.157303
0.5	1.58824	1.05556	0.230769	3.64912	0.25	1.07865
1.23333	0.176471	3.36111	0.615385	0.280702	0.416667	2.1573
0.733333	0.176471	5.63889	0.384615	0.175439	0.333333	0.134831
0.5	0.411765	11.4167	4.46154	0.140351	0.333333	0.337079
0.133333	0.176471	0.888889	0.461538	0.421053	0.5	0.134831
1.93333	0.470588	1.27778	0.615385	0.140351	0.416667	0.0674157
6.46667	0.235294	0.305556	2.30769	0.350877	0.25	0.0674157
1.3	0.529412	3.41667	0.538462	0.245614	0.25	0.0674157
4.73333	5.17647	1.30556	0.461538	0.140351	0.25	0.11236
0.433333	0.823529	2.38889	0.461538	1.64912	0.25	0.269663
2.46667	0.352941	0.666667	4.53846	0.385965	0.333333	0.0674157
3.5	0.235294	1.63889	0.230769	0.105263	0.25	0.314607
0.933333	4.35294	0.5	0.615385	0.280702	0.25	0.0674157
0.333333	0.235294	0.638889	0.384615	0.631579	0.25	0.134831
0.233333	0.176471	0.111111	0.769231	0.77193	0.25	0.0674157
1.5	0.705882	1.44444	0.538462	0.140351	0.333333	0.134831
0.5	0.588235	1.58333	0.615385	0.105263	0.333333	0.0674157
3.6	0.176471	1.41667	13.2308	0.561404	0.333333	0.0674157
10.2667	4.64706	1.30556	0.461538	0.105263	0.25	0.0674157
0.5	0.411765	0.25	0.461538	0.105263	0.5	0.741573
0.933333	0.411765	2.41667	0.692308	0.105263	0.333333	5.55056
0.133333	0.352941	3.63889	0.230769	0.385965	0.25	0.134831
3.66667	0.176471	0.138889	0.384615	0.421053	0.25	3.32584
0.133333	0.411765	5.02778	0.538462	0.175439	0.25	0.516854
0.5	0.235294	0.0833333	0.692308	0.105263	0.25	0.0898876
1.26667	0.176471	4.63889	0.461538	0.175439	0.25	0.224719
0.733333	0.352941	0.222222	12.3846	0.105263	0.25	0.404494
0.2	1.82353	2.27778	0.384615	0.280702	0.25	0.0674157
0.766667	0.352941	7.72222	16	0.245614	0.25	0.0674157
2.7	0.294118	0.277778	0.307692	0.140351	0.25	0.11236
0.3	0.411765	3.27778	0.307692	1.64912	0.25	0.0674157
1.16667	0.529412	0.138889	1.61538	0.105263	0.25	0.292135
1.86667	0.529412	0.222222	0.384615	0.210526	0.25	0.0674157
0.566667	0.411765	1.47222	0.384615	0.175439	0.25	0.0898876
0.333333	0.235294	2.91667	0.307692	0.315789	0.25	0.0674157
0.533333	0.235294	0.138889	0.307692	0.210526	0.25	0.11236
0.166667	0.411765	0.805556	0.769231	0.280702	0.25	0.224719
0.333333	1.41176	3.94444	1.15385	2.84211	0.25	2.08989
9.83333	0.294118	1.16667	177.154	0.210526	0.25	0.0898876
0.1	0.176471	0.222222	0.230769	0.280702	0.333333	0.179775
0.5	0.294118	0.555556	1	0.175439	0.25	0.0674157
0.433333	0.176471	2.13889	0.461538	0.350877	0.333333	0.157303
0.3	0.352941	0.888889	0.307692	0.105263	0.25	0.11236
0.133333	1.17647	5.22222	5.38462	1.33333	0.333333	0.224719
0.166667	0.176471	0.361111	0.307692	0.140351	0.25	0.11236
0.433333	0.294118	4.61111	0.384615	0.175439	0.25	0.831461
2.7	0.529412	1.11111	0.615385	3.4386	0.25	0.741573
1.96667	0.294118	0.305556	0.384615	0.421053	0.25	0.0674157
10.2333	0.529412	0.5	1.07692	0.210526	0.333333	0.0898876
0.133333	0.176471	0.222222	2.84615	0.105263	0.25	0.0674157
2.33333	0.176471	0.0833333	1.07692	0.45614	0.333333	0.11236
3.6	0.411765	0.583333	0.307692	0.140351	0.333333	0.11236
0.533333	0.352941	0.916667	1.76923	1.4386	0.25	0.157303
0.733333	0.176471	1.66667	1.38462	0.315789	0.25	0.0674157
0.133333	0.176471	0.472222	0.384615	0.280702	0.25	0.0898876
1.06667	0.235294	0.111111	0.615385	0.245614	0.25	0.0898876
0.233333	0.176471	7.27778	1.69231	1.19298	0.25	0.0898876
0.266667	0.764706	0.611111	0.307692	0.105263	0.25	0.0674157
0.6	0.235294	6.91667	1.38462	1.75439	0.25	0.0674157
0.1	0.176471	0.638889	0.692308	0.105263	0.25	0.0674157
10.9	0.294118	2.30556	0.384615	0.45614		0.0674157
0.2	0.294118	3.61111	0.769231	0.210526	4.8	0.11236
0.266667	0.294118	1.08333	0.307692	0.140351	12.25	0.0674157
2.13333	0.352941	0.833333	0.307692	0.105263	0.2	0.0898876
0.466667	0.411765	0.416667	1.46154	0.105263	1.8	0.0674157
0.233333	1.29412	1.5	0.461538	0.105263	4.6	0.0674157
0.166667	0.294118	0.138889	1.30769	0.105263	0.3	0.0674157
0.266667	0.764706	3.41667	0.384615	0.175439	0.3	0.179775
0.333333	0.176471	1.38889	0.769231	0.315789	0.35	0.0674157
2.23333	3.58824	2.58333	39.9231	0.385965	0.7	0.0674157
3.5	0.176471	0.111111	0.307692	0.175439	3.3	0.0898876
4.43333	0.235294	1.02778	1	3.78947	1.5	0.157303
3.36667	0.294118	1.25	0.230769	0.105263	1.9	0.134831
1.13333	0.294118	41.0556	0.384615	0.105263	1.2	1.77528
0.233333	0.235294	0.0833333	0.230769	0.140351	1.8	0.11236
1.13333	1.41176	1.16667	0.846154	0.105263	0.7	0.0674157
0.266667	0.176471	6.19444	0.538462	0.105263	1.5	0.0674157
1	1.76471	0.111111	0.692308	0.105263	0.85	0.0674157
3.7	0.294118	0.111111	0.461538	0.280702	0.35	0.0898876
0.166667	0.235294	0.416667	0.230769	0.105263	0.35	0.0898876
0.566667	5.05882	0.25	2.61538	0.385965	2.9	0.11236
2.6	0.235294	1.13889	0.461538	0.105263	1.2	0.0674157
0.566667	0.882353	0.277778	0.307692	0.245614	0.65	0.0674157
1.9	0.529412	2.66667	14.6923	0.105263	0.65	0.11236
1.3	0.176471	0.25	2.15385	0.105263	0.35	0.0674157
0.1	0.294118	0.416667	0.461538	0.526316	20.6	0.0674157
1.93333	0.647059	0.361111	0.384615	0.105263	60	0.224719
1.4	0.823529	0.583333	1.38462	0.105263	0.55	0.0674157
0.533333	0.882353	3.08333	1.76923	0.350877	1.3	0.11236
0.633333	0.470588	2.80556	0.615385	0.105263	9.25	0.0898876
0.6	0.294118	1.44444	0.307692	0.175439	11.95	0.0674157
0.2	1.17647	5.16667	0.230769	0.175439	0.75	0.0674157
0.3	5.47059	0.361111	0.384615	0.105263	1.2	0.0674157
1.46667	1.11765	2.27778	0.230769	0.561404	1.55	0.0674157
4.6	0.294118	3.77778	0.307692	0.105263	5.55	0.0674157
1.33333	0.470588	3.02778	0.307692	0.245614	0.25	0.0898876
0.3	0.352941	2.27778	0.384615	0.105263	0.3	0.0674157
4.1	0.352941	0.388889	4.53846	0.526316	0.2	0.11236
2.4	0.764706	0.833333	0.461538	0.350877	1.8	0.0898876
212.2	0.352941	1.27778	0.230769	0.140351	3.05	0.134831
0.633333	0.588235	0.361111	1.61538	0.105263	2.55	0.0674157
0.533333	0.176471	0.694444	0.230769	0.140351	0.85	0.0674157
0.933333	0.294118	1.11111	3.46154	1.57895	0.15	0.0898876
0.566667	0.176471	0.777778	0.230769	0.210526	162.55	0.0674157
4.13333	1.82353	0.5	0.923077	0.140351	2.15	0.0898876
2.1	0.411765	0.138889	0.230769	0.140351	0.6	0.0674157
0.433333	0.882353	12.8611	1.61538	0.105263	0.55	0.0674157
1.2	0.588235	7.16667	0.384615	0.385965	1.7	0.0674157
0.166667	0.470588	2.19444	0.538462	0.105263	0.7	0.0674157
0.3	0.352941	1.58333	0.307692	0.105263	20.95	0.0674157
0.866667	0.176471	0.0833333	2.84615	0.175439	2.6	0.0674157
0.7	0.235294	1.11111	0.307692	0.140351	56.2	0.0674157
1.46667	0.588235	0.166667	0.769231	0.175439	7.35	0.0674157
0.133333	0.176471	1	1	0.210526	2.45	0.0674157
1.03333	2.58824	0.0833333	0.769231	0.105263	0.5	0.0674157
0.866667	0.294118	1.69444	0.230769	0.105263	0.2	0.0674157
1	0.235294	0.694444	0.307692	0.105263	0.95	0.0674157
0.366667	0.411765	0.388889	0.538462	0.175439	2.05	0.0674157
0.233333	0.411765	0.111111	0.384615	0.105263	0.5
0.733333	1.52941	2.72222	0.307692	0.105263	1.65	0.727273
0.766667	0.411765	0.555556	0.230769	0.105263	17.7	1.90909
2.86667	0.176471	0.777778	746.308	0.140351	0.8	10.9091
1.03333	0.470588	0.5	1.15385	0.175439	3.9	0.363636
3.13333	0.235294	0.5	2.30769	3.68421	2.7	5.68182
6.5	3.47059	1.58333	0.230769	0.210526	50.95	0.590909
0.133333	2.88235	0.527778	1.07692	0.175439	0.7	4.13636
0.366667	0.294118	0.111111	0.307692	0.175439	0.35	0.954545
0.833333	0.235294	0.416667	0.384615	0.105263	0.25	0.454545
0.333333	0.176471	1.36111	20.7692	0.105263	10.2	8.95455
0.266667	0.176471	0.527778	0.307692	0.105263	30	4.09091
0.933333	0.235294	1.44444	0.615385	0.175439	2.4	1.18182
0.366667	19.0588	2.08333	1	0.105263	0.4	1.40909
0.6	0.176471	0.361111	0.307692	0.140351	1	1.18182
0.3	1	2.86111	0.230769	0.491228	0.85	2.5
0.166667	0.235294	0.194444	0.230769	0.140351	12.3	2.72727
0.766667	0.176471	4.77778	0.384615	0.175439	0.2	1.27273
0.1	7	2.05556	0.615385	0.140351	4.4	5.72727
4.76667	0.470588	0.638889	0.230769	0.245614	1.65	1.77273
0.6	0.294118	0.222222	0.846154	0.526316	0.45	0.954545
0.366667	0.235294	0.805556	0.384615	0.105263	2.8	0.181818
1.26667	1.05882	0.416667	0.307692	0.175439	5.9	0.772727
2.6	0.705882	0.555556	0.461538	0.105263	183.1	0.909091
0.666667	0.529412	0.111111	0.230769	0.105263	6.45	0.136364
1.06667	0.176471	2.52778	0.307692	0.140351	0.65	0.863636
0.4	0.294118	1.69444	0.307692	0.105263	0.5	0.681818
0.1	0.235294	0.166667	0.923077	0.105263	0.8	1.59091
0.566667	0.470588	0.833333	0.230769	0.175439	0.5	1
0.5	0.176471	1.5	0.307692	0.105263	0.4	0.318182
0.2	0.176471	0.472222	0.230769	0.105263	3.3	0.727273
0.166667	0.294118	2	0.923077	0.385965	0.3	0.227273
11.0333	0.411765	1.22222	2.07692	0.140351	3.45	2.81818
0.533333	0.470588	35.3889	0.307692	0.105263	0.15	8.36364
0.233333	0.235294	0.111111	0.384615	0.105263	0.6	1.63636
0.533333	0.235294	1.41667	0.384615	0.105263	7.8	0.954545
0.566667	0.176471	1.83333	0.769231	0.140351	6.15	1.86364
1.46667	1.41176	0.166667	0.769231	0.105263	3.45	1.18182
0.566667	0.411765	0.972222	1.61538	0.105263	1	1.13636
1	0.529412	0.416667	0.307692	0.105263	0.2	0.272727
1.13333	0.588235	0.305556	22.6923	0.105263	2.5	5.95455
8.5	0.176471	7	0.384615	0.140351	24.4	7.27273
4.5	0.235294	0.166667	0.384615	0.105263	0.25	0.772727
0.1	3.88235	2.80556	0.230769	0.105263	3.25	1.72727
2.56667	0.235294	1.47222	0.384615	0.105263	0.25	1.18182
0.4	0.294118	0.555556	1.07692	0.105263	0.75	0.863636
0.366667	0.176471	0.361111	0.615385	0.105263	3.45	0.181818
0.366667	0.176471	0.416667	2.92308	0.105263	12.65	2.36364
0.166667	0.352941	0.555556	0.230769	0.105263	0.45	3.04545
0.166667	0.176471	1.61111	0.769231	0.105263	0.15	0.272727
7	0.941176	1.5	0.384615	0.140351	0.7	1.13636
0.1	0.176471	1.19444	0.461538	0.105263	2.3	0.363636
0.166667	0.411765	0.444444	1.23077	0.105263	0.35	0.272727
0.166667	1	5.80556	0.384615	0.105263	0.25	0.409091
2.2	0.176471	1.66667	2.46154	0.105263	0.85	1
1.06667	0.235294	1.27778	0.615385	0.105263	0.45	10.0455
0.1	0.352941	2.97222	1	0.105263	1.55	1.04545
0.233333	0.176471	0.777778	0.230769	0.105263	0.2	0.954545
1.46667	0.470588	0.611111	0.307692	0.105263	70.9	1
1.5	0.235294	1.33333	0.692308	0.105263	0.4	5.81818
1.7	0.294118	1.55556	0.538462	0.105263	1.3	3.90909
0.633333	0.176471	0.194444	8.92308	0.105263	1.9	0.227273
1.06667	0.176471	0.944444	0.615385	0.105263	0.95	2.81818
1.26667	0.470588	0.277778	1	0.105263	0.65	1.22727
4	0.352941	0.111111	0.230769	0.105263	1.55	4.5
1.66667	1.70588	0.222222	0.384615	0.105263	3.05	0.545455
1.33333	0.176471	2.88889	0.846154	0.105263	3.25	0.136364
0.2	0.176471	1.38889	0.538462	0.105263	0.2	0.5
0.366667	0.176471	3.63889	0.230769	0.140351	0.55	0.363636
1.6	0.235294	1.94444	8.15385	0.105263	1	0.636364
0.9	0.588235	1.22222	43.3077	0.105263	2.6	0.181818
0.6	0.176471	0.888889	5.69231	0.105263	0.45	0.636364
1.33333	0.764706	1.27778	0.307692	0.105263	1.35	0.5
2.23333	0.176471	0.333333	0.461538	0.105263	2.1	0.318182
2.16667	0.352941	0.277778	0.307692	0.105263	3.9	0.636364
0.3	0.588235	0.472222	0.230769	0.105263	1.8	1.04545
0.4	0.411765	0.305556	0.230769	0.140351	5.45	3.95455
0.333333	0.235294	0.361111	0.230769	0.140351	1	1.40909
1.56667	0.352941	0.111111	1.15385	0.105263	2.3	1.77273
1.03333	5.70588	0.222222	0.846154	0.105263	0.3	0.272727
0.4	0.235294	0.0833333	0.230769	0.210526	0.3	0.545455
0.5	0.176471	2.55556	0.461538	0.105263	1.2	5.18182
2.9	0.235294	0.777778	1.07692	0.210526	0.4	0.909091
0.333333	0.882353	0.916667	35.3846	0.140351	2.05	1.04545
2.76667	1	1.66667	13.6154	0.105263	0.2	4.5
4.56667	0.294118	0.527778	1.38462	0.140351	9.1	1.81818
0.2	0.176471	0.277778	0.692308	0.210526	0.6	0.772727
0.5	0.235294	0.805556	0.230769	0.140351	2.9	5.5
1.23333	0.176471	1.52778	2.69231	0.140351	11.8	0.136364
0.366667	0.294118	1.52778	0.307692	0.105263	3.7	2.81818
2.46667	0.235294	0.5	0.923077	0.140351	1.55	2.68182
1.2	0.235294	1.27778	0.692308	0.105263	1.55	1.04545
0.566667	0.235294	0.138889	5.07692	0.105263	1.05	0.181818
0.333333	0.294118	4.13889	2	0.105263	6.4	4.59091
1.6	0.294118	1.52778	1.84615	0.140351	0.65	0.272727
0.833333	0.470588	0.805556	1.23077	0.105263	0.95	1.13636
2.06667	0.823529	0.0833333	0.846154	0.105263	0.45	2.36364
1.43333	0.235294	0.0833333	11.9231	0.105263	1.5	0.363636
0.1	0.235294	2.55556	0.307692	0.105263	0.15	1.86364
0.133333	0.176471	11.3611	1.46154	0.140351	7.15	1
1.66667	0.235294	1.36111	1	0.105263	0.3	0.272727
3.5	1.52941	0.527778	0.307692	0.105263	0.55	1.31818
2.06667	0.176471	0.416667	0.307692	0.105263	31	2.36364
1	0.588235	1.05556	0.307692	0.105263	0.3	1.27273
1.36667	1.41176	0.444444	0.769231	0.105263	0.65	4.63636
0.233333	0.235294	1.02778	0.461538	0.105263	0.3	3.81818
2.9	0.411765	4.05556	0.230769	0.105263	2.5	0.227273
0.866667	0.176471	0.861111	2	0.105263	12.35	0.136364
0.166667	0.411765	1.61111	0.230769	0.140351	0.55	1.68182
0.5	0.176471	1.69444	0.846154	0.105263	0.6	0.590909
1.03333	1.41176	4.02778	0.307692	0.105263	0.55	6.72727
0.266667	0.235294	1	5	0.105263	4.5	5.22727
0.566667	0.352941	0.527778	0.230769	0.105263	0.45	1.72727
0.1	0.294118	0.111111	0.846154	0.105263	0.4	1.77273
0.933333	0.352941	2.52778	1.07692	0.105263	0.8	0.454545
0.1	0.352941	3.33333	0.615385	0.105263	6.85	1.31818
2.26667	0.529412	0.944444	0.230769	0.105263	0.15	1.5
0.766667	54.5882	0.277778	0.384615	0.105263	0.65	0.818182
0.4	0.176471	1.52778	0.769231		0.6	7.81818
0.9	0.294118	0.0833333	1.53846	0.275862	0.15	1.22727
2.03333	1.64706	0.222222	1	0.275862	18.1	1.5
1.2	0.176471	0.361111	0.307692	0.586207	0.25	0.5
0.166667	0.294118	0.111111	0.538462	1	2.65	0.636364
0.2	0.176471	2.97222	0.615385	1.2069	0.25	1.04545
0.2	5.76471	0.333333	0.307692	0.37931	0.3	3.63636
0.866667	0.823529	1.11111	0.538462	1.55172	1.7	1
0.466667	0.176471	0.333333	0.692308	1.48276	0.25	0.181818
2.3	0.647059	1.91667	512.308	2.89655	12.65	0.954545
0.166667	0.294118	1.58333	0.230769	1.44828	0.95	0.5
0.1	0.294118	1.77778	0.769231	11.9655	8.3	2.09091
0.233333	0.764706	2.11111	1.30769	0.862069	2.1	2.36364
0.833333	0.235294	1.02778	0.307692	0.482759	0.95	3.04545
1.13333	0.764706	0.0833333	1	2.24138	0.25	0.136364
2.1	0.235294	0.388889	1.23077	3	1.25	22.3182
2.26667	0.176471	0.555556	0.230769	7.44828	0.15	0.727273
0.266667	0.411765	0.972222	0.307692	1.37931	0.55	1.63636
0.366667	0.352941	1	5.23077	1.82759	0.3	1
0.1	0.294118	8.30556	0.538462	2.96552	26.75	1.63636
0.3	0.529412	0.0833333	24.3846	0.275862	0.5	0.136364
0.5	0.235294	3.83333	0.461538	0.137931	0.5	3.40909
0.2	0.176471	1.13889	2.84615	0.482759	0.2	3.09091
6.83333	0.235294	0.5	0.307692	0.344828	0.3	1.27273
1.5	0.411765	0.805556	0.307692	4.7931	0.55	0.272727
1.03333	0.294118	4.41667	0.307692	0.724138	1.65	0.227273
0.1	1	0.527778	0.769231	3.13793	5.15	1.40909
1.9	0.176471	0.361111	3.38462	0.344828	0.9	5.86364
0.3	0.235294	0.138889	0.538462	1.65517	0.4	2.81818
1.03333	0.470588	0.305556	0.230769	0.310345	7.75	0.227273
0.833333	0.176471	0.472222	0.538462	0.344828	1.2	1.09091
0.1	0.352941	3.13889	1.15385	1.51724	1.65	7.09091
1.4	0.176471	0.416667	0.769231	0.137931	0.25	1.68182
0.933333	1.58824	0.416667	1.07692	1.86207	0.15	0.454545
0.533333	0.823529	0.777778	0.230769	2.51724	2	4.77273
0.333333	0.235294	0.361111	0.230769	1.55172	2	0.954545
3.06667	0.529412	1.88889	0.230769	0.310345	1.3	0.136364
0.566667	0.176471	0.166667	0.692308	3.27586	0.8	13.1818
0.433333	0.235294	0.138889	0.230769	0.137931	3.05	1.63636
0.1	0.529412	0.388889	0.538462	0.172414	0.8	0.590909
0.1	0.176471	0.194444	1.61538	1.65517	0.55	0.363636
0.666667	0.470588	1.05556	0.307692	1	0.15	0.227273
0.166667	0.176471	0.305556	0.615385	0.137931	3.9	0.681818
1.13333	0.176471	1.36111	1.46154	1.62069	1.25	2.54545
0.533333	0.176471	2.77778	0.538462	1.34483	0.85	0.954545
1.7	0.176471	0.75	1.53846	1.13793	1	0.772727
0.2	0.176471	0.0833333	0.384615	1	2.9	0.454545
4.53333	0.235294	1.61111	0.307692	0.896552	2.2	0.409091
0.4	0.176471	0.777778	2.23077	4.31034	4.4	0.454545
0.433333	0.176471	0.916667	3.61538	0.862069	2.25	0.181818
[truncated: 3,325 more rows]
